# Supplementary material for: Assessment of Serum Pepsinogens with and without Co-Testing with Gastrin-17 in Gastric Cancer Risk Assessment—Results from the GISTAR Pilot Study
Source: MDPI journal article supplement (doi:10.3390/diagnostics12071746), 2022-07-19
Supplement: s1 [file s1]

Supplemental Figure S1. Spearman correlation of Pg I, Pg II and Pg I/II ratio between ELISA and latex-agglutination pepsinogen tests.

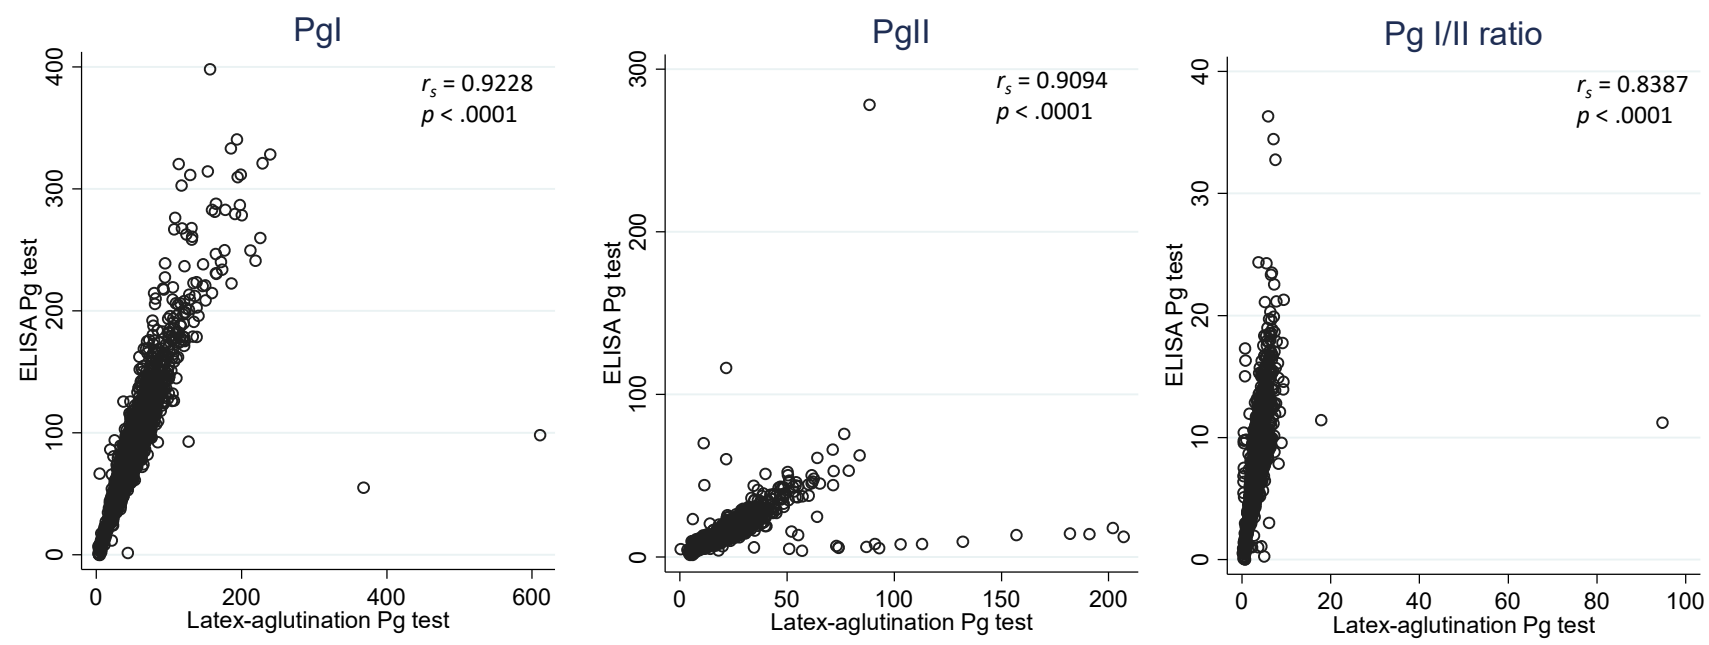

Statistical data has been measured in the 1713 subjects with both pepsinogens data but the graphs do not include seven outlier values of latex-agglutination PgI>1000 and one outlier value of ELISA Pg2>1000.
