# Supplementary material for: Assessment of Serum Pepsinogens with and without Co-Testing with Gastrin-17 in Gastric Cancer Risk Assessment—Results from the GISTAR Pilot Study
Source: Diagnostics (Basel). 2022 Jul 19;12(7):1746. doi: 10.3390/diagnostics12071746 (PMC9325279; doi:10.3390/diagnostics12071746)
Supplement: Supplementary file 1 [file diagnostics-12-01746-s001.zip › Supp Table S1 - Alternative cutoff.xlsx]

## Sheet: Alt COV
						OLGA≥3 (n=44)														OLGIM≥3 (n=40)														OLGA3 or worse (n=93)														CORPUS atrophy, IM (n=53)
	Test	COV	Positivity			TN	FN	FP	TP		Sens	Spec	PPV	NPV	ROC	Liu	Youden	Nearest		TN	FN	FP	TP		Sens	Spec	PPV	NPV	ROC	Liu	Youden	Nearest		TN	FN	FP	TP		Sens	Spec	PPV	NPV	ROC	Liu	Youden	Nearest		TN	FN
	BIOHIT	0	2	0.00191388		1000	1	43	1		2.27273	99.9001	50	95.8773	0.510864	0.0227046	0.0217283	0.977273		1004	1	39	1		2.5	99.9005	50	96.2608	0.512002	0.0249751	0.024005	0.975001		951	1	92	1		1.07527	99.895	50	91.1793	0.504851	0.0107414	0.00970227	0.989248		992	0
	BIOHIT	0.2	5	0.00478469		998	3	42	2		4.54545	99.7003	40	95.9615	0.521229	0.0453183	0.0424575	0.95455		1002	3	38	2		5	99.7015	40	96.3462	0.523507	0.0498507	0.0470149	0.950005		949	3	91	2		2.15054	99.6849	40	91.25	0.509177	0.0214376	0.0183541	0.9785		990	2
	BIOHIT	0.4	7	0.00669856		996	5	42	2		4.54545	99.5005	28.5714	95.9538	0.52023	0.0452275	0.0404595	0.954559		1000	5	38	2		5	99.5025	28.5714	96.3391	0.522512	0.0497512	0.0450249	0.950013		947	5	91	2		2.15054	99.4748	28.5714	91.2331	0.508127	0.0213924	0.0162533	0.978509		988	4
	BIOHIT	0.6	13	0.0124402		992	9	40	4		9.09091	99.1009	30.7692	96.124	0.540959	0.0900917	0.0819181	0.909135		995	10	37	3		7.5	99.005	23.0769	96.4147	0.532525	0.0742537	0.0650498	0.925054		943	9	89	4		4.30108	99.0546	30.7692	91.376	0.516778	0.0426041	0.033557	0.957036		985	7
	BIOHIT	0.8	16	0.015311		990	11	39	5		11.3636	98.9011	31.25	96.2099	0.551324	0.112388	0.102647	0.886432		993	12	36	4		10	98.806	25	96.5015	0.54403	0.098806	0.0880597	0.900079		941	11	88	5		5.37634	98.8445	31.25	91.448	0.521104	0.0531422	0.0422088	0.946307		983	9
	BIOHIT	1	21	0.0200957		985	16	39	5		11.3636	98.4016	23.8095	96.1914	0.548826	0.11182	0.0976523	0.886508		988	17	36	4		10	98.3085	19.0476	96.4844	0.541542	0.0983085	0.0830846	0.900159		936	16	88	5		5.37634	98.3193	23.8095	91.4062	0.518478	0.0528599	0.0369567	0.946386		978	14
	BIOHIT	1.2	29	0.0277512		978	23	38	6		13.6364	97.7023	20.6897	96.2598	0.556693	0.13323	0.113387	0.863942		981	24	35	5		12.5	97.6119	17.2414	96.5551	0.55056	0.122015	0.101119	0.875326		930	22	86	7		7.52688	97.6891	24.1379	91.5354	0.52608	0.0735294	0.0521596	0.92502		971	21
	BIOHIT	1.4	44	0.0421053		966	35	35	9		20.4545	96.5035	20.4545	96.5035	0.58479	0.197394	0.16958	0.796223		969	36	32	8		20	96.4179	18.1818	96.8032	0.58209	0.192836	0.164179	0.800802		919	33	82	11		11.828	96.5336	25	91.8082	0.541808	0.11418	0.0836157	0.882402		963	29
	BIOHIT	1.6	51	0.0488038		960	41	34	10		22.7273	95.9041	19.6078	96.5795	0.593157	0.217964	0.186314	0.773812		963	42	31	9		22.5	95.8209	17.6471	96.8813	0.591604	0.215597	0.183209	0.776126		914	38	80	13		13.9785	96.0084	25.4902	91.9517	0.549934	0.134205	0.099869	0.861141		961	31
	BIOHIT	1.8	55	0.0526316		956	45	34	10		22.7273	95.5045	18.1818	96.5657	0.591159	0.217056	0.182318	0.774034		959	46	31	9		22.5	95.4229	16.3636	96.8687	0.589614	0.214701	0.179229	0.77635		910	42	80	13		13.9785	95.5882	23.6364	91.9192	0.547834	0.133618	0.0956673	0.861346		957	35
	BIOHIT	2	60	0.0574163		951	50	34	10		22.7273	95.005	16.6667	96.5482	0.588661	0.21592	0.177323	0.77434		954	51	31	9		22.5	94.9254	15	96.8528	0.587127	0.213582	0.174254	0.77666		905	47	80	13		13.9785	95.063	21.6667	91.8782	0.545208	0.132884	0.0904152	0.861631		952	40
	BIOHIT	2.2	73	0.0698565		940	61	32	12		27.2727	93.9061	16.4384	96.7078	0.605894	0.256108	0.211788	0.729821		943	62	29	11		27.5	93.8308	15.0685	97.0165	0.606654	0.258035	0.213308	0.72762		894	58	78	15		16.129	93.9076	20.5479	91.9753	0.550183	0.151464	0.100366	0.84092		940	52
	BIOHIT	2.4	79	0.0755981		935	66	31	13		29.5455	93.4066	16.4557	96.7909	0.61476	0.275974	0.22952	0.707624		938	67	28	12		30	93.3333	15.1899	97.1014	0.616667	0.28	0.233333	0.703167		891	61	75	18		19.3548	93.5924	22.7848	92.236	0.564736	0.181147	0.129473	0.808993		935	57
	BIOHIT	2.6	87	0.0832536		928	73	30	14		31.8182	92.7073	16.092	96.8685	0.622627	0.294978	0.245255	0.685707		931	74	27	13		32.5	92.6368	14.9425	97.1816	0.625684	0.30107	0.251368	0.679004		884	68	74	19		20.4301	92.8571	21.8391	92.2756	0.566436	0.189708	0.132873	0.798899		928	64
	BIOHIT	2.8	91	0.0870813		925	76	29	15		34.0909	92.4076	16.4835	96.9602	0.632493	0.315026	0.264985	0.66345		928	77	26	14		35	92.3383	15.3846	97.2746	0.636692	0.323184	0.273383	0.6545		881	71	73	20		21.5054	92.542	21.978	92.348	0.570237	0.199015	0.140474	0.788481		925	67
	BIOHIT	3	101	0.0966507		916	85	28	16		36.3636	91.5085	15.8416	97.0339	0.639361	0.332758	0.278721	0.642004		919	86	25	15		37.5	91.4428	14.8515	97.3517	0.644714	0.34291	0.289428	0.630831		873	79	71	22		23.6559	91.7017	21.7822	92.4788	0.576788	0.216929	0.153576	0.767938		916	76
	BIOHIT	3.2	107	0.102392		911	90	27	17		38.6364	91.009	15.8879	97.1215	0.648227	0.351626	0.296454	0.620188		914	91	24	16		40	90.9453	14.9533	97.4414	0.654726	0.363781	0.309453	0.606794		869	83	69	24		25.8065	91.2815	22.4299	92.6439	0.58544	0.235565	0.17088	0.74704		911	81
	BIOHIT	3.4	114	0.109091		906	95	25	19		43.1818	90.5095	16.6667	97.3147	0.668457	0.390836	0.336913	0.576053		909	96	22	18		45	90.4478	15.7895	97.6369	0.677239	0.407015	0.354478	0.558233		865	87	66	27		29.0323	90.8613	23.6842	92.9108	0.599468	0.263791	0.198936	0.715537		906	86
	BIOHIT	3.6	120	0.114833		900	101	25	19		43.1818	89.9101	15.8333	97.2973	0.66546	0.388248	0.330919	0.577071		903	102	22	18		45	89.8507	15	97.6216	0.674254	0.404328	0.348507	0.559286		859	93	66	27		29.0323	90.2311	22.5	92.8649	0.596317	0.261961	0.192634	0.716369		900	92
	BIOHIT	3.8	133	0.127273		888	113	24	20		45.4545	88.7113	15.0376	97.3684	0.670829	0.403233	0.341658	0.557014		891	114	21	19		47.5	88.6567	14.2857	97.6974	0.680784	0.421119	0.361567	0.537115		849	103	63	30		32.2581	89.1807	22.5564	93.0921	0.607194	0.28768	0.214387	0.686005		889	103
	BIOHIT	4	149	0.142584		874	127	22	22		50	87.3127	14.7651	97.5446	0.686563	0.436563	0.373127	0.515846		876	129	20	20		50	87.1642	13.4228	97.7679	0.685821	0.435821	0.371642	0.516213		836	116	60	33		35.4839	87.8151	22.1477	93.3036	0.616495	0.311602	0.23299	0.656567		875	117
	BIOHIT	4.2	159	0.152153		865	136	21	23		52.2727	86.4136	14.4654	97.6298	0.693432	0.451707	0.386863	0.496234		867	138	19	21		52.5	86.2687	13.2075	97.8555	0.693843	0.45291	0.387687	0.494449		828	124	58	35		37.6344	86.9748	22.0126	93.4537	0.623046	0.327324	0.246092	0.637112		865	127
	BIOHIT	4.4	173	0.16555		852	149	20	24		54.5455	85.1149	13.8728	97.7064	0.698302	0.464263	0.396603	0.478297		854	151	18	22		55	84.9751	12.7168	97.9358	0.699876	0.467363	0.399751	0.47442		818	134	54	39		41.9355	85.9244	22.5434	93.8073	0.639299	0.360328	0.278599	0.597462		852	140
	BIOHIT	4.6	198	0.189474		829	172	18	26		59.0909	82.8172	13.1313	97.8749	0.70954	0.489374	0.419081	0.443712		830	175	17	23		57.5	82.5871	11.6162	97.9929	0.700435	0.474876	0.400871	0.459289		795	157	52	41		44.086	83.5084	20.7071	93.8607	0.637972	0.368155	0.275944	0.582953		830	162
	BIOHIT	4.8	204	0.195215		823	178	18	26		59.0909	82.2178	12.7451	97.8597	0.706543	0.485832	0.413087	0.446067		824	181	17	23		57.5	81.99	11.2745	97.9786	0.69745	0.471443	0.3949	0.461585		789	163	52	41		44.086	82.8782	20.098	93.8169	0.634821	0.365377	0.269642	0.584768		824	168
	BIOHIT	5	221	0.211483		809	192	15	29		65.9091	80.8192	13.1222	98.1796	0.733641	0.532672	0.467283	0.391164		809	196	15	25		62.5	80.4975	11.3122	98.1796	0.714988	0.503109	0.429975	0.422682		778	174	46	47		50.5376	81.7227	21.267	94.4175	0.661302	0.413007	0.322603	0.527313		809	183
	BIOHIT	5.2	242	0.231579		788	213	15	29		65.9091	78.7213	11.9835	98.132	0.723152	0.518845	0.446304	0.401867		788	217	15	25		62.5	78.408	10.3306	98.132	0.70454	0.49005	0.40908	0.43272		758	194	45	48		51.6129	79.6218	19.8347	94.396	0.656174	0.410951	0.312348	0.525031		788	204
	BIOHIT	5.4	262	0.250718		769	232	14	30		68.1818	76.8232	11.4504	98.212	0.725025	0.523794	0.45005	0.393645		769	236	14	26		65	76.5174	9.92366	98.212	0.707587	0.497363	0.415174	0.421477		739	213	44	49		52.6882	77.6261	18.7023	94.3806	0.651571	0.408997	0.303142	0.523355		770	222
	BIOHIT	5.6	282	0.269856		750	251	13	31		70.4545	74.9251	10.9929	98.2962	0.726898	0.527881	0.453796	0.387516		750	255	13	27		67.5	74.6269	9.57447	98.2962	0.710634	0.503731	0.421269	0.412316		721	231	42	51		54.8387	75.7353	18.0851	94.4954	0.65287	0.415323	0.30574	0.512671		750	242
	BIOHIT	5.8	305	0.291866		727	274	13	31		70.4545	72.6274	10.1639	98.2432	0.71541	0.511693	0.430819	0.402765		727	278	13	27		67.5	72.3383	8.85246	98.2432	0.699192	0.488284	0.398383	0.426781		701	251	39	54		58.0645	73.6345	17.7049	94.7297	0.658495	0.427555	0.31699	0.495351		727	265
	BIOHIT	6	328	0.313876		704	297	13	31		70.4545	70.3297	9.45122	98.1869	0.703921	0.495504	0.407842	0.41872		704	301	13	27		67.5	70.0498	8.23171	98.1869	0.687749	0.472836	0.375498	0.441958		680	272	37	56		60.2151	71.4286	17.0732	94.8396	0.658218	0.430108	0.316436	0.489813		705	287
	BIOHIT	6.2	366	0.350239		666	335	13	31		70.4545	66.5335	8.46995	98.0854	0.68494	0.468759	0.36988	0.446424		666	339	13	27		67.5	66.2687	7.37705	98.0854	0.668843	0.447313	0.337687	0.468407		643	309	36	57		61.2903	67.542	15.5738	94.6981	0.644162	0.413967	0.288323	0.505169		668	324
	BIOHIT	6.4	397	0.379904		637	364	11	33		75	63.6364	8.31234	98.3025	0.693182	0.477273	0.386364	0.441284		637	368	11	29		72.5	63.3831	7.30479	98.3025	0.679415	0.459527	0.358831	0.457935		617	335	31	62		66.6667	64.8109	15.6171	95.216	0.657388	0.432073	0.314776	0.484704		639	353
	BIOHIT	6.6	424	0.405742		611	390	10	34		77.2727	61.039	8.01887	98.3897	0.691558	0.471665	0.383117	0.451053		611	394	10	30		75	60.796	7.07547	98.3897	0.67898	0.45597	0.35796	0.464968		592	360	29	64		68.8172	62.1849	15.0943	95.3301	0.65501	0.427939	0.310021	0.490138		612	380
	BIOHIT	6.8	442	0.422967		593	408	10	34		77.2727	59.2408	7.69231	98.3416	0.682567	0.45777	0.365135	0.466674		593	412	10	30		75	59.005	6.78733	98.3416	0.670025	0.442537	0.34005	0.480166		576	376	27	66		70.9677	60.5042	14.9321	95.5224	0.65736	0.429385	0.314719	0.490183		594	398
	BIOHIT	R=0 / Pg1=0	2	0.00191388		1000	1	43	1		2.27273	99.9001	50	95.8773	0.510864	0.0227046	0.0217283	0.977273		1004	1	39	1		2.5	99.9005	50	96.2608	0.512002	0.0249751	0.024005	0.975001		951	1	92	1		1.07527	99.895	50	91.1793	0.504851	0.0107414	0.00970227	0.989248		992	0
	BIOHIT	R=0 / Pg1=5	2	0.00191388		1000	1	43	1		2.27273	99.9001	50	95.8773	0.510864	0.0227046	0.0217283	0.977273		1004	1	39	1		2.5	99.9005	50	96.2608	0.512002	0.0249751	0.024005	0.975001		951	1	92	1		1.07527	99.895	50	91.1793	0.504851	0.0107414	0.00970227	0.989248		992	0
	BIOHIT	R=0 / Pg1=10	2	0.00191388		1000	1	43	1		2.27273	99.9001	50	95.8773	0.510864	0.0227046	0.0217283	0.977273		1004	1	39	1		2.5	99.9005	50	96.2608	0.512002	0.0249751	0.024005	0.975001		951	1	92	1		1.07527	99.895	50	91.1793	0.504851	0.0107414	0.00970227	0.989248		992	0
	BIOHIT	R=0 / Pg1=15	2	0.00191388		1000	1	43	1		2.27273	99.9001	50	95.8773	0.510864	0.0227046	0.0217283	0.977273		1004	1	39	1		2.5	99.9005	50	96.2608	0.512002	0.0249751	0.024005	0.975001		951	1	92	1		1.07527	99.895	50	91.1793	0.504851	0.0107414	0.00970227	0.989248		992	0
	BIOHIT	R=0 / Pg1=20	2	0.00191388		1000	1	43	1		2.27273	99.9001	50	95.8773	0.510864	0.0227046	0.0217283	0.977273		1004	1	39	1		2.5	99.9005	50	96.2608	0.512002	0.0249751	0.024005	0.975001		951	1	92	1		1.07527	99.895	50	91.1793	0.504851	0.0107414	0.00970227	0.989248		992	0
	BIOHIT	R=0 / Pg1=25	2	0.00191388		1000	1	43	1		2.27273	99.9001	50	95.8773	0.510864	0.0227046	0.0217283	0.977273		1004	1	39	1		2.5	99.9005	50	96.2608	0.512002	0.0249751	0.024005	0.975001		951	1	92	1		1.07527	99.895	50	91.1793	0.504851	0.0107414	0.00970227	0.989248		992	0
	BIOHIT	R=0 / Pg1=30	2	0.00191388		1000	1	43	1		2.27273	99.9001	50	95.8773	0.510864	0.0227046	0.0217283	0.977273		1004	1	39	1		2.5	99.9005	50	96.2608	0.512002	0.0249751	0.024005	0.975001		951	1	92	1		1.07527	99.895	50	91.1793	0.504851	0.0107414	0.00970227	0.989248		992	0
	BIOHIT	R=0 / Pg1=35	2	0.00191388		1000	1	43	1		2.27273	99.9001	50	95.8773	0.510864	0.0227046	0.0217283	0.977273		1004	1	39	1		2.5	99.9005	50	96.2608	0.512002	0.0249751	0.024005	0.975001		951	1	92	1		1.07527	99.895	50	91.1793	0.504851	0.0107414	0.00970227	0.989248		992	0
	BIOHIT	R=0 / Pg1=40	2	0.00191388		1000	1	43	1		2.27273	99.9001	50	95.8773	0.510864	0.0227046	0.0217283	0.977273		1004	1	39	1		2.5	99.9005	50	96.2608	0.512002	0.0249751	0.024005	0.975001		951	1	92	1		1.07527	99.895	50	91.1793	0.504851	0.0107414	0.00970227	0.989248		992	0
	BIOHIT	R=0 / Pg1=45	2	0.00191388		1000	1	43	1		2.27273	99.9001	50	95.8773	0.510864	0.0227046	0.0217283	0.977273		1004	1	39	1		2.5	99.9005	50	96.2608	0.512002	0.0249751	0.024005	0.975001		951	1	92	1		1.07527	99.895	50	91.1793	0.504851	0.0107414	0.00970227	0.989248		992	0
	BIOHIT	R=0 / Pg1=50	2	0.00191388		1000	1	43	1		2.27273	99.9001	50	95.8773	0.510864	0.0227046	0.0217283	0.977273		1004	1	39	1		2.5	99.9005	50	96.2608	0.512002	0.0249751	0.024005	0.975001		951	1	92	1		1.07527	99.895	50	91.1793	0.504851	0.0107414	0.00970227	0.989248		992	0
	BIOHIT	R=0 / Pg1=55	2	0.00191388		1000	1	43	1		2.27273	99.9001	50	95.8773	0.510864	0.0227046	0.0217283	0.977273		1004	1	39	1		2.5	99.9005	50	96.2608	0.512002	0.0249751	0.024005	0.975001		951	1	92	1		1.07527	99.895	50	91.1793	0.504851	0.0107414	0.00970227	0.989248		992	0
	BIOHIT	R=0 / Pg1=60	2	0.00191388		1000	1	43	1		2.27273	99.9001	50	95.8773	0.510864	0.0227046	0.0217283	0.977273		1004	1	39	1		2.5	99.9005	50	96.2608	0.512002	0.0249751	0.024005	0.975001		951	1	92	1		1.07527	99.895	50	91.1793	0.504851	0.0107414	0.00970227	0.989248		992	0
	BIOHIT	R=0 / Pg1=65	2	0.00191388		1000	1	43	1		2.27273	99.9001	50	95.8773	0.510864	0.0227046	0.0217283	0.977273		1004	1	39	1		2.5	99.9005	50	96.2608	0.512002	0.0249751	0.024005	0.975001		951	1	92	1		1.07527	99.895	50	91.1793	0.504851	0.0107414	0.00970227	0.989248		992	0
	BIOHIT	R=0 / Pg1=70	2	0.00191388		1000	1	43	1		2.27273	99.9001	50	95.8773	0.510864	0.0227046	0.0217283	0.977273		1004	1	39	1		2.5	99.9005	50	96.2608	0.512002	0.0249751	0.024005	0.975001		951	1	92	1		1.07527	99.895	50	91.1793	0.504851	0.0107414	0.00970227	0.989248		992	0
	BIOHIT	R=0 / Pg1=75	2	0.00191388		1000	1	43	1		2.27273	99.9001	50	95.8773	0.510864	0.0227046	0.0217283	0.977273		1004	1	39	1		2.5	99.9005	50	96.2608	0.512002	0.0249751	0.024005	0.975001		951	1	92	1		1.07527	99.895	50	91.1793	0.504851	0.0107414	0.00970227	0.989248		992	0
	BIOHIT	R=0 / Pg1=80	2	0.00191388		1000	1	43	1		2.27273	99.9001	50	95.8773	0.510864	0.0227046	0.0217283	0.977273		1004	1	39	1		2.5	99.9005	50	96.2608	0.512002	0.0249751	0.024005	0.975001		951	1	92	1		1.07527	99.895	50	91.1793	0.504851	0.0107414	0.00970227	0.989248		992	0
	BIOHIT	R=0 / Pg1=85	2	0.00191388		1000	1	43	1		2.27273	99.9001	50	95.8773	0.510864	0.0227046	0.0217283	0.977273		1004	1	39	1		2.5	99.9005	50	96.2608	0.512002	0.0249751	0.024005	0.975001		951	1	92	1		1.07527	99.895	50	91.1793	0.504851	0.0107414	0.00970227	0.989248		992	0
	BIOHIT	R=0 / Pg1=90	2	0.00191388		1000	1	43	1		2.27273	99.9001	50	95.8773	0.510864	0.0227046	0.0217283	0.977273		1004	1	39	1		2.5	99.9005	50	96.2608	0.512002	0.0249751	0.024005	0.975001		951	1	92	1		1.07527	99.895	50	91.1793	0.504851	0.0107414	0.00970227	0.989248		992	0
	BIOHIT	R=0 / Pg1=95	2	0.00191388		1000	1	43	1		2.27273	99.9001	50	95.8773	0.510864	0.0227046	0.0217283	0.977273		1004	1	39	1		2.5	99.9005	50	96.2608	0.512002	0.0249751	0.024005	0.975001		951	1	92	1		1.07527	99.895	50	91.1793	0.504851	0.0107414	0.00970227	0.989248		992	0
	BIOHIT	R=0 / Pg1=100	2	0.00191388		1000	1	43	1		2.27273	99.9001	50	95.8773	0.510864	0.0227046	0.0217283	0.977273		1004	1	39	1		2.5	99.9005	50	96.2608	0.512002	0.0249751	0.024005	0.975001		951	1	92	1		1.07527	99.895	50	91.1793	0.504851	0.0107414	0.00970227	0.989248		992	0
	BIOHIT	R=0 / Pg1=105	2	0.00191388		1000	1	43	1		2.27273	99.9001	50	95.8773	0.510864	0.0227046	0.0217283	0.977273		1004	1	39	1		2.5	99.9005	50	96.2608	0.512002	0.0249751	0.024005	0.975001		951	1	92	1		1.07527	99.895	50	91.1793	0.504851	0.0107414	0.00970227	0.989248		992	0
	BIOHIT	R=0 / Pg1=110	2	0.00191388		1000	1	43	1		2.27273	99.9001	50	95.8773	0.510864	0.0227046	0.0217283	0.977273		1004	1	39	1		2.5	99.9005	50	96.2608	0.512002	0.0249751	0.024005	0.975001		951	1	92	1		1.07527	99.895	50	91.1793	0.504851	0.0107414	0.00970227	0.989248		992	0
	BIOHIT	R=0 / Pg1=115	2	0.00191388		1000	1	43	1		2.27273	99.9001	50	95.8773	0.510864	0.0227046	0.0217283	0.977273		1004	1	39	1		2.5	99.9005	50	96.2608	0.512002	0.0249751	0.024005	0.975001		951	1	92	1		1.07527	99.895	50	91.1793	0.504851	0.0107414	0.00970227	0.989248		992	0
	BIOHIT	R=0 / Pg1=120	2	0.00191388		1000	1	43	1		2.27273	99.9001	50	95.8773	0.510864	0.0227046	0.0217283	0.977273		1004	1	39	1		2.5	99.9005	50	96.2608	0.512002	0.0249751	0.024005	0.975001		951	1	92	1		1.07527	99.895	50	91.1793	0.504851	0.0107414	0.00970227	0.989248		992	0
	BIOHIT	R=0 / Pg1=125	2	0.00191388		1000	1	43	1		2.27273	99.9001	50	95.8773	0.510864	0.0227046	0.0217283	0.977273		1004	1	39	1		2.5	99.9005	50	96.2608	0.512002	0.0249751	0.024005	0.975001		951	1	92	1		1.07527	99.895	50	91.1793	0.504851	0.0107414	0.00970227	0.989248		992	0
	BIOHIT	R=0 / Pg1=130	2	0.00191388		1000	1	43	1		2.27273	99.9001	50	95.8773	0.510864	0.0227046	0.0217283	0.977273		1004	1	39	1		2.5	99.9005	50	96.2608	0.512002	0.0249751	0.024005	0.975001		951	1	92	1		1.07527	99.895	50	91.1793	0.504851	0.0107414	0.00970227	0.989248		992	0
	BIOHIT	R=0 / Pg1=135	2	0.00191388		1000	1	43	1		2.27273	99.9001	50	95.8773	0.510864	0.0227046	0.0217283	0.977273		1004	1	39	1		2.5	99.9005	50	96.2608	0.512002	0.0249751	0.024005	0.975001		951	1	92	1		1.07527	99.895	50	91.1793	0.504851	0.0107414	0.00970227	0.989248		992	0
	BIOHIT	R=0 / Pg1=140	2	0.00191388		1000	1	43	1		2.27273	99.9001	50	95.8773	0.510864	0.0227046	0.0217283	0.977273		1004	1	39	1		2.5	99.9005	50	96.2608	0.512002	0.0249751	0.024005	0.975001		951	1	92	1		1.07527	99.895	50	91.1793	0.504851	0.0107414	0.00970227	0.989248		992	0
	BIOHIT	R=0 / Pg1=145	2	0.00191388		1000	1	43	1		2.27273	99.9001	50	95.8773	0.510864	0.0227046	0.0217283	0.977273		1004	1	39	1		2.5	99.9005	50	96.2608	0.512002	0.0249751	0.024005	0.975001		951	1	92	1		1.07527	99.895	50	91.1793	0.504851	0.0107414	0.00970227	0.989248		992	0
	BIOHIT	R=0 / Pg1=150	2	0.00191388		1000	1	43	1		2.27273	99.9001	50	95.8773	0.510864	0.0227046	0.0217283	0.977273		1004	1	39	1		2.5	99.9005	50	96.2608	0.512002	0.0249751	0.024005	0.975001		951	1	92	1		1.07527	99.895	50	91.1793	0.504851	0.0107414	0.00970227	0.989248		992	0
	BIOHIT	R=.5 / Pg1=0	2	0.00191388		1000	1	43	1		2.27273	99.9001	50	95.8773	0.510864	0.0227046	0.0217283	0.977273		1004	1	39	1		2.5	99.9005	50	96.2608	0.512002	0.0249751	0.024005	0.975001		951	1	92	1		1.07527	99.895	50	91.1793	0.504851	0.0107414	0.00970227	0.989248		992	0
	BIOHIT	R=.5 / Pg1=5	8	0.0076555		995	6	42	2		4.54545	99.4006	25	95.9499	0.51973	0.0451821	0.0394605	0.954564		999	6	38	2		5	99.403	25	96.3356	0.522015	0.0497015	0.0440299	0.950019		946	6	91	2		2.15054	99.3697	25	91.2247	0.507601	0.0213698	0.0152029	0.978515		988	4
	BIOHIT	R=.5 / Pg1=10	8	0.0076555		995	6	42	2		4.54545	99.4006	25	95.9499	0.51973	0.0451821	0.0394605	0.954564		999	6	38	2		5	99.403	25	96.3356	0.522015	0.0497015	0.0440299	0.950019		946	6	91	2		2.15054	99.3697	25	91.2247	0.507601	0.0213698	0.0152029	0.978515		988	4
	BIOHIT	R=.5 / Pg1=15	8	0.0076555		995	6	42	2		4.54545	99.4006	25	95.9499	0.51973	0.0451821	0.0394605	0.954564		999	6	38	2		5	99.403	25	96.3356	0.522015	0.0497015	0.0440299	0.950019		946	6	91	2		2.15054	99.3697	25	91.2247	0.507601	0.0213698	0.0152029	0.978515		988	4
	BIOHIT	R=.5 / Pg1=20	8	0.0076555		995	6	42	2		4.54545	99.4006	25	95.9499	0.51973	0.0451821	0.0394605	0.954564		999	6	38	2		5	99.403	25	96.3356	0.522015	0.0497015	0.0440299	0.950019		946	6	91	2		2.15054	99.3697	25	91.2247	0.507601	0.0213698	0.0152029	0.978515		988	4
	BIOHIT	R=.5 / Pg1=25	8	0.0076555		995	6	42	2		4.54545	99.4006	25	95.9499	0.51973	0.0451821	0.0394605	0.954564		999	6	38	2		5	99.403	25	96.3356	0.522015	0.0497015	0.0440299	0.950019		946	6	91	2		2.15054	99.3697	25	91.2247	0.507601	0.0213698	0.0152029	0.978515		988	4
	BIOHIT	R=.5 / Pg1=30	8	0.0076555		995	6	42	2		4.54545	99.4006	25	95.9499	0.51973	0.0451821	0.0394605	0.954564		999	6	38	2		5	99.403	25	96.3356	0.522015	0.0497015	0.0440299	0.950019		946	6	91	2		2.15054	99.3697	25	91.2247	0.507601	0.0213698	0.0152029	0.978515		988	4
	BIOHIT	R=.5 / Pg1=35	8	0.0076555		995	6	42	2		4.54545	99.4006	25	95.9499	0.51973	0.0451821	0.0394605	0.954564		999	6	38	2		5	99.403	25	96.3356	0.522015	0.0497015	0.0440299	0.950019		946	6	91	2		2.15054	99.3697	25	91.2247	0.507601	0.0213698	0.0152029	0.978515		988	4
	BIOHIT	R=.5 / Pg1=40	8	0.0076555		995	6	42	2		4.54545	99.4006	25	95.9499	0.51973	0.0451821	0.0394605	0.954564		999	6	38	2		5	99.403	25	96.3356	0.522015	0.0497015	0.0440299	0.950019		946	6	91	2		2.15054	99.3697	25	91.2247	0.507601	0.0213698	0.0152029	0.978515		988	4
	BIOHIT	R=.5 / Pg1=45	8	0.0076555		995	6	42	2		4.54545	99.4006	25	95.9499	0.51973	0.0451821	0.0394605	0.954564		999	6	38	2		5	99.403	25	96.3356	0.522015	0.0497015	0.0440299	0.950019		946	6	91	2		2.15054	99.3697	25	91.2247	0.507601	0.0213698	0.0152029	0.978515		988	4
	BIOHIT	R=.5 / Pg1=50	8	0.0076555		995	6	42	2		4.54545	99.4006	25	95.9499	0.51973	0.0451821	0.0394605	0.954564		999	6	38	2		5	99.403	25	96.3356	0.522015	0.0497015	0.0440299	0.950019		946	6	91	2		2.15054	99.3697	25	91.2247	0.507601	0.0213698	0.0152029	0.978515		988	4
	BIOHIT	R=.5 / Pg1=55	9	0.00861244		994	7	42	2		4.54545	99.3007	22.2222	95.9459	0.519231	0.0451367	0.0384615	0.954571		998	7	38	2		5	99.3035	22.2222	96.332	0.521517	0.0496517	0.0430348	0.950026		945	7	91	2		2.15054	99.2647	22.2222	91.2162	0.507076	0.0213472	0.0141524	0.978522		987	5
	BIOHIT	R=.5 / Pg1=60	9	0.00861244		994	7	42	2		4.54545	99.3007	22.2222	95.9459	0.519231	0.0451367	0.0384615	0.954571		998	7	38	2		5	99.3035	22.2222	96.332	0.521517	0.0496517	0.0430348	0.950026		945	7	91	2		2.15054	99.2647	22.2222	91.2162	0.507076	0.0213472	0.0141524	0.978522		987	5
	BIOHIT	R=.5 / Pg1=65	9	0.00861244		994	7	42	2		4.54545	99.3007	22.2222	95.9459	0.519231	0.0451367	0.0384615	0.954571		998	7	38	2		5	99.3035	22.2222	96.332	0.521517	0.0496517	0.0430348	0.950026		945	7	91	2		2.15054	99.2647	22.2222	91.2162	0.507076	0.0213472	0.0141524	0.978522		987	5
	BIOHIT	R=.5 / Pg1=70	9	0.00861244		994	7	42	2		4.54545	99.3007	22.2222	95.9459	0.519231	0.0451367	0.0384615	0.954571		998	7	38	2		5	99.3035	22.2222	96.332	0.521517	0.0496517	0.0430348	0.950026		945	7	91	2		2.15054	99.2647	22.2222	91.2162	0.507076	0.0213472	0.0141524	0.978522		987	5
	BIOHIT	R=.5 / Pg1=75	9	0.00861244		994	7	42	2		4.54545	99.3007	22.2222	95.9459	0.519231	0.0451367	0.0384615	0.954571		998	7	38	2		5	99.3035	22.2222	96.332	0.521517	0.0496517	0.0430348	0.950026		945	7	91	2		2.15054	99.2647	22.2222	91.2162	0.507076	0.0213472	0.0141524	0.978522		987	5
	BIOHIT	R=.5 / Pg1=80	9	0.00861244		994	7	42	2		4.54545	99.3007	22.2222	95.9459	0.519231	0.0451367	0.0384615	0.954571		998	7	38	2		5	99.3035	22.2222	96.332	0.521517	0.0496517	0.0430348	0.950026		945	7	91	2		2.15054	99.2647	22.2222	91.2162	0.507076	0.0213472	0.0141524	0.978522		987	5
	BIOHIT	R=.5 / Pg1=85	9	0.00861244		994	7	42	2		4.54545	99.3007	22.2222	95.9459	0.519231	0.0451367	0.0384615	0.954571		998	7	38	2		5	99.3035	22.2222	96.332	0.521517	0.0496517	0.0430348	0.950026		945	7	91	2		2.15054	99.2647	22.2222	91.2162	0.507076	0.0213472	0.0141524	0.978522		987	5
	BIOHIT	R=.5 / Pg1=90	9	0.00861244		994	7	42	2		4.54545	99.3007	22.2222	95.9459	0.519231	0.0451367	0.0384615	0.954571		998	7	38	2		5	99.3035	22.2222	96.332	0.521517	0.0496517	0.0430348	0.950026		945	7	91	2		2.15054	99.2647	22.2222	91.2162	0.507076	0.0213472	0.0141524	0.978522		987	5
	BIOHIT	R=.5 / Pg1=95	9	0.00861244		994	7	42	2		4.54545	99.3007	22.2222	95.9459	0.519231	0.0451367	0.0384615	0.954571		998	7	38	2		5	99.3035	22.2222	96.332	0.521517	0.0496517	0.0430348	0.950026		945	7	91	2		2.15054	99.2647	22.2222	91.2162	0.507076	0.0213472	0.0141524	0.978522		987	5
	BIOHIT	R=.5 / Pg1=100	9	0.00861244		994	7	42	2		4.54545	99.3007	22.2222	95.9459	0.519231	0.0451367	0.0384615	0.954571		998	7	38	2		5	99.3035	22.2222	96.332	0.521517	0.0496517	0.0430348	0.950026		945	7	91	2		2.15054	99.2647	22.2222	91.2162	0.507076	0.0213472	0.0141524	0.978522		987	5
	BIOHIT	R=.5 / Pg1=105	9	0.00861244		994	7	42	2		4.54545	99.3007	22.2222	95.9459	0.519231	0.0451367	0.0384615	0.954571		998	7	38	2		5	99.3035	22.2222	96.332	0.521517	0.0496517	0.0430348	0.950026		945	7	91	2		2.15054	99.2647	22.2222	91.2162	0.507076	0.0213472	0.0141524	0.978522		987	5
	BIOHIT	R=.5 / Pg1=110	9	0.00861244		994	7	42	2		4.54545	99.3007	22.2222	95.9459	0.519231	0.0451367	0.0384615	0.954571		998	7	38	2		5	99.3035	22.2222	96.332	0.521517	0.0496517	0.0430348	0.950026		945	7	91	2		2.15054	99.2647	22.2222	91.2162	0.507076	0.0213472	0.0141524	0.978522		987	5
	BIOHIT	R=.5 / Pg1=115	9	0.00861244		994	7	42	2		4.54545	99.3007	22.2222	95.9459	0.519231	0.0451367	0.0384615	0.954571		998	7	38	2		5	99.3035	22.2222	96.332	0.521517	0.0496517	0.0430348	0.950026		945	7	91	2		2.15054	99.2647	22.2222	91.2162	0.507076	0.0213472	0.0141524	0.978522		987	5
	BIOHIT	R=.5 / Pg1=120	9	0.00861244		994	7	42	2		4.54545	99.3007	22.2222	95.9459	0.519231	0.0451367	0.0384615	0.954571		998	7	38	2		5	99.3035	22.2222	96.332	0.521517	0.0496517	0.0430348	0.950026		945	7	91	2		2.15054	99.2647	22.2222	91.2162	0.507076	0.0213472	0.0141524	0.978522		987	5
	BIOHIT	R=.5 / Pg1=125	9	0.00861244		994	7	42	2		4.54545	99.3007	22.2222	95.9459	0.519231	0.0451367	0.0384615	0.954571		998	7	38	2		5	99.3035	22.2222	96.332	0.521517	0.0496517	0.0430348	0.950026		945	7	91	2		2.15054	99.2647	22.2222	91.2162	0.507076	0.0213472	0.0141524	0.978522		987	5
	BIOHIT	R=.5 / Pg1=130	9	0.00861244		994	7	42	2		4.54545	99.3007	22.2222	95.9459	0.519231	0.0451367	0.0384615	0.954571		998	7	38	2		5	99.3035	22.2222	96.332	0.521517	0.0496517	0.0430348	0.950026		945	7	91	2		2.15054	99.2647	22.2222	91.2162	0.507076	0.0213472	0.0141524	0.978522		987	5
	BIOHIT	R=.5 / Pg1=135	9	0.00861244		994	7	42	2		4.54545	99.3007	22.2222	95.9459	0.519231	0.0451367	0.0384615	0.954571		998	7	38	2		5	99.3035	22.2222	96.332	0.521517	0.0496517	0.0430348	0.950026		945	7	91	2		2.15054	99.2647	22.2222	91.2162	0.507076	0.0213472	0.0141524	0.978522		987	5
	BIOHIT	R=.5 / Pg1=140	9	0.00861244		994	7	42	2		4.54545	99.3007	22.2222	95.9459	0.519231	0.0451367	0.0384615	0.954571		998	7	38	2		5	99.3035	22.2222	96.332	0.521517	0.0496517	0.0430348	0.950026		945	7	91	2		2.15054	99.2647	22.2222	91.2162	0.507076	0.0213472	0.0141524	0.978522		987	5
	BIOHIT	R=.5 / Pg1=145	9	0.00861244		994	7	42	2		4.54545	99.3007	22.2222	95.9459	0.519231	0.0451367	0.0384615	0.954571		998	7	38	2		5	99.3035	22.2222	96.332	0.521517	0.0496517	0.0430348	0.950026		945	7	91	2		2.15054	99.2647	22.2222	91.2162	0.507076	0.0213472	0.0141524	0.978522		987	5
	BIOHIT	R=.5 / Pg1=150	9	0.00861244		994	7	42	2		4.54545	99.3007	22.2222	95.9459	0.519231	0.0451367	0.0384615	0.954571		998	7	38	2		5	99.3035	22.2222	96.332	0.521517	0.0496517	0.0430348	0.950026		945	7	91	2		2.15054	99.2647	22.2222	91.2162	0.507076	0.0213472	0.0141524	0.978522		987	5
	BIOHIT	R=1 / Pg1=0	2	0.00191388		1000	1	43	1		2.27273	99.9001	50	95.8773	0.510864	0.0227046	0.0217283	0.977273		1004	1	39	1		2.5	99.9005	50	96.2608	0.512002	0.0249751	0.024005	0.975001		951	1	92	1		1.07527	99.895	50	91.1793	0.504851	0.0107414	0.00970227	0.989248		992	0
	BIOHIT	R=1 / Pg1=5	11	0.0105263		995	6	39	5		11.3636	99.4006	45.4545	96.2282	0.553821	0.112955	0.107642	0.886384		998	7	36	4		10	99.3035	36.3636	96.5184	0.546517	0.0993035	0.0930348	0.900027		946	6	88	5		5.37634	99.3697	45.4545	91.4894	0.52373	0.0534246	0.0474609	0.946258		988	4
	BIOHIT	R=1 / Pg1=10	16	0.015311		990	11	39	5		11.3636	98.9011	31.25	96.2099	0.551324	0.112388	0.102647	0.886432		993	12	36	4		10	98.806	25	96.5015	0.54403	0.098806	0.0880597	0.900079		941	11	88	5		5.37634	98.8445	31.25	91.448	0.521104	0.0531422	0.0422088	0.946307		983	9
	BIOHIT	R=1 / Pg1=15	16	0.015311		990	11	39	5		11.3636	98.9011	31.25	96.2099	0.551324	0.112388	0.102647	0.886432		993	12	36	4		10	98.806	25	96.5015	0.54403	0.098806	0.0880597	0.900079		941	11	88	5		5.37634	98.8445	31.25	91.448	0.521104	0.0531422	0.0422088	0.946307		983	9
	BIOHIT	R=1 / Pg1=20	17	0.0162679		989	12	39	5		11.3636	98.8012	29.4118	96.2062	0.550824	0.112274	0.101648	0.886445		992	13	36	4		10	98.7065	23.5294	96.4981	0.543532	0.0987065	0.0870647	0.900093		940	12	88	5		5.37634	98.7395	29.4118	91.4397	0.520579	0.0530858	0.0411584	0.946321		982	10
	BIOHIT	R=1 / Pg1=25	18	0.0172249		988	13	39	5		11.3636	98.7013	27.7778	96.2025	0.550325	0.112161	0.100649	0.886459		991	14	36	4		10	98.607	22.2222	96.4946	0.543035	0.098607	0.0860697	0.900108		939	13	88	5		5.37634	98.6345	27.7778	91.4314	0.520054	0.0530293	0.040108	0.946335		981	11
	BIOHIT	R=1 / Pg1=30	18	0.0172249		988	13	39	5		11.3636	98.7013	27.7778	96.2025	0.550325	0.112161	0.100649	0.886459		991	14	36	4		10	98.607	22.2222	96.4946	0.543035	0.098607	0.0860697	0.900108		939	13	88	5		5.37634	98.6345	27.7778	91.4314	0.520054	0.0530293	0.040108	0.946335		981	11
	BIOHIT	R=1 / Pg1=35	19	0.0181818		987	14	39	5		11.3636	98.6014	26.3158	96.1988	0.549825	0.112047	0.0996503	0.886474		990	15	36	4		10	98.5075	21.0526	96.4912	0.542537	0.0985075	0.0850746	0.900124		938	14	88	5		5.37634	98.5294	26.3158	91.423	0.519529	0.0529728	0.0390576	0.946351		980	12
	BIOHIT	R=1 / Pg1=40	19	0.0181818		987	14	39	5		11.3636	98.6014	26.3158	96.1988	0.549825	0.112047	0.0996503	0.886474		990	15	36	4		10	98.5075	21.0526	96.4912	0.542537	0.0985075	0.0850746	0.900124		938	14	88	5		5.37634	98.5294	26.3158	91.423	0.519529	0.0529728	0.0390576	0.946351		980	12
	BIOHIT	R=1 / Pg1=45	19	0.0181818		987	14	39	5		11.3636	98.6014	26.3158	96.1988	0.549825	0.112047	0.0996503	0.886474		990	15	36	4		10	98.5075	21.0526	96.4912	0.542537	0.0985075	0.0850746	0.900124		938	14	88	5		5.37634	98.5294	26.3158	91.423	0.519529	0.0529728	0.0390576	0.946351		980	12
	BIOHIT	R=1 / Pg1=50	19	0.0181818		987	14	39	5		11.3636	98.6014	26.3158	96.1988	0.549825	0.112047	0.0996503	0.886474		990	15	36	4		10	98.5075	21.0526	96.4912	0.542537	0.0985075	0.0850746	0.900124		938	14	88	5		5.37634	98.5294	26.3158	91.423	0.519529	0.0529728	0.0390576	0.946351		980	12
	BIOHIT	R=1 / Pg1=55	20	0.0191388		986	15	39	5		11.3636	98.5015	25	96.1951	0.549326	0.111934	0.0986513	0.88649		989	16	36	4		10	98.408	20	96.4878	0.54204	0.098408	0.0840796	0.900141		937	15	88	5		5.37634	98.4244	25	91.4146	0.519004	0.0529163	0.0380071	0.946368		979	13
	BIOHIT	R=1 / Pg1=60	20	0.0191388		986	15	39	5		11.3636	98.5015	25	96.1951	0.549326	0.111934	0.0986513	0.88649		989	16	36	4		10	98.408	20	96.4878	0.54204	0.098408	0.0840796	0.900141		937	15	88	5		5.37634	98.4244	25	91.4146	0.519004	0.0529163	0.0380071	0.946368		979	13
	BIOHIT	R=1 / Pg1=65	20	0.0191388		986	15	39	5		11.3636	98.5015	25	96.1951	0.549326	0.111934	0.0986513	0.88649		989	16	36	4		10	98.408	20	96.4878	0.54204	0.098408	0.0840796	0.900141		937	15	88	5		5.37634	98.4244	25	91.4146	0.519004	0.0529163	0.0380071	0.946368		979	13
	BIOHIT	R=1 / Pg1=70	20	0.0191388		986	15	39	5		11.3636	98.5015	25	96.1951	0.549326	0.111934	0.0986513	0.88649		989	16	36	4		10	98.408	20	96.4878	0.54204	0.098408	0.0840796	0.900141		937	15	88	5		5.37634	98.4244	25	91.4146	0.519004	0.0529163	0.0380071	0.946368		979	13
	BIOHIT	R=1 / Pg1=75	20	0.0191388		986	15	39	5		11.3636	98.5015	25	96.1951	0.549326	0.111934	0.0986513	0.88649		989	16	36	4		10	98.408	20	96.4878	0.54204	0.098408	0.0840796	0.900141		937	15	88	5		5.37634	98.4244	25	91.4146	0.519004	0.0529163	0.0380071	0.946368		979	13
	BIOHIT	R=1 / Pg1=80	20	0.0191388		986	15	39	5		11.3636	98.5015	25	96.1951	0.549326	0.111934	0.0986513	0.88649		989	16	36	4		10	98.408	20	96.4878	0.54204	0.098408	0.0840796	0.900141		937	15	88	5		5.37634	98.4244	25	91.4146	0.519004	0.0529163	0.0380071	0.946368		979	13
	BIOHIT	R=1 / Pg1=85	20	0.0191388		986	15	39	5		11.3636	98.5015	25	96.1951	0.549326	0.111934	0.0986513	0.88649		989	16	36	4		10	98.408	20	96.4878	0.54204	0.098408	0.0840796	0.900141		937	15	88	5		5.37634	98.4244	25	91.4146	0.519004	0.0529163	0.0380071	0.946368		979	13
	BIOHIT	R=1 / Pg1=90	20	0.0191388		986	15	39	5		11.3636	98.5015	25	96.1951	0.549326	0.111934	0.0986513	0.88649		989	16	36	4		10	98.408	20	96.4878	0.54204	0.098408	0.0840796	0.900141		937	15	88	5		5.37634	98.4244	25	91.4146	0.519004	0.0529163	0.0380071	0.946368		979	13
	BIOHIT	R=1 / Pg1=95	20	0.0191388		986	15	39	5		11.3636	98.5015	25	96.1951	0.549326	0.111934	0.0986513	0.88649		989	16	36	4		10	98.408	20	96.4878	0.54204	0.098408	0.0840796	0.900141		937	15	88	5		5.37634	98.4244	25	91.4146	0.519004	0.0529163	0.0380071	0.946368		979	13
	BIOHIT	R=1 / Pg1=100	20	0.0191388		986	15	39	5		11.3636	98.5015	25	96.1951	0.549326	0.111934	0.0986513	0.88649		989	16	36	4		10	98.408	20	96.4878	0.54204	0.098408	0.0840796	0.900141		937	15	88	5		5.37634	98.4244	25	91.4146	0.519004	0.0529163	0.0380071	0.946368		979	13
	BIOHIT	R=1 / Pg1=105	20	0.0191388		986	15	39	5		11.3636	98.5015	25	96.1951	0.549326	0.111934	0.0986513	0.88649		989	16	36	4		10	98.408	20	96.4878	0.54204	0.098408	0.0840796	0.900141		937	15	88	5		5.37634	98.4244	25	91.4146	0.519004	0.0529163	0.0380071	0.946368		979	13
	BIOHIT	R=1 / Pg1=110	20	0.0191388		986	15	39	5		11.3636	98.5015	25	96.1951	0.549326	0.111934	0.0986513	0.88649		989	16	36	4		10	98.408	20	96.4878	0.54204	0.098408	0.0840796	0.900141		937	15	88	5		5.37634	98.4244	25	91.4146	0.519004	0.0529163	0.0380071	0.946368		979	13
	BIOHIT	R=1 / Pg1=115	20	0.0191388		986	15	39	5		11.3636	98.5015	25	96.1951	0.549326	0.111934	0.0986513	0.88649		989	16	36	4		10	98.408	20	96.4878	0.54204	0.098408	0.0840796	0.900141		937	15	88	5		5.37634	98.4244	25	91.4146	0.519004	0.0529163	0.0380071	0.946368		979	13
	BIOHIT	R=1 / Pg1=120	21	0.0200957		985	16	39	5		11.3636	98.4016	23.8095	96.1914	0.548826	0.11182	0.0976523	0.886508		988	17	36	4		10	98.3085	19.0476	96.4844	0.541542	0.0983085	0.0830846	0.900159		936	16	88	5		5.37634	98.3193	23.8095	91.4062	0.518478	0.0528599	0.0369567	0.946386		978	14
	BIOHIT	R=1 / Pg1=125	21	0.0200957		985	16	39	5		11.3636	98.4016	23.8095	96.1914	0.548826	0.11182	0.0976523	0.886508		988	17	36	4		10	98.3085	19.0476	96.4844	0.541542	0.0983085	0.0830846	0.900159		936	16	88	5		5.37634	98.3193	23.8095	91.4062	0.518478	0.0528599	0.0369567	0.946386		978	14
	BIOHIT	R=1 / Pg1=130	21	0.0200957		985	16	39	5		11.3636	98.4016	23.8095	96.1914	0.548826	0.11182	0.0976523	0.886508		988	17	36	4		10	98.3085	19.0476	96.4844	0.541542	0.0983085	0.0830846	0.900159		936	16	88	5		5.37634	98.3193	23.8095	91.4062	0.518478	0.0528599	0.0369567	0.946386		978	14
	BIOHIT	R=1 / Pg1=135	21	0.0200957		985	16	39	5		11.3636	98.4016	23.8095	96.1914	0.548826	0.11182	0.0976523	0.886508		988	17	36	4		10	98.3085	19.0476	96.4844	0.541542	0.0983085	0.0830846	0.900159		936	16	88	5		5.37634	98.3193	23.8095	91.4062	0.518478	0.0528599	0.0369567	0.946386		978	14
	BIOHIT	R=1 / Pg1=140	21	0.0200957		985	16	39	5		11.3636	98.4016	23.8095	96.1914	0.548826	0.11182	0.0976523	0.886508		988	17	36	4		10	98.3085	19.0476	96.4844	0.541542	0.0983085	0.0830846	0.900159		936	16	88	5		5.37634	98.3193	23.8095	91.4062	0.518478	0.0528599	0.0369567	0.946386		978	14
	BIOHIT	R=1 / Pg1=145	21	0.0200957		985	16	39	5		11.3636	98.4016	23.8095	96.1914	0.548826	0.11182	0.0976523	0.886508		988	17	36	4		10	98.3085	19.0476	96.4844	0.541542	0.0983085	0.0830846	0.900159		936	16	88	5		5.37634	98.3193	23.8095	91.4062	0.518478	0.0528599	0.0369567	0.946386		978	14
	BIOHIT	R=1 / Pg1=150	21	0.0200957		985	16	39	5		11.3636	98.4016	23.8095	96.1914	0.548826	0.11182	0.0976523	0.886508		988	17	36	4		10	98.3085	19.0476	96.4844	0.541542	0.0983085	0.0830846	0.900159		936	16	88	5		5.37634	98.3193	23.8095	91.4062	0.518478	0.0528599	0.0369567	0.946386		978	14
	BIOHIT	R=1.5 / Pg1=0	2	0.00191388		1000	1	43	1		2.27273	99.9001	50	95.8773	0.510864	0.0227046	0.0217283	0.977273		1004	1	39	1		2.5	99.9005	50	96.2608	0.512002	0.0249751	0.024005	0.975001		951	1	92	1		1.07527	99.895	50	91.1793	0.504851	0.0107414	0.00970227	0.989248		992	0
	BIOHIT	R=1.5 / Pg1=5	12	0.0114833		995	6	38	6		13.6364	99.4006	50	96.3214	0.565185	0.135546	0.13037	0.863657		998	7	35	5		12.5	99.3035	41.6667	96.6118	0.559017	0.124129	0.118035	0.875028		946	6	87	6		6.45161	99.3697	50	91.5779	0.529107	0.0641095	0.0582136	0.935505		988	4
	BIOHIT	R=1.5 / Pg1=10	28	0.0267943		980	21	37	7		15.9091	97.9021	25	96.3618	0.569056	0.155753	0.138112	0.841171		983	22	34	6		15	97.8109	21.4286	96.6568	0.564055	0.146716	0.128109	0.850282		932	20	85	8		8.60215	97.8992	28.5714	91.6421	0.532507	0.0842143	0.0650131	0.91422		978	14
	BIOHIT	R=1.5 / Pg1=15	33	0.0315789		977	24	35	9		20.4545	97.6024	27.2727	96.5415	0.590285	0.199641	0.180569	0.795816		980	25	32	8		20	97.5124	24.2424	96.8379	0.587562	0.195025	0.175124	0.800387		930	22	82	11		11.828	97.6891	33.3333	91.8972	0.547585	0.115546	0.0951703	0.882023		976	16
	BIOHIT	R=1.5 / Pg1=20	38	0.0363636		972	29	35	9		20.4545	97.1029	23.6842	96.5243	0.587787	0.19862	0.175574	0.795982		975	30	32	8		20	97.0149	21.0526	96.8222	0.585075	0.19403	0.170149	0.800557		925	27	82	11		11.828	97.1639	28.9474	91.857	0.544959	0.114925	0.0899182	0.882176		971	21
	BIOHIT	R=1.5 / Pg1=25	41	0.0392344		969	32	35	9		20.4545	96.8032	21.9512	96.5139	0.586289	0.198007	0.172577	0.796097		972	33	32	8		20	96.7164	19.5122	96.8127	0.583582	0.193433	0.167164	0.800674		922	30	82	11		11.828	96.8487	26.8293	91.8327	0.543383	0.114552	0.086767	0.882283		968	24
	BIOHIT	R=1.5 / Pg1=30	42	0.0401914		969	32	34	10		22.7273	96.8032	23.8095	96.6102	0.597652	0.220007	0.195305	0.773388		972	33	31	9		22.5	96.7164	21.4286	96.9093	0.596082	0.217612	0.192164	0.775695		922	30	81	12		12.9032	96.8487	28.5714	91.9242	0.54876	0.124966	0.0975197	0.871538		968	24
	BIOHIT	R=1.5 / Pg1=35	43	0.0411483		968	33	34	10		22.7273	96.7033	23.2558	96.6068	0.597153	0.21978	0.194306	0.77343		971	34	31	9		22.5	96.6169	20.9302	96.9062	0.595585	0.217388	0.191169	0.775738		921	31	81	12		12.9032	96.7437	27.907	91.9162	0.548235	0.124831	0.0964692	0.871576		967	25
	BIOHIT	R=1.5 / Pg1=40	43	0.0411483		968	33	34	10		22.7273	96.7033	23.2558	96.6068	0.597153	0.21978	0.194306	0.77343		971	34	31	9		22.5	96.6169	20.9302	96.9062	0.595585	0.217388	0.191169	0.775738		921	31	81	12		12.9032	96.7437	27.907	91.9162	0.548235	0.124831	0.0964692	0.871576		967	25
	BIOHIT	R=1.5 / Pg1=45	43	0.0411483		968	33	34	10		22.7273	96.7033	23.2558	96.6068	0.597153	0.21978	0.194306	0.77343		971	34	31	9		22.5	96.6169	20.9302	96.9062	0.595585	0.217388	0.191169	0.775738		921	31	81	12		12.9032	96.7437	27.907	91.9162	0.548235	0.124831	0.0964692	0.871576		967	25
	BIOHIT	R=1.5 / Pg1=50	43	0.0411483		968	33	34	10		22.7273	96.7033	23.2558	96.6068	0.597153	0.21978	0.194306	0.77343		971	34	31	9		22.5	96.6169	20.9302	96.9062	0.595585	0.217388	0.191169	0.775738		921	31	81	12		12.9032	96.7437	27.907	91.9162	0.548235	0.124831	0.0964692	0.871576		967	25
	BIOHIT	R=1.5 / Pg1=55	45	0.0430622		966	35	34	10		22.7273	96.5035	22.2222	96.6	0.596154	0.219326	0.192308	0.773518		969	36	31	9		22.5	96.4179	20	96.9	0.59459	0.21694	0.189179	0.775827		920	32	80	13		13.9785	96.6387	28.8889	92	0.553086	0.135086	0.106172	0.860872		965	27
	BIOHIT	R=1.5 / Pg1=60	45	0.0430622		966	35	34	10		22.7273	96.5035	22.2222	96.6	0.596154	0.219326	0.192308	0.773518		969	36	31	9		22.5	96.4179	20	96.9	0.59459	0.21694	0.189179	0.775827		920	32	80	13		13.9785	96.6387	28.8889	92	0.553086	0.135086	0.106172	0.860872		965	27
	BIOHIT	R=1.5 / Pg1=65	45	0.0430622		966	35	34	10		22.7273	96.5035	22.2222	96.6	0.596154	0.219326	0.192308	0.773518		969	36	31	9		22.5	96.4179	20	96.9	0.59459	0.21694	0.189179	0.775827		920	32	80	13		13.9785	96.6387	28.8889	92	0.553086	0.135086	0.106172	0.860872		965	27
	BIOHIT	R=1.5 / Pg1=70	45	0.0430622		966	35	34	10		22.7273	96.5035	22.2222	96.6	0.596154	0.219326	0.192308	0.773518		969	36	31	9		22.5	96.4179	20	96.9	0.59459	0.21694	0.189179	0.775827		920	32	80	13		13.9785	96.6387	28.8889	92	0.553086	0.135086	0.106172	0.860872		965	27
	BIOHIT	R=1.5 / Pg1=75	45	0.0430622		966	35	34	10		22.7273	96.5035	22.2222	96.6	0.596154	0.219326	0.192308	0.773518		969	36	31	9		22.5	96.4179	20	96.9	0.59459	0.21694	0.189179	0.775827		920	32	80	13		13.9785	96.6387	28.8889	92	0.553086	0.135086	0.106172	0.860872		965	27
	BIOHIT	R=1.5 / Pg1=80	46	0.0440191		965	36	34	10		22.7273	96.4036	21.7391	96.5966	0.595654	0.219099	0.191309	0.773564		968	37	31	9		22.5	96.3184	19.5652	96.8969	0.594092	0.216716	0.188184	0.775874		919	33	80	13		13.9785	96.5336	28.2609	91.992	0.552561	0.134939	0.105121	0.860913		964	28
	BIOHIT	R=1.5 / Pg1=85	46	0.0440191		965	36	34	10		22.7273	96.4036	21.7391	96.5966	0.595654	0.219099	0.191309	0.773564		968	37	31	9		22.5	96.3184	19.5652	96.8969	0.594092	0.216716	0.188184	0.775874		919	33	80	13		13.9785	96.5336	28.2609	91.992	0.552561	0.134939	0.105121	0.860913		964	28
	BIOHIT	R=1.5 / Pg1=90	46	0.0440191		965	36	34	10		22.7273	96.4036	21.7391	96.5966	0.595654	0.219099	0.191309	0.773564		968	37	31	9		22.5	96.3184	19.5652	96.8969	0.594092	0.216716	0.188184	0.775874		919	33	80	13		13.9785	96.5336	28.2609	91.992	0.552561	0.134939	0.105121	0.860913		964	28
	BIOHIT	R=1.5 / Pg1=95	46	0.0440191		965	36	34	10		22.7273	96.4036	21.7391	96.5966	0.595654	0.219099	0.191309	0.773564		968	37	31	9		22.5	96.3184	19.5652	96.8969	0.594092	0.216716	0.188184	0.775874		919	33	80	13		13.9785	96.5336	28.2609	91.992	0.552561	0.134939	0.105121	0.860913		964	28
	BIOHIT	R=1.5 / Pg1=100	46	0.0440191		965	36	34	10		22.7273	96.4036	21.7391	96.5966	0.595654	0.219099	0.191309	0.773564		968	37	31	9		22.5	96.3184	19.5652	96.8969	0.594092	0.216716	0.188184	0.775874		919	33	80	13		13.9785	96.5336	28.2609	91.992	0.552561	0.134939	0.105121	0.860913		964	28
	BIOHIT	R=1.5 / Pg1=105	46	0.0440191		965	36	34	10		22.7273	96.4036	21.7391	96.5966	0.595654	0.219099	0.191309	0.773564		968	37	31	9		22.5	96.3184	19.5652	96.8969	0.594092	0.216716	0.188184	0.775874		919	33	80	13		13.9785	96.5336	28.2609	91.992	0.552561	0.134939	0.105121	0.860913		964	28
	BIOHIT	R=1.5 / Pg1=110	46	0.0440191		965	36	34	10		22.7273	96.4036	21.7391	96.5966	0.595654	0.219099	0.191309	0.773564		968	37	31	9		22.5	96.3184	19.5652	96.8969	0.594092	0.216716	0.188184	0.775874		919	33	80	13		13.9785	96.5336	28.2609	91.992	0.552561	0.134939	0.105121	0.860913		964	28
	BIOHIT	R=1.5 / Pg1=115	46	0.0440191		965	36	34	10		22.7273	96.4036	21.7391	96.5966	0.595654	0.219099	0.191309	0.773564		968	37	31	9		22.5	96.3184	19.5652	96.8969	0.594092	0.216716	0.188184	0.775874		919	33	80	13		13.9785	96.5336	28.2609	91.992	0.552561	0.134939	0.105121	0.860913		964	28
	BIOHIT	R=1.5 / Pg1=120	47	0.0449761		964	37	34	10		22.7273	96.3037	21.2766	96.5932	0.595155	0.218872	0.19031	0.773611		967	38	31	9		22.5	96.2189	19.1489	96.8938	0.593595	0.216493	0.187189	0.775922		918	34	80	13		13.9785	96.4286	27.6596	91.984	0.552035	0.134793	0.104071	0.860956		963	29
	BIOHIT	R=1.5 / Pg1=125	47	0.0449761		964	37	34	10		22.7273	96.3037	21.2766	96.5932	0.595155	0.218872	0.19031	0.773611		967	38	31	9		22.5	96.2189	19.1489	96.8938	0.593595	0.216493	0.187189	0.775922		918	34	80	13		13.9785	96.4286	27.6596	91.984	0.552035	0.134793	0.104071	0.860956		963	29
	BIOHIT	R=1.5 / Pg1=130	47	0.0449761		964	37	34	10		22.7273	96.3037	21.2766	96.5932	0.595155	0.218872	0.19031	0.773611		967	38	31	9		22.5	96.2189	19.1489	96.8938	0.593595	0.216493	0.187189	0.775922		918	34	80	13		13.9785	96.4286	27.6596	91.984	0.552035	0.134793	0.104071	0.860956		963	29
	BIOHIT	R=1.5 / Pg1=135	47	0.0449761		964	37	34	10		22.7273	96.3037	21.2766	96.5932	0.595155	0.218872	0.19031	0.773611		967	38	31	9		22.5	96.2189	19.1489	96.8938	0.593595	0.216493	0.187189	0.775922		918	34	80	13		13.9785	96.4286	27.6596	91.984	0.552035	0.134793	0.104071	0.860956		963	29
	BIOHIT	R=1.5 / Pg1=140	47	0.0449761		964	37	34	10		22.7273	96.3037	21.2766	96.5932	0.595155	0.218872	0.19031	0.773611		967	38	31	9		22.5	96.2189	19.1489	96.8938	0.593595	0.216493	0.187189	0.775922		918	34	80	13		13.9785	96.4286	27.6596	91.984	0.552035	0.134793	0.104071	0.860956		963	29
	BIOHIT	R=1.5 / Pg1=145	47	0.0449761		964	37	34	10		22.7273	96.3037	21.2766	96.5932	0.595155	0.218872	0.19031	0.773611		967	38	31	9		22.5	96.2189	19.1489	96.8938	0.593595	0.216493	0.187189	0.775922		918	34	80	13		13.9785	96.4286	27.6596	91.984	0.552035	0.134793	0.104071	0.860956		963	29
	BIOHIT	R=1.5 / Pg1=150	47	0.0449761		964	37	34	10		22.7273	96.3037	21.2766	96.5932	0.595155	0.218872	0.19031	0.773611		967	38	31	9		22.5	96.2189	19.1489	96.8938	0.593595	0.216493	0.187189	0.775922		918	34	80	13		13.9785	96.4286	27.6596	91.984	0.552035	0.134793	0.104071	0.860956		963	29
	BIOHIT	R=2 / Pg1=0	2	0.00191388		1000	1	43	1		2.27273	99.9001	50	95.8773	0.510864	0.0227046	0.0217283	0.977273		1004	1	39	1		2.5	99.9005	50	96.2608	0.512002	0.0249751	0.024005	0.975001		951	1	92	1		1.07527	99.895	50	91.1793	0.504851	0.0107414	0.00970227	0.989248		992	0
	BIOHIT	R=2 / Pg1=5	12	0.0114833		995	6	38	6		13.6364	99.4006	50	96.3214	0.565185	0.135546	0.13037	0.863657		998	7	35	5		12.5	99.3035	41.6667	96.6118	0.559017	0.124129	0.118035	0.875028		946	6	87	6		6.45161	99.3697	50	91.5779	0.529107	0.0641095	0.0582136	0.935505		988	4
	BIOHIT	R=2 / Pg1=10	29	0.0277512		979	22	37	7		15.9091	97.8022	24.1379	96.3583	0.568556	0.155594	0.137113	0.841196		982	23	34	6		15	97.7114	20.6897	96.6535	0.563557	0.146567	0.127114	0.850308		931	21	85	8		8.60215	97.7941	27.5862	91.6339	0.531981	0.084124	0.0639627	0.914245		977	15
	BIOHIT	R=2 / Pg1=15	38	0.0363636		972	29	35	9		20.4545	97.1029	23.6842	96.5243	0.587787	0.19862	0.175574	0.795982		975	30	32	8		20	97.0149	21.0526	96.8222	0.585075	0.19403	0.170149	0.800557		925	27	82	11		11.828	97.1639	28.9474	91.857	0.544959	0.114925	0.0899182	0.882176		972	20
	BIOHIT	R=2 / Pg1=20	48	0.045933		962	39	35	9		20.4545	96.1039	18.75	96.4895	0.582792	0.196576	0.165584	0.796408		965	40	32	8		20	96.0199	16.6667	96.7904	0.5801	0.19204	0.160199	0.800989		915	37	82	11		11.828	96.1134	22.9167	91.7753	0.539707	0.113683	0.079414	0.882577		963	29
	BIOHIT	R=2 / Pg1=25	51	0.0488038		959	42	35	9		20.4545	95.8042	17.6471	96.4789	0.581294	0.195963	0.162587	0.79656		962	43	32	8		20	95.7214	15.6863	96.7807	0.578607	0.191443	0.157214	0.801143		912	40	82	11		11.828	95.7983	21.5686	91.7505	0.538131	0.11331	0.0762628	0.882721		960	32
	BIOHIT	R=2 / Pg1=30	52	0.0497608		959	42	34	10		22.7273	95.8042	19.2308	96.576	0.592657	0.217737	0.185315	0.773866		962	43	31	9		22.5	95.7214	17.3077	96.8781	0.591107	0.215373	0.182214	0.77618		912	40	81	12		12.9032	95.7983	23.0769	91.8429	0.543508	0.123611	0.0870155	0.871981		960	32
	BIOHIT	R=2 / Pg1=35	54	0.0516746		957	44	34	10		22.7273	95.6044	18.5185	96.5691	0.591658	0.217283	0.183317	0.773976		960	45	31	9		22.5	95.5224	16.6667	96.8718	0.590112	0.214925	0.180224	0.776292		910	42	81	12		12.9032	95.5882	22.2222	91.8264	0.542457	0.12334	0.0849146	0.872084		958	34
	BIOHIT	R=2 / Pg1=40	55	0.0526316		956	45	34	10		22.7273	95.5045	18.1818	96.5657	0.591159	0.217056	0.182318	0.774034		959	46	31	9		22.5	95.4229	16.3636	96.8687	0.589614	0.214701	0.179229	0.77635		909	43	81	12		12.9032	95.4832	21.8182	91.8182	0.541932	0.123204	0.0838642	0.872138		957	35
	BIOHIT	R=2 / Pg1=45	55	0.0526316		956	45	34	10		22.7273	95.5045	18.1818	96.5657	0.591159	0.217056	0.182318	0.774034		959	46	31	9		22.5	95.4229	16.3636	96.8687	0.589614	0.214701	0.179229	0.77635		909	43	81	12		12.9032	95.4832	21.8182	91.8182	0.541932	0.123204	0.0838642	0.872138		957	35
	BIOHIT	R=2 / Pg1=50	55	0.0526316		956	45	34	10		22.7273	95.5045	18.1818	96.5657	0.591159	0.217056	0.182318	0.774034		959	46	31	9		22.5	95.4229	16.3636	96.8687	0.589614	0.214701	0.179229	0.77635		909	43	81	12		12.9032	95.4832	21.8182	91.8182	0.541932	0.123204	0.0838642	0.872138		957	35
	BIOHIT	R=2 / Pg1=55	57	0.0545455		954	47	34	10		22.7273	95.3047	17.5439	96.5587	0.59016	0.216602	0.18032	0.774152		957	48	31	9		22.5	95.2239	15.7895	96.8623	0.588619	0.214254	0.177239	0.77647		908	44	80	13		13.9785	95.3782	22.807	91.9028	0.546783	0.133324	0.0935665	0.861456		955	37
	BIOHIT	R=2 / Pg1=60	57	0.0545455		954	47	34	10		22.7273	95.3047	17.5439	96.5587	0.59016	0.216602	0.18032	0.774152		957	48	31	9		22.5	95.2239	15.7895	96.8623	0.588619	0.214254	0.177239	0.77647		908	44	80	13		13.9785	95.3782	22.807	91.9028	0.546783	0.133324	0.0935665	0.861456		955	37
	BIOHIT	R=2 / Pg1=65	57	0.0545455		954	47	34	10		22.7273	95.3047	17.5439	96.5587	0.59016	0.216602	0.18032	0.774152		957	48	31	9		22.5	95.2239	15.7895	96.8623	0.588619	0.214254	0.177239	0.77647		908	44	80	13		13.9785	95.3782	22.807	91.9028	0.546783	0.133324	0.0935665	0.861456		955	37
	BIOHIT	R=2 / Pg1=70	57	0.0545455		954	47	34	10		22.7273	95.3047	17.5439	96.5587	0.59016	0.216602	0.18032	0.774152		957	48	31	9		22.5	95.2239	15.7895	96.8623	0.588619	0.214254	0.177239	0.77647		908	44	80	13		13.9785	95.3782	22.807	91.9028	0.546783	0.133324	0.0935665	0.861456		955	37
	BIOHIT	R=2 / Pg1=75	57	0.0545455		954	47	34	10		22.7273	95.3047	17.5439	96.5587	0.59016	0.216602	0.18032	0.774152		957	48	31	9		22.5	95.2239	15.7895	96.8623	0.588619	0.214254	0.177239	0.77647		908	44	80	13		13.9785	95.3782	22.807	91.9028	0.546783	0.133324	0.0935665	0.861456		955	37
	BIOHIT	R=2 / Pg1=80	58	0.0555024		953	48	34	10		22.7273	95.2048	17.2414	96.5552	0.58966	0.216375	0.179321	0.774214		956	49	31	9		22.5	95.1244	15.5172	96.8592	0.588122	0.21403	0.176244	0.776532		907	45	80	13		13.9785	95.2731	22.4138	91.8946	0.546258	0.133177	0.092516	0.861513		954	38
	BIOHIT	R=2 / Pg1=85	58	0.0555024		953	48	34	10		22.7273	95.2048	17.2414	96.5552	0.58966	0.216375	0.179321	0.774214		956	49	31	9		22.5	95.1244	15.5172	96.8592	0.588122	0.21403	0.176244	0.776532		907	45	80	13		13.9785	95.2731	22.4138	91.8946	0.546258	0.133177	0.092516	0.861513		954	38
	BIOHIT	R=2 / Pg1=90	58	0.0555024		953	48	34	10		22.7273	95.2048	17.2414	96.5552	0.58966	0.216375	0.179321	0.774214		956	49	31	9		22.5	95.1244	15.5172	96.8592	0.588122	0.21403	0.176244	0.776532		907	45	80	13		13.9785	95.2731	22.4138	91.8946	0.546258	0.133177	0.092516	0.861513		954	38
	BIOHIT	R=2 / Pg1=95	58	0.0555024		953	48	34	10		22.7273	95.2048	17.2414	96.5552	0.58966	0.216375	0.179321	0.774214		956	49	31	9		22.5	95.1244	15.5172	96.8592	0.588122	0.21403	0.176244	0.776532		907	45	80	13		13.9785	95.2731	22.4138	91.8946	0.546258	0.133177	0.092516	0.861513		954	38
	BIOHIT	R=2 / Pg1=100	58	0.0555024		953	48	34	10		22.7273	95.2048	17.2414	96.5552	0.58966	0.216375	0.179321	0.774214		956	49	31	9		22.5	95.1244	15.5172	96.8592	0.588122	0.21403	0.176244	0.776532		907	45	80	13		13.9785	95.2731	22.4138	91.8946	0.546258	0.133177	0.092516	0.861513		954	38
	BIOHIT	R=2 / Pg1=105	58	0.0555024		953	48	34	10		22.7273	95.2048	17.2414	96.5552	0.58966	0.216375	0.179321	0.774214		956	49	31	9		22.5	95.1244	15.5172	96.8592	0.588122	0.21403	0.176244	0.776532		907	45	80	13		13.9785	95.2731	22.4138	91.8946	0.546258	0.133177	0.092516	0.861513		954	38
	BIOHIT	R=2 / Pg1=110	58	0.0555024		953	48	34	10		22.7273	95.2048	17.2414	96.5552	0.58966	0.216375	0.179321	0.774214		956	49	31	9		22.5	95.1244	15.5172	96.8592	0.588122	0.21403	0.176244	0.776532		907	45	80	13		13.9785	95.2731	22.4138	91.8946	0.546258	0.133177	0.092516	0.861513		954	38
	BIOHIT	R=2 / Pg1=115	58	0.0555024		953	48	34	10		22.7273	95.2048	17.2414	96.5552	0.58966	0.216375	0.179321	0.774214		956	49	31	9		22.5	95.1244	15.5172	96.8592	0.588122	0.21403	0.176244	0.776532		907	45	80	13		13.9785	95.2731	22.4138	91.8946	0.546258	0.133177	0.092516	0.861513		954	38
	BIOHIT	R=2 / Pg1=120	59	0.0564593		952	49	34	10		22.7273	95.1049	16.9492	96.5517	0.589161	0.216147	0.178322	0.774276		955	50	31	9		22.5	95.0249	15.2542	96.856	0.587624	0.213806	0.175249	0.776595		906	46	80	13		13.9785	95.1681	22.0339	91.8864	0.545733	0.133031	0.0914656	0.861571		953	39
	BIOHIT	R=2 / Pg1=125	59	0.0564593		952	49	34	10		22.7273	95.1049	16.9492	96.5517	0.589161	0.216147	0.178322	0.774276		955	50	31	9		22.5	95.0249	15.2542	96.856	0.587624	0.213806	0.175249	0.776595		906	46	80	13		13.9785	95.1681	22.0339	91.8864	0.545733	0.133031	0.0914656	0.861571		953	39
	BIOHIT	R=2 / Pg1=130	59	0.0564593		952	49	34	10		22.7273	95.1049	16.9492	96.5517	0.589161	0.216147	0.178322	0.774276		955	50	31	9		22.5	95.0249	15.2542	96.856	0.587624	0.213806	0.175249	0.776595		906	46	80	13		13.9785	95.1681	22.0339	91.8864	0.545733	0.133031	0.0914656	0.861571		953	39
	BIOHIT	R=2 / Pg1=135	59	0.0564593		952	49	34	10		22.7273	95.1049	16.9492	96.5517	0.589161	0.216147	0.178322	0.774276		955	50	31	9		22.5	95.0249	15.2542	96.856	0.587624	0.213806	0.175249	0.776595		906	46	80	13		13.9785	95.1681	22.0339	91.8864	0.545733	0.133031	0.0914656	0.861571		953	39
	BIOHIT	R=2 / Pg1=140	59	0.0564593		952	49	34	10		22.7273	95.1049	16.9492	96.5517	0.589161	0.216147	0.178322	0.774276		955	50	31	9		22.5	95.0249	15.2542	96.856	0.587624	0.213806	0.175249	0.776595		906	46	80	13		13.9785	95.1681	22.0339	91.8864	0.545733	0.133031	0.0914656	0.861571		953	39
	BIOHIT	R=2 / Pg1=145	59	0.0564593		952	49	34	10		22.7273	95.1049	16.9492	96.5517	0.589161	0.216147	0.178322	0.774276		955	50	31	9		22.5	95.0249	15.2542	96.856	0.587624	0.213806	0.175249	0.776595		906	46	80	13		13.9785	95.1681	22.0339	91.8864	0.545733	0.133031	0.0914656	0.861571		953	39
	BIOHIT	R=2 / Pg1=150	59	0.0564593		952	49	34	10		22.7273	95.1049	16.9492	96.5517	0.589161	0.216147	0.178322	0.774276		955	50	31	9		22.5	95.0249	15.2542	96.856	0.587624	0.213806	0.175249	0.776595		906	46	80	13		13.9785	95.1681	22.0339	91.8864	0.545733	0.133031	0.0914656	0.861571		953	39
	BIOHIT	R=2.5 / Pg1=0	2	0.00191388		1000	1	43	1		2.27273	99.9001	50	95.8773	0.510864	0.0227046	0.0217283	0.977273		1004	1	39	1		2.5	99.9005	50	96.2608	0.512002	0.0249751	0.024005	0.975001		951	1	92	1		1.07527	99.895	50	91.1793	0.504851	0.0107414	0.00970227	0.989248		992	0
	BIOHIT	R=2.5 / Pg1=5	12	0.0114833		995	6	38	6		13.6364	99.4006	50	96.3214	0.565185	0.135546	0.13037	0.863657		998	7	35	5		12.5	99.3035	41.6667	96.6118	0.559017	0.124129	0.118035	0.875028		946	6	87	6		6.45161	99.3697	50	91.5779	0.529107	0.0641095	0.0582136	0.935505		988	4
	BIOHIT	R=2.5 / Pg1=10	30	0.0287081		978	23	37	7		15.9091	97.7023	23.3333	96.3547	0.568057	0.155435	0.136114	0.841223		981	24	34	6		15	97.6119	20	96.6502	0.56306	0.146418	0.126119	0.850335		930	22	85	8		8.60215	97.6891	26.6667	91.6256	0.531456	0.0840336	0.0629123	0.914271		976	16
	BIOHIT	R=2.5 / Pg1=15	41	0.0392344		970	31	34	10		22.7273	96.9031	24.3902	96.6135	0.598152	0.220234	0.196304	0.773348		973	32	31	9		22.5	96.8159	21.9512	96.9124	0.59658	0.217836	0.193159	0.775654		923	29	81	12		12.9032	96.9538	29.2683	91.9323	0.549285	0.125102	0.0985701	0.8715		970	22
	BIOHIT	R=2.5 / Pg1=20	51	0.0488038		960	41	34	10		22.7273	95.9041	19.6078	96.5795	0.593157	0.217964	0.186314	0.773812		963	42	31	9		22.5	95.8209	17.6471	96.8813	0.591604	0.215597	0.183209	0.776126		913	39	81	12		12.9032	95.9034	23.5294	91.8511	0.544033	0.123746	0.0880659	0.871931		961	31
	BIOHIT	R=2.5 / Pg1=25	56	0.0535885		955	46	34	10		22.7273	95.4046	17.8571	96.5622	0.590659	0.216829	0.181319	0.774093		958	47	31	9		22.5	95.3234	16.0714	96.8655	0.589117	0.214478	0.178234	0.77641		908	44	81	12		12.9032	95.3782	21.4286	91.8099	0.541407	0.123069	0.0828138	0.872193		956	36
	BIOHIT	R=2.5 / Pg1=30	61	0.0583732		951	50	33	11		25	95.005	18.0328	96.6463	0.600025	0.237512	0.20005	0.751661		954	51	30	10		25	94.9254	16.3934	96.9512	0.599627	0.237313	0.199254	0.751715		905	47	79	14		15.0538	95.063	22.9508	91.9715	0.550584	0.143106	0.101168	0.850896		952	40
	BIOHIT	R=2.5 / Pg1=35	64	0.061244		948	53	33	11		25	94.7053	17.1875	96.6361	0.598526	0.236763	0.197053	0.751867		951	54	30	10		25	94.6269	15.625	96.9419	0.598134	0.236567	0.196269	0.751922		902	50	79	14		15.0538	94.7479	21.875	91.947	0.549008	0.142631	0.0980166	0.851084		949	43
	BIOHIT	R=2.5 / Pg1=40	68	0.0650718		944	57	33	11		25	94.3057	16.1765	96.6223	0.596528	0.235764	0.193057	0.752159		947	58	30	10		25	94.2289	14.7059	96.9294	0.596144	0.235572	0.192289	0.752217		899	53	78	15		16.129	94.4328	22.0588	92.0164	0.552809	0.152311	0.105618	0.840555		945	47
	BIOHIT	R=2.5 / Pg1=45	71	0.0679426		942	59	32	12		27.2727	94.1059	16.9014	96.7146	0.606893	0.256652	0.213786	0.729657		945	60	29	11		27.5	94.0299	15.493	97.0226	0.607649	0.258582	0.215299	0.727454		897	55	77	16		17.2043	94.2227	22.5352	92.0945	0.557135	0.162104	0.11427	0.82997		943	49
	BIOHIT	R=2.5 / Pg1=50	72	0.0688995		941	60	32	12		27.2727	94.006	16.6667	96.7112	0.606394	0.25638	0.212787	0.729739		944	61	29	11		27.5	93.9303	15.2778	97.0195	0.607152	0.258308	0.214303	0.727536		896	56	77	16		17.2043	94.1176	22.2222	92.0863	0.55661	0.161923	0.113219	0.830044		942	50
	BIOHIT	R=2.5 / Pg1=55	75	0.0717703		938	63	32	12		27.2727	93.7063	16	96.701	0.604895	0.255563	0.20979	0.729991		941	64	29	11		27.5	93.6318	14.6667	97.0103	0.605659	0.257488	0.211318	0.727791		894	58	76	17		18.2796	93.9076	22.6667	92.1649	0.560936	0.171659	0.121871	0.819472		939	53
	BIOHIT	R=2.5 / Pg1=60	76	0.0727273		938	63	31	13		29.5455	93.7063	17.1053	96.8008	0.616259	0.27686	0.232517	0.707351		941	64	28	12		30	93.6318	15.7895	97.1104	0.618159	0.280896	0.236318	0.702891		894	58	75	18		19.3548	93.9076	23.6842	92.2601	0.566312	0.181757	0.132624	0.80875		938	54
	BIOHIT	R=2.5 / Pg1=65	78	0.0746411		937	64	30	14		31.8182	93.6064	17.9487	96.8976	0.627123	0.297839	0.254246	0.684809		940	65	27	13		32.5	93.5323	16.6667	97.2079	0.630162	0.30398	0.260323	0.678091		893	59	74	19		20.4301	93.8025	24.359	92.3475	0.571163	0.19164	0.142326	0.798109		937	55
	BIOHIT	R=2.5 / Pg1=70	78	0.0746411		937	64	30	14		31.8182	93.6064	17.9487	96.8976	0.627123	0.297839	0.254246	0.684809		940	65	27	13		32.5	93.5323	16.6667	97.2079	0.630162	0.30398	0.260323	0.678091		893	59	74	19		20.4301	93.8025	24.359	92.3475	0.571163	0.19164	0.142326	0.798109		937	55
	BIOHIT	R=2.5 / Pg1=75	79	0.0755981		936	65	30	14		31.8182	93.5065	17.7215	96.8944	0.626623	0.297521	0.253247	0.684903		939	66	27	13		32.5	93.4328	16.4557	97.205	0.629664	0.303657	0.259328	0.678187		892	60	74	19		20.4301	93.6975	24.0506	92.3395	0.570638	0.191425	0.141276	0.798191		936	56
	BIOHIT	R=2.5 / Pg1=80	81	0.077512		934	67	30	14		31.8182	93.3067	17.284	96.888	0.625624	0.296885	0.251249	0.685096		937	68	27	13		32.5	93.2338	16.0494	97.1992	0.628669	0.30301	0.257338	0.678383		890	62	74	19		20.4301	93.4874	23.4568	92.3237	0.569588	0.190996	0.139175	0.79836		934	58
	BIOHIT	R=2.5 / Pg1=85	81	0.077512		934	67	30	14		31.8182	93.3067	17.284	96.888	0.625624	0.296885	0.251249	0.685096		937	68	27	13		32.5	93.2338	16.0494	97.1992	0.628669	0.30301	0.257338	0.678383		890	62	74	19		20.4301	93.4874	23.4568	92.3237	0.569588	0.190996	0.139175	0.79836		934	58
	BIOHIT	R=2.5 / Pg1=90	81	0.077512		934	67	30	14		31.8182	93.3067	17.284	96.888	0.625624	0.296885	0.251249	0.685096		937	68	27	13		32.5	93.2338	16.0494	97.1992	0.628669	0.30301	0.257338	0.678383		890	62	74	19		20.4301	93.4874	23.4568	92.3237	0.569588	0.190996	0.139175	0.79836		934	58
	BIOHIT	R=2.5 / Pg1=95	82	0.0784689		933	68	30	14		31.8182	93.2068	17.0732	96.8847	0.625125	0.296567	0.25025	0.685194		936	69	27	13		32.5	93.1343	15.8537	97.1963	0.628172	0.302687	0.256343	0.678483		889	63	74	19		20.4301	93.3824	23.1707	92.3157	0.569062	0.190781	0.138125	0.798446		933	59
	BIOHIT	R=2.5 / Pg1=100	82	0.0784689		933	68	30	14		31.8182	93.2068	17.0732	96.8847	0.625125	0.296567	0.25025	0.685194		936	69	27	13		32.5	93.1343	15.8537	97.1963	0.628172	0.302687	0.256343	0.678483		889	63	74	19		20.4301	93.3824	23.1707	92.3157	0.569062	0.190781	0.138125	0.798446		933	59
	BIOHIT	R=2.5 / Pg1=105	82	0.0784689		933	68	30	14		31.8182	93.2068	17.0732	96.8847	0.625125	0.296567	0.25025	0.685194		936	69	27	13		32.5	93.1343	15.8537	97.1963	0.628172	0.302687	0.256343	0.678483		889	63	74	19		20.4301	93.3824	23.1707	92.3157	0.569062	0.190781	0.138125	0.798446		933	59
	BIOHIT	R=2.5 / Pg1=110	82	0.0784689		933	68	30	14		31.8182	93.2068	17.0732	96.8847	0.625125	0.296567	0.25025	0.685194		936	69	27	13		32.5	93.1343	15.8537	97.1963	0.628172	0.302687	0.256343	0.678483		889	63	74	19		20.4301	93.3824	23.1707	92.3157	0.569062	0.190781	0.138125	0.798446		933	59
	BIOHIT	R=2.5 / Pg1=115	82	0.0784689		933	68	30	14		31.8182	93.2068	17.0732	96.8847	0.625125	0.296567	0.25025	0.685194		936	69	27	13		32.5	93.1343	15.8537	97.1963	0.628172	0.302687	0.256343	0.678483		889	63	74	19		20.4301	93.3824	23.1707	92.3157	0.569062	0.190781	0.138125	0.798446		933	59
	BIOHIT	R=2.5 / Pg1=120	83	0.0794258		932	69	30	14		31.8182	93.1069	16.8675	96.8815	0.624625	0.296249	0.249251	0.685294		935	70	27	13		32.5	93.0348	15.6627	97.1933	0.627674	0.302363	0.255348	0.678584		888	64	74	19		20.4301	93.2773	22.8916	92.3077	0.568537	0.190567	0.137074	0.798534		932	60
	BIOHIT	R=2.5 / Pg1=125	83	0.0794258		932	69	30	14		31.8182	93.1069	16.8675	96.8815	0.624625	0.296249	0.249251	0.685294		935	70	27	13		32.5	93.0348	15.6627	97.1933	0.627674	0.302363	0.255348	0.678584		888	64	74	19		20.4301	93.2773	22.8916	92.3077	0.568537	0.190567	0.137074	0.798534		932	60
	BIOHIT	R=2.5 / Pg1=130	83	0.0794258		932	69	30	14		31.8182	93.1069	16.8675	96.8815	0.624625	0.296249	0.249251	0.685294		935	70	27	13		32.5	93.0348	15.6627	97.1933	0.627674	0.302363	0.255348	0.678584		888	64	74	19		20.4301	93.2773	22.8916	92.3077	0.568537	0.190567	0.137074	0.798534		932	60
	BIOHIT	R=2.5 / Pg1=135	83	0.0794258		932	69	30	14		31.8182	93.1069	16.8675	96.8815	0.624625	0.296249	0.249251	0.685294		935	70	27	13		32.5	93.0348	15.6627	97.1933	0.627674	0.302363	0.255348	0.678584		888	64	74	19		20.4301	93.2773	22.8916	92.3077	0.568537	0.190567	0.137074	0.798534		932	60
	BIOHIT	R=2.5 / Pg1=140	83	0.0794258		932	69	30	14		31.8182	93.1069	16.8675	96.8815	0.624625	0.296249	0.249251	0.685294		935	70	27	13		32.5	93.0348	15.6627	97.1933	0.627674	0.302363	0.255348	0.678584		888	64	74	19		20.4301	93.2773	22.8916	92.3077	0.568537	0.190567	0.137074	0.798534		932	60
	BIOHIT	R=2.5 / Pg1=145	83	0.0794258		932	69	30	14		31.8182	93.1069	16.8675	96.8815	0.624625	0.296249	0.249251	0.685294		935	70	27	13		32.5	93.0348	15.6627	97.1933	0.627674	0.302363	0.255348	0.678584		888	64	74	19		20.4301	93.2773	22.8916	92.3077	0.568537	0.190567	0.137074	0.798534		932	60
	BIOHIT	R=2.5 / Pg1=150	83	0.0794258		932	69	30	14		31.8182	93.1069	16.8675	96.8815	0.624625	0.296249	0.249251	0.685294		935	70	27	13		32.5	93.0348	15.6627	97.1933	0.627674	0.302363	0.255348	0.678584		888	64	74	19		20.4301	93.2773	22.8916	92.3077	0.568537	0.190567	0.137074	0.798534		932	60
	BIOHIT	R=3 / Pg1=0	2	0.00191388		1000	1	43	1		2.27273	99.9001	50	95.8773	0.510864	0.0227046	0.0217283	0.977273		1004	1	39	1		2.5	99.9005	50	96.2608	0.512002	0.0249751	0.024005	0.975001		951	1	92	1		1.07527	99.895	50	91.1793	0.504851	0.0107414	0.00970227	0.989248		992	0
	BIOHIT	R=3 / Pg1=5	12	0.0114833		995	6	38	6		13.6364	99.4006	50	96.3214	0.565185	0.135546	0.13037	0.863657		998	7	35	5		12.5	99.3035	41.6667	96.6118	0.559017	0.124129	0.118035	0.875028		946	6	87	6		6.45161	99.3697	50	91.5779	0.529107	0.0641095	0.0582136	0.935505		988	4
	BIOHIT	R=3 / Pg1=10	30	0.0287081		978	23	37	7		15.9091	97.7023	23.3333	96.3547	0.568057	0.155435	0.136114	0.841223		981	24	34	6		15	97.6119	20	96.6502	0.56306	0.146418	0.126119	0.850335		930	22	85	8		8.60215	97.6891	26.6667	91.6256	0.531456	0.0840336	0.0629123	0.914271		976	16
	BIOHIT	R=3 / Pg1=15	41	0.0392344		970	31	34	10		22.7273	96.9031	24.3902	96.6135	0.598152	0.220234	0.196304	0.773348		973	32	31	9		22.5	96.8159	21.9512	96.9124	0.59658	0.217836	0.193159	0.775654		923	29	81	12		12.9032	96.9538	29.2683	91.9323	0.549285	0.125102	0.0985701	0.8715		970	22
	BIOHIT	R=3 / Pg1=20	52	0.0497608		959	42	34	10		22.7273	95.8042	19.2308	96.576	0.592657	0.217737	0.185315	0.773866		962	43	31	9		22.5	95.7214	17.3077	96.8781	0.591107	0.215373	0.182214	0.77618		912	40	81	12		12.9032	95.7983	23.0769	91.8429	0.543508	0.123611	0.0870155	0.871981		960	32
	BIOHIT	R=3 / Pg1=25	57	0.0545455		954	47	34	10		22.7273	95.3047	17.5439	96.5587	0.59016	0.216602	0.18032	0.774152		957	48	31	9		22.5	95.2239	15.7895	96.8623	0.588619	0.214254	0.177239	0.77647		907	45	81	12		12.9032	95.2731	21.0526	91.8016	0.540882	0.122933	0.0817634	0.872249		955	37
	BIOHIT	R=3 / Pg1=30	63	0.0602871		949	52	33	11		25	94.8052	17.4603	96.6395	0.599026	0.237013	0.198052	0.751797		952	53	30	10		25	94.7264	15.873	96.945	0.598632	0.236816	0.197264	0.751852		903	49	79	14		15.0538	94.8529	22.2222	91.9552	0.549534	0.142789	0.099067	0.85102		950	42
	BIOHIT	R=3 / Pg1=35	68	0.0650718		944	57	33	11		25	94.3057	16.1765	96.6223	0.596528	0.235764	0.193057	0.752159		947	58	30	10		25	94.2289	14.7059	96.9294	0.596144	0.235572	0.192289	0.752217		898	54	79	14		15.0538	94.3277	20.5882	91.914	0.546907	0.141999	0.0938149	0.851354		945	47
	BIOHIT	R=3 / Pg1=40	73	0.0698565		939	62	33	11		25	93.8062	15.0685	96.6049	0.594031	0.234515	0.188062	0.752553		942	63	30	10		25	93.7313	13.6986	96.9136	0.593657	0.234328	0.187313	0.752615		894	58	78	15		16.129	93.9076	20.5479	91.9753	0.550183	0.151464	0.100366	0.84092		940	52
	BIOHIT	R=3 / Pg1=45	78	0.0746411		936	65	31	13		29.5455	93.5065	16.6667	96.7942	0.61526	0.276269	0.230519	0.707532		939	66	28	12		30	93.4328	15.3846	97.1044	0.617164	0.280299	0.234328	0.703074		891	61	76	17		18.2796	93.5924	21.7949	92.1406	0.55936	0.171083	0.11872	0.819712		937	55
	BIOHIT	R=3 / Pg1=50	80	0.076555		935	66	30	14		31.8182	93.4066	17.5	96.8912	0.626124	0.297203	0.252248	0.684999		938	67	27	13		32.5	93.3333	16.25	97.2021	0.629167	0.303333	0.258333	0.678284		890	62	75	18		19.3548	93.4874	22.5	92.228	0.564211	0.180943	0.128422	0.809077		936	56
	BIOHIT	R=3 / Pg1=55	84	0.0803828		931	70	30	14		31.8182	93.007	16.6667	96.8783	0.624126	0.295931	0.248252	0.685395		934	71	27	13		32.5	92.9353	15.4762	97.1904	0.627177	0.30204	0.254353	0.678687		887	65	74	19		20.4301	93.1723	22.619	92.2997	0.568012	0.190352	0.136024	0.798623		932	60
	BIOHIT	R=3 / Pg1=60	86	0.0822967		930	71	29	15		34.0909	92.9071	17.4419	96.976	0.63499	0.316729	0.26998	0.662896		933	72	26	14		35	92.8358	16.2791	97.2888	0.639179	0.324925	0.278358	0.653936		887	65	72	21		22.5806	93.1723	24.4186	92.4922	0.578765	0.210389	0.157529	0.777198		930	62
	BIOHIT	R=3 / Pg1=65	90	0.0861244		927	74	28	16		36.3636	92.6074	17.7778	97.0681	0.644855	0.336754	0.28971	0.640643		930	75	25	15		37.5	92.5373	16.6667	97.3822	0.650187	0.347015	0.300373	0.62944		884	68	71	22		23.6559	92.8571	24.4444	92.5654	0.582565	0.219662	0.165131	0.766775		927	65
	BIOHIT	R=3 / Pg1=70	90	0.0861244		927	74	28	16		36.3636	92.6074	17.7778	97.0681	0.644855	0.336754	0.28971	0.640643		930	75	25	15		37.5	92.5373	16.6667	97.3822	0.650187	0.347015	0.300373	0.62944		884	68	71	22		23.6559	92.8571	24.4444	92.5654	0.582565	0.219662	0.165131	0.766775		927	65
	BIOHIT	R=3 / Pg1=75	92	0.0880383		925	76	28	16		36.3636	92.4076	17.3913	97.0619	0.643856	0.336028	0.287712	0.640877		928	77	25	15		37.5	92.3383	16.3043	97.3767	0.649192	0.346269	0.298383	0.629679		882	70	71	22		23.6559	92.6471	23.913	92.5498	0.581515	0.219165	0.16303	0.766974		925	67
	BIOHIT	R=3 / Pg1=80	94	0.0899522		923	78	28	16		36.3636	92.2078	17.0213	97.0557	0.642857	0.335301	0.285714	0.641117		926	79	25	15		37.5	92.1393	15.9574	97.3712	0.648197	0.345522	0.296393	0.629924		880	72	71	22		23.6559	92.437	23.4043	92.5342	0.580464	0.218668	0.160929	0.767178		923	69
	BIOHIT	R=3 / Pg1=85	96	0.091866		921	80	28	16		36.3636	92.008	16.6667	97.0495	0.641858	0.334575	0.283716	0.641363		924	81	25	15		37.5	91.9403	15.625	97.3656	0.647201	0.344776	0.294403	0.630175		878	74	71	22		23.6559	92.2269	22.9167	92.5184	0.579414	0.218171	0.158828	0.767388		921	71
	BIOHIT	R=3 / Pg1=90	96	0.091866		921	80	28	16		36.3636	92.008	16.6667	97.0495	0.641858	0.334575	0.283716	0.641363		924	81	25	15		37.5	91.9403	15.625	97.3656	0.647201	0.344776	0.294403	0.630175		878	74	71	22		23.6559	92.2269	22.9167	92.5184	0.579414	0.218171	0.158828	0.767388		921	71
	BIOHIT	R=3 / Pg1=95	97	0.092823		920	81	28	16		36.3636	91.9081	16.4948	97.0464	0.641359	0.334211	0.282717	0.641488		923	82	25	15		37.5	91.8408	15.4639	97.3629	0.646704	0.344403	0.293408	0.630303		877	75	71	22		23.6559	92.1218	22.6804	92.5105	0.578889	0.217923	0.157778	0.767495		920	72
	BIOHIT	R=3 / Pg1=100	97	0.092823		920	81	28	16		36.3636	91.9081	16.4948	97.0464	0.641359	0.334211	0.282717	0.641488		923	82	25	15		37.5	91.8408	15.4639	97.3629	0.646704	0.344403	0.293408	0.630303		877	75	71	22		23.6559	92.1218	22.6804	92.5105	0.578889	0.217923	0.157778	0.767495		920	72
	BIOHIT	R=3 / Pg1=105	98	0.0937799		919	82	28	16		36.3636	91.8082	16.3265	97.0433	0.640859	0.333848	0.281718	0.641615		922	83	25	15		37.5	91.7413	15.3061	97.3601	0.646206	0.34403	0.292413	0.630433		876	76	71	22		23.6559	92.0168	22.449	92.5026	0.578364	0.217674	0.156727	0.767603		919	73
	BIOHIT	R=3 / Pg1=110	98	0.0937799		919	82	28	16		36.3636	91.8082	16.3265	97.0433	0.640859	0.333848	0.281718	0.641615		922	83	25	15		37.5	91.7413	15.3061	97.3601	0.646206	0.34403	0.292413	0.630433		876	76	71	22		23.6559	92.0168	22.449	92.5026	0.578364	0.217674	0.156727	0.767603		919	73
	BIOHIT	R=3 / Pg1=115	98	0.0937799		919	82	28	16		36.3636	91.8082	16.3265	97.0433	0.640859	0.333848	0.281718	0.641615		922	83	25	15		37.5	91.7413	15.3061	97.3601	0.646206	0.34403	0.292413	0.630433		876	76	71	22		23.6559	92.0168	22.449	92.5026	0.578364	0.217674	0.156727	0.767603		919	73
	BIOHIT	R=3 / Pg1=120	99	0.0947368		918	83	28	16		36.3636	91.7083	16.1616	97.0402	0.64036	0.333485	0.280719	0.641743		921	84	25	15		37.5	91.6418	15.1515	97.3573	0.645709	0.343657	0.291418	0.630564		875	77	71	22		23.6559	91.9118	22.2222	92.4947	0.577838	0.217426	0.155677	0.767713		918	74
	BIOHIT	R=3 / Pg1=125	99	0.0947368		918	83	28	16		36.3636	91.7083	16.1616	97.0402	0.64036	0.333485	0.280719	0.641743		921	84	25	15		37.5	91.6418	15.1515	97.3573	0.645709	0.343657	0.291418	0.630564		875	77	71	22		23.6559	91.9118	22.2222	92.4947	0.577838	0.217426	0.155677	0.767713		918	74
	BIOHIT	R=3 / Pg1=130	99	0.0947368		918	83	28	16		36.3636	91.7083	16.1616	97.0402	0.64036	0.333485	0.280719	0.641743		921	84	25	15		37.5	91.6418	15.1515	97.3573	0.645709	0.343657	0.291418	0.630564		875	77	71	22		23.6559	91.9118	22.2222	92.4947	0.577838	0.217426	0.155677	0.767713		918	74
	BIOHIT	R=3 / Pg1=135	99	0.0947368		918	83	28	16		36.3636	91.7083	16.1616	97.0402	0.64036	0.333485	0.280719	0.641743		921	84	25	15		37.5	91.6418	15.1515	97.3573	0.645709	0.343657	0.291418	0.630564		875	77	71	22		23.6559	91.9118	22.2222	92.4947	0.577838	0.217426	0.155677	0.767713		918	74
	BIOHIT	R=3 / Pg1=140	99	0.0947368		918	83	28	16		36.3636	91.7083	16.1616	97.0402	0.64036	0.333485	0.280719	0.641743		921	84	25	15		37.5	91.6418	15.1515	97.3573	0.645709	0.343657	0.291418	0.630564		875	77	71	22		23.6559	91.9118	22.2222	92.4947	0.577838	0.217426	0.155677	0.767713		918	74
	BIOHIT	R=3 / Pg1=145	99	0.0947368		918	83	28	16		36.3636	91.7083	16.1616	97.0402	0.64036	0.333485	0.280719	0.641743		921	84	25	15		37.5	91.6418	15.1515	97.3573	0.645709	0.343657	0.291418	0.630564		875	77	71	22		23.6559	91.9118	22.2222	92.4947	0.577838	0.217426	0.155677	0.767713		918	74
	BIOHIT	R=3 / Pg1=150	99	0.0947368		918	83	28	16		36.3636	91.7083	16.1616	97.0402	0.64036	0.333485	0.280719	0.641743		921	84	25	15		37.5	91.6418	15.1515	97.3573	0.645709	0.343657	0.291418	0.630564		875	77	71	22		23.6559	91.9118	22.2222	92.4947	0.577838	0.217426	0.155677	0.767713		918	74
	BIOHIT	R=3.5 / Pg1=0	2	0.00191388		1000	1	43	1		2.27273	99.9001	50	95.8773	0.510864	0.0227046	0.0217283	0.977273		1004	1	39	1		2.5	99.9005	50	96.2608	0.512002	0.0249751	0.024005	0.975001		951	1	92	1		1.07527	99.895	50	91.1793	0.504851	0.0107414	0.00970227	0.989248		992	0
	BIOHIT	R=3.5 / Pg1=5	12	0.0114833		995	6	38	6		13.6364	99.4006	50	96.3214	0.565185	0.135546	0.13037	0.863657		998	7	35	5		12.5	99.3035	41.6667	96.6118	0.559017	0.124129	0.118035	0.875028		946	6	87	6		6.45161	99.3697	50	91.5779	0.529107	0.0641095	0.0582136	0.935505		988	4
	BIOHIT	R=3.5 / Pg1=10	30	0.0287081		978	23	37	7		15.9091	97.7023	23.3333	96.3547	0.568057	0.155435	0.136114	0.841223		981	24	34	6		15	97.6119	20	96.6502	0.56306	0.146418	0.126119	0.850335		930	22	85	8		8.60215	97.6891	26.6667	91.6256	0.531456	0.0840336	0.0629123	0.914271		976	16
	BIOHIT	R=3.5 / Pg1=15	41	0.0392344		970	31	34	10		22.7273	96.9031	24.3902	96.6135	0.598152	0.220234	0.196304	0.773348		973	32	31	9		22.5	96.8159	21.9512	96.9124	0.59658	0.217836	0.193159	0.775654		923	29	81	12		12.9032	96.9538	29.2683	91.9323	0.549285	0.125102	0.0985701	0.8715		970	22
	BIOHIT	R=3.5 / Pg1=20	52	0.0497608		959	42	34	10		22.7273	95.8042	19.2308	96.576	0.592657	0.217737	0.185315	0.773866		962	43	31	9		22.5	95.7214	17.3077	96.8781	0.591107	0.215373	0.182214	0.77618		912	40	81	12		12.9032	95.7983	23.0769	91.8429	0.543508	0.123611	0.0870155	0.871981		960	32
	BIOHIT	R=3.5 / Pg1=25	58	0.0555024		954	47	33	11		25	95.3047	18.9655	96.6565	0.601523	0.238262	0.203047	0.751468		957	48	30	10		25	95.2239	17.2414	96.9605	0.601119	0.23806	0.202239	0.751519		907	45	80	13		13.9785	95.2731	22.4138	91.8946	0.546258	0.133177	0.092516	0.861513		955	37
	BIOHIT	R=3.5 / Pg1=30	66	0.0631579		947	54	32	12		27.2727	94.6054	18.1818	96.7314	0.609391	0.258015	0.218781	0.729271		950	55	29	11		27.5	94.5274	16.6667	97.0378	0.610137	0.25995	0.220274	0.727063		902	50	77	16		17.2043	94.7479	24.2424	92.1348	0.559761	0.163007	0.119522	0.829621		948	44
	BIOHIT	R=3.5 / Pg1=35	71	0.0679426		942	59	32	12		27.2727	94.1059	16.9014	96.7146	0.606893	0.256652	0.213786	0.729657		945	60	29	11		27.5	94.0299	15.493	97.0226	0.607649	0.258582	0.215299	0.727454		897	55	77	16		17.2043	94.2227	22.5352	92.0945	0.557135	0.162104	0.11427	0.82997		943	49
	BIOHIT	R=3.5 / Pg1=40	78	0.0746411		935	66	32	12		27.2727	93.4066	15.3846	96.6908	0.603397	0.254745	0.206793	0.730255		938	67	29	11		27.5	93.3333	14.1026	97.001	0.604167	0.256667	0.208333	0.728059		891	61	76	17		18.2796	93.5924	21.7949	92.1406	0.55936	0.171083	0.11872	0.819712		936	56
	BIOHIT	R=3.5 / Pg1=45	84	0.0803828		931	70	30	14		31.8182	93.007	16.6667	96.8783	0.624126	0.295931	0.248252	0.685395		934	71	27	13		32.5	92.9353	15.4762	97.1904	0.627177	0.30204	0.254353	0.678687		888	64	73	20		21.5054	93.2773	23.8095	92.4037	0.573913	0.200596	0.147827	0.78782		932	60
	BIOHIT	R=3.5 / Pg1=50	86	0.0822967		930	71	29	15		34.0909	92.9071	17.4419	96.976	0.63499	0.316729	0.26998	0.662896		933	72	26	14		35	92.8358	16.2791	97.2888	0.639179	0.324925	0.278358	0.653936		887	65	72	21		22.5806	93.1723	24.4186	92.4922	0.578765	0.210389	0.157529	0.777198		931	61
	BIOHIT	R=3.5 / Pg1=55	90	0.0861244		926	75	29	15		34.0909	92.5075	16.6667	96.9634	0.632992	0.315366	0.265984	0.663336		929	76	26	14		35	92.4378	15.5556	97.2775	0.637189	0.323532	0.274378	0.654384		884	68	71	22		23.6559	92.8571	24.4444	92.5654	0.582565	0.219662	0.165131	0.766775		927	65
	BIOHIT	R=3.5 / Pg1=60	92	0.0880383		925	76	28	16		36.3636	92.4076	17.3913	97.0619	0.643856	0.336028	0.287712	0.640877		928	77	25	15		37.5	92.3383	16.3043	97.3767	0.649192	0.346269	0.298383	0.629679		884	68	69	24		25.8065	92.8571	26.087	92.7597	0.593318	0.239631	0.186636	0.745366		925	67
	BIOHIT	R=3.5 / Pg1=65	97	0.092823		922	79	26	18		40.9091	92.1079	18.5567	97.2574	0.665085	0.376805	0.33017	0.596156		925	80	23	17		42.5	92.0398	17.5258	97.5738	0.672699	0.391169	0.345398	0.580484		881	71	67	26		27.957	92.542	26.8041	92.9325	0.602495	0.25872	0.20499	0.72428		922	70
	BIOHIT	R=3.5 / Pg1=70	97	0.092823		922	79	26	18		40.9091	92.1079	18.5567	97.2574	0.665085	0.376805	0.33017	0.596156		925	80	23	17		42.5	92.0398	17.5258	97.5738	0.672699	0.391169	0.345398	0.580484		881	71	67	26		27.957	92.542	26.8041	92.9325	0.602495	0.25872	0.20499	0.72428		922	70
	BIOHIT	R=3.5 / Pg1=75	100	0.0956938		919	82	26	18		40.9091	91.8082	18	97.2487	0.663586	0.375579	0.327173	0.59656		922	83	23	17		42.5	91.7413	17	97.5661	0.671206	0.3899	0.342413	0.580901		878	74	67	26		27.957	92.2269	26	92.9101	0.600919	0.257839	0.201839	0.724611		919	73
	BIOHIT	R=3.5 / Pg1=80	105	0.100478		914	87	26	18		40.9091	91.3087	17.1429	97.234	0.661089	0.373536	0.322178	0.597267		917	88	23	17		42.5	91.2438	16.1905	97.5532	0.668719	0.387786	0.337438	0.581629		873	79	67	26		27.957	91.7017	24.7619	92.8723	0.598293	0.25637	0.196587	0.725194		914	78
	BIOHIT	R=3.5 / Pg1=85	107	0.102392		912	89	26	18		40.9091	91.1089	16.8224	97.2281	0.66009	0.372718	0.32018	0.597561		915	90	23	17		42.5	91.0448	15.8879	97.548	0.667724	0.38694	0.335448	0.581932		871	81	67	26		27.957	91.4916	24.2991	92.8571	0.597243	0.255783	0.194486	0.725437		912	80
	BIOHIT	R=3.5 / Pg1=90	108	0.103349		911	90	26	18		40.9091	91.009	16.6667	97.2252	0.65959	0.37231	0.319181	0.59771		914	91	23	17		42.5	90.9453	15.7407	97.5454	0.667226	0.386517	0.334453	0.582086		870	82	67	26		27.957	91.3866	24.0741	92.8495	0.596718	0.255489	0.193435	0.725561		911	81
	BIOHIT	R=3.5 / Pg1=95	109	0.104306		910	91	26	18		40.9091	90.9091	16.5138	97.2222	0.659091	0.371901	0.318182	0.597861		913	92	23	17		42.5	90.8458	15.5963	97.5427	0.666729	0.386095	0.333458	0.582241		869	83	67	26		27.957	91.2815	23.8532	92.8419	0.596193	0.255196	0.192385	0.725686		910	82
	BIOHIT	R=3.5 / Pg1=100	109	0.104306		910	91	26	18		40.9091	90.9091	16.5138	97.2222	0.659091	0.371901	0.318182	0.597861		913	92	23	17		42.5	90.8458	15.5963	97.5427	0.666729	0.386095	0.333458	0.582241		869	83	67	26		27.957	91.2815	23.8532	92.8419	0.596193	0.255196	0.192385	0.725686		910	82
	BIOHIT	R=3.5 / Pg1=105	110	0.105263		909	92	26	18		40.9091	90.8092	16.3636	97.2193	0.658591	0.371492	0.317183	0.598014		912	93	23	17		42.5	90.7463	15.4545	97.5401	0.666231	0.385672	0.332463	0.582399		868	84	67	26		27.957	91.1765	23.6364	92.8342	0.595667	0.254902	0.191335	0.725813		909	83
	BIOHIT	R=3.5 / Pg1=110	111	0.10622		908	93	26	18		40.9091	90.7093	16.2162	97.2163	0.658092	0.371083	0.316184	0.598168		911	94	23	17		42.5	90.6468	15.3153	97.5375	0.665734	0.385249	0.331468	0.582558		867	85	67	26		27.957	91.0714	23.4234	92.8266	0.595142	0.254608	0.190284	0.725942		908	84
	BIOHIT	R=3.5 / Pg1=115	111	0.10622		908	93	26	18		40.9091	90.7093	16.2162	97.2163	0.658092	0.371083	0.316184	0.598168		911	94	23	17		42.5	90.6468	15.3153	97.5375	0.665734	0.385249	0.331468	0.582558		867	85	67	26		27.957	91.0714	23.4234	92.8266	0.595142	0.254608	0.190284	0.725942		908	84
	BIOHIT	R=3.5 / Pg1=120	112	0.107177		907	94	26	18		40.9091	90.6094	16.0714	97.2133	0.657592	0.370675	0.315185	0.598324		910	95	23	17		42.5	90.5473	15.1786	97.5348	0.665236	0.384826	0.330473	0.582718		866	86	67	26		27.957	90.9664	23.2143	92.8189	0.594617	0.254315	0.189234	0.726072		907	85
	BIOHIT	R=3.5 / Pg1=125	112	0.107177		907	94	26	18		40.9091	90.6094	16.0714	97.2133	0.657592	0.370675	0.315185	0.598324		910	95	23	17		42.5	90.5473	15.1786	97.5348	0.665236	0.384826	0.330473	0.582718		866	86	67	26		27.957	90.9664	23.2143	92.8189	0.594617	0.254315	0.189234	0.726072		907	85
	BIOHIT	R=3.5 / Pg1=130	112	0.107177		907	94	26	18		40.9091	90.6094	16.0714	97.2133	0.657592	0.370675	0.315185	0.598324		910	95	23	17		42.5	90.5473	15.1786	97.5348	0.665236	0.384826	0.330473	0.582718		866	86	67	26		27.957	90.9664	23.2143	92.8189	0.594617	0.254315	0.189234	0.726072		907	85
	BIOHIT	R=3.5 / Pg1=135	113	0.108134		907	94	25	19		43.1818	90.6094	16.8142	97.3176	0.668956	0.391268	0.337912	0.57589		910	95	22	18		45	90.5473	15.9292	97.6395	0.677736	0.407463	0.355473	0.558064		866	86	66	27		29.0323	90.9664	23.8938	92.9185	0.599993	0.264096	0.199986	0.715404		907	85
	BIOHIT	R=3.5 / Pg1=140	113	0.108134		907	94	25	19		43.1818	90.6094	16.8142	97.3176	0.668956	0.391268	0.337912	0.57589		910	95	22	18		45	90.5473	15.9292	97.6395	0.677736	0.407463	0.355473	0.558064		866	86	66	27		29.0323	90.9664	23.8938	92.9185	0.599993	0.264096	0.199986	0.715404		907	85
	BIOHIT	R=3.5 / Pg1=145	113	0.108134		907	94	25	19		43.1818	90.6094	16.8142	97.3176	0.668956	0.391268	0.337912	0.57589		910	95	22	18		45	90.5473	15.9292	97.6395	0.677736	0.407463	0.355473	0.558064		866	86	66	27		29.0323	90.9664	23.8938	92.9185	0.599993	0.264096	0.199986	0.715404		907	85
	BIOHIT	R=3.5 / Pg1=150	113	0.108134		907	94	25	19		43.1818	90.6094	16.8142	97.3176	0.668956	0.391268	0.337912	0.57589		910	95	22	18		45	90.5473	15.9292	97.6395	0.677736	0.407463	0.355473	0.558064		866	86	66	27		29.0323	90.9664	23.8938	92.9185	0.599993	0.264096	0.199986	0.715404		907	85
	BIOHIT	R=4 / Pg1=0	2	0.00191388		1000	1	43	1		2.27273	99.9001	50	95.8773	0.510864	0.0227046	0.0217283	0.977273		1004	1	39	1		2.5	99.9005	50	96.2608	0.512002	0.0249751	0.024005	0.975001		951	1	92	1		1.07527	99.895	50	91.1793	0.504851	0.0107414	0.00970227	0.989248		992	0
	BIOHIT	R=4 / Pg1=5	12	0.0114833		995	6	38	6		13.6364	99.4006	50	96.3214	0.565185	0.135546	0.13037	0.863657		998	7	35	5		12.5	99.3035	41.6667	96.6118	0.559017	0.124129	0.118035	0.875028		946	6	87	6		6.45161	99.3697	50	91.5779	0.529107	0.0641095	0.0582136	0.935505		988	4
	BIOHIT	R=4 / Pg1=10	30	0.0287081		978	23	37	7		15.9091	97.7023	23.3333	96.3547	0.568057	0.155435	0.136114	0.841223		981	24	34	6		15	97.6119	20	96.6502	0.56306	0.146418	0.126119	0.850335		930	22	85	8		8.60215	97.6891	26.6667	91.6256	0.531456	0.0840336	0.0629123	0.914271		976	16
	BIOHIT	R=4 / Pg1=15	41	0.0392344		970	31	34	10		22.7273	96.9031	24.3902	96.6135	0.598152	0.220234	0.196304	0.773348		973	32	31	9		22.5	96.8159	21.9512	96.9124	0.59658	0.217836	0.193159	0.775654		923	29	81	12		12.9032	96.9538	29.2683	91.9323	0.549285	0.125102	0.0985701	0.8715		970	22
	BIOHIT	R=4 / Pg1=20	53	0.0507177		959	42	33	11		25	95.8042	20.7547	96.6734	0.604021	0.23951	0.208042	0.751173		962	43	30	10		25	95.7214	18.8679	96.9758	0.603607	0.239303	0.207214	0.751219		912	40	80	13		13.9785	95.7983	24.5283	91.9355	0.548884	0.133912	0.0977681	0.861241		960	32
	BIOHIT	R=4 / Pg1=25	59	0.0564593		954	47	32	12		27.2727	95.3047	20.339	96.7546	0.612887	0.259922	0.225774	0.728787		957	48	29	11		27.5	95.2239	18.6441	97.0588	0.613619	0.261866	0.227239	0.726571		907	45	79	14		15.0538	95.2731	23.7288	91.9878	0.551634	0.143422	0.103269	0.850777		955	37
	BIOHIT	R=4 / Pg1=30	67	0.0641148		947	54	31	13		29.5455	94.6054	19.403	96.8303	0.620754	0.279516	0.241508	0.706608		950	55	28	12		30	94.5274	17.9104	97.137	0.622637	0.283582	0.245274	0.702136		902	50	76	17		18.2796	94.7479	25.3731	92.229	0.565137	0.173195	0.130275	0.81889		948	44
	BIOHIT	R=4 / Pg1=35	75	0.0717703		940	61	30	14		31.8182	93.9061	18.6667	96.9072	0.628621	0.298792	0.257243	0.684536		943	62	27	13		32.5	93.8308	17.3333	97.2165	0.631654	0.30495	0.263308	0.677813		895	57	75	18		19.3548	94.0126	24	92.268	0.566837	0.18196	0.133674	0.808671		941	51
	BIOHIT	R=4 / Pg1=40	83	0.0794258		932	69	30	14		31.8182	93.1069	16.8675	96.8815	0.624625	0.296249	0.249251	0.685294		935	70	27	13		32.5	93.0348	15.6627	97.1933	0.627674	0.302363	0.255348	0.678584		888	64	74	19		20.4301	93.2773	22.8916	92.3077	0.568537	0.190567	0.137074	0.798534		933	59
	BIOHIT	R=4 / Pg1=45	90	0.0861244		927	74	28	16		36.3636	92.6074	17.7778	97.0681	0.644855	0.336754	0.28971	0.640643		930	75	25	15		37.5	92.5373	16.6667	97.3822	0.650187	0.347015	0.300373	0.62944		884	68	71	22		23.6559	92.8571	24.4444	92.5654	0.582565	0.219662	0.165131	0.766775		928	64
	BIOHIT	R=4 / Pg1=50	93	0.0889952		925	76	27	17		38.6364	92.4076	18.2796	97.1639	0.65522	0.357029	0.31044	0.618315		928	77	24	16		40	92.3383	17.2043	97.479	0.661692	0.369353	0.323383	0.604872		882	70	70	23		24.7312	92.6471	24.7312	92.6471	0.586891	0.229127	0.173782	0.756271		926	66
	BIOHIT	R=4 / Pg1=55	97	0.092823		921	80	27	17		38.6364	92.008	17.5258	97.1519	0.653222	0.355485	0.306444	0.618819		924	81	24	16		40	91.9403	16.4948	97.4684	0.659701	0.367761	0.319403	0.605389		879	73	69	24		25.8065	92.3319	24.7423	92.7215	0.590692	0.238276	0.181384	0.745888		922	70
	BIOHIT	R=4 / Pg1=60	105	0.100478		914	87	26	18		40.9091	91.3087	17.1429	97.234	0.661089	0.373536	0.322178	0.597267		917	88	23	17		42.5	91.2438	16.1905	97.5532	0.668719	0.387786	0.337438	0.581629		875	77	65	28		30.1075	91.9118	26.6667	93.0851	0.610096	0.276724	0.220193	0.703589		915	77
	BIOHIT	R=4 / Pg1=65	111	0.10622		910	91	24	20		45.4545	90.9091	18.018	97.4304	0.681818	0.413223	0.363636	0.552978		913	92	21	19		47.5	90.8458	17.1171	97.7516	0.691729	0.431517	0.383458	0.532921		871	81	63	30		32.2581	91.4916	27.027	93.2548	0.618748	0.295134	0.237497	0.682742		911	81
	BIOHIT	R=4 / Pg1=70	112	0.107177		909	92	24	20		45.4545	90.8092	17.8571	97.4277	0.681319	0.412769	0.362637	0.553144		912	93	21	19		47.5	90.7463	16.9643	97.7492	0.691231	0.431045	0.382463	0.533093		870	82	63	30		32.2581	91.3866	26.7857	93.2476	0.618223	0.294795	0.236446	0.682873		910	82
	BIOHIT	R=4 / Pg1=75	115	0.110048		906	95	24	20		45.4545	90.5095	17.3913	97.4194	0.67982	0.411407	0.35964	0.553649		909	96	21	19		47.5	90.4478	16.5217	97.7419	0.689739	0.429627	0.379478	0.533619		867	85	63	30		32.2581	91.0714	26.087	93.2258	0.616647	0.293779	0.233295	0.683278		907	85
	BIOHIT	R=4 / Pg1=80	123	0.117703		899	102	23	21		47.7273	89.8102	17.0732	97.5054	0.687687	0.42864	0.375375	0.532566		901	104	21	19		47.5	89.6517	15.4472	97.7223	0.685759	0.425846	0.371517	0.535102		860	92	62	31		33.3333	90.3361	25.2033	93.2755	0.618347	0.30112	0.236695	0.673635		900	92
	BIOHIT	R=4 / Pg1=85	125	0.119617		897	104	23	21		47.7273	89.6104	16.8	97.5	0.686688	0.427686	0.373377	0.532952		899	106	21	19		47.5	89.4527	15.2	97.7174	0.684764	0.4249	0.369527	0.53549		858	94	62	31		33.3333	90.1261	24.8	93.2609	0.617297	0.30042	0.234594	0.673939		898	94
	BIOHIT	R=4 / Pg1=90	129	0.123445		893	108	23	21		47.7273	89.2108	16.2791	97.4891	0.68469	0.425779	0.369381	0.533746		895	110	21	19		47.5	89.0547	14.7287	97.7074	0.682774	0.42301	0.365547	0.536288		854	98	62	31		33.3333	89.7059	24.031	93.2314	0.615196	0.29902	0.230392	0.674568		894	98
	BIOHIT	R=4 / Pg1=95	132	0.126316		890	111	23	21		47.7273	88.9111	15.9091	97.4808	0.683192	0.424348	0.366384	0.53436		892	113	21	19		47.5	88.7562	14.3939	97.6999	0.681281	0.421592	0.362562	0.536905		851	101	62	31		33.3333	89.3908	23.4848	93.2092	0.61362	0.297969	0.227241	0.675056		891	101
	BIOHIT	R=4 / Pg1=100	134	0.12823		888	113	23	21		47.7273	88.7113	15.6716	97.4753	0.682193	0.423395	0.364386	0.534778		890	115	21	19		47.5	88.5572	14.1791	97.6948	0.680286	0.420647	0.360572	0.537326		850	102	61	32		34.4086	89.2857	23.8806	93.3041	0.618472	0.30722	0.236943	0.664607		889	103
	BIOHIT	R=4 / Pg1=105	136	0.130144		886	115	23	21		47.7273	88.5115	15.4412	97.4697	0.681194	0.422441	0.362388	0.535203		888	117	21	19		47.5	88.3582	13.9706	97.6898	0.679291	0.419701	0.358582	0.537753		848	104	61	32		34.4086	89.0756	23.5294	93.2893	0.617421	0.306497	0.234842	0.664949		887	105
	BIOHIT	R=4 / Pg1=110	139	0.133014		883	118	23	21		47.7273	88.2118	15.1079	97.4614	0.679695	0.421011	0.359391	0.535854		885	120	21	19		47.5	88.0597	13.6691	97.6821	0.677799	0.418284	0.355597	0.538407		845	107	61	32		34.4086	88.7605	23.0216	93.2671	0.615846	0.305412	0.231691	0.665474		884	108
	BIOHIT	R=4 / Pg1=115	140	0.133971		882	119	23	21		47.7273	88.1119	15	97.4586	0.679196	0.420534	0.358392	0.536075		884	121	21	19		47.5	87.9602	13.5714	97.6796	0.677301	0.417811	0.354602	0.538629		844	108	61	32		34.4086	88.6555	22.8571	93.2597	0.61532	0.305051	0.230641	0.665652		883	109
	BIOHIT	R=4 / Pg1=120	141	0.134928		881	120	23	21		47.7273	88.012	14.8936	97.4558	0.678696	0.420057	0.357393	0.536298		883	122	21	19		47.5	87.8607	13.4752	97.677	0.676803	0.417338	0.353607	0.538852		843	109	61	32		34.4086	88.5504	22.695	93.2522	0.614795	0.30469	0.22959	0.665832		882	110
	BIOHIT	R=4 / Pg1=125	141	0.134928		881	120	23	21		47.7273	88.012	14.8936	97.4558	0.678696	0.420057	0.357393	0.536298		883	122	21	19		47.5	87.8607	13.4752	97.677	0.676803	0.417338	0.353607	0.538852		843	109	61	32		34.4086	88.5504	22.695	93.2522	0.614795	0.30469	0.22959	0.665832		882	110
	BIOHIT	R=4 / Pg1=130	141	0.134928		881	120	23	21		47.7273	88.012	14.8936	97.4558	0.678696	0.420057	0.357393	0.536298		883	122	21	19		47.5	87.8607	13.4752	97.677	0.676803	0.417338	0.353607	0.538852		843	109	61	32		34.4086	88.5504	22.695	93.2522	0.614795	0.30469	0.22959	0.665832		882	110
	BIOHIT	R=4 / Pg1=135	142	0.135885		881	120	22	22		50	88.012	15.493	97.5637	0.69006	0.44006	0.38012	0.51417		883	122	20	20		50	87.8607	14.0845	97.7852	0.689303	0.439303	0.378607	0.514525		843	109	60	33		35.4839	88.5504	23.2394	93.3555	0.620171	0.314211	0.240343	0.655242		882	110
	BIOHIT	R=4 / Pg1=140	143	0.136842		880	121	22	22		50	87.9121	15.3846	97.561	0.68956	0.43956	0.379121	0.514404		882	123	20	20		50	87.7612	13.986	97.7827	0.688806	0.438806	0.377612	0.514761		842	110	60	33		35.4839	88.4454	23.0769	93.3481	0.619646	0.313838	0.239292	0.655427		881	111
	BIOHIT	R=4 / Pg1=145	143	0.136842		880	121	22	22		50	87.9121	15.3846	97.561	0.68956	0.43956	0.379121	0.514404		882	123	20	20		50	87.7612	13.986	97.7827	0.688806	0.438806	0.377612	0.514761		842	110	60	33		35.4839	88.4454	23.0769	93.3481	0.619646	0.313838	0.239292	0.655427		881	111
	BIOHIT	R=4 / Pg1=150	144	0.137799		879	122	22	22		50	87.8122	15.2778	97.5583	0.689061	0.439061	0.378122	0.51464		881	124	20	20		50	87.6617	13.8889	97.7802	0.688308	0.438308	0.376617	0.514998		841	111	60	33		35.4839	88.3403	22.9167	93.3407	0.619121	0.313466	0.238242	0.655613		880	112
	BIOHIT	R=4.5 / Pg1=0	2	0.00191388		1000	1	43	1		2.27273	99.9001	50	95.8773	0.510864	0.0227046	0.0217283	0.977273		1004	1	39	1		2.5	99.9005	50	96.2608	0.512002	0.0249751	0.024005	0.975001		951	1	92	1		1.07527	99.895	50	91.1793	0.504851	0.0107414	0.00970227	0.989248		992	0
	BIOHIT	R=4.5 / Pg1=5	12	0.0114833		995	6	38	6		13.6364	99.4006	50	96.3214	0.565185	0.135546	0.13037	0.863657		998	7	35	5		12.5	99.3035	41.6667	96.6118	0.559017	0.124129	0.118035	0.875028		946	6	87	6		6.45161	99.3697	50	91.5779	0.529107	0.0641095	0.0582136	0.935505		988	4
	BIOHIT	R=4.5 / Pg1=10	30	0.0287081		978	23	37	7		15.9091	97.7023	23.3333	96.3547	0.568057	0.155435	0.136114	0.841223		981	24	34	6		15	97.6119	20	96.6502	0.56306	0.146418	0.126119	0.850335		930	22	85	8		8.60215	97.6891	26.6667	91.6256	0.531456	0.0840336	0.0629123	0.914271		976	16
	BIOHIT	R=4.5 / Pg1=15	42	0.0401914		969	32	34	10		22.7273	96.8032	23.8095	96.6102	0.597652	0.220007	0.195305	0.773388		972	33	31	9		22.5	96.7164	21.4286	96.9093	0.596082	0.217612	0.192164	0.775695		922	30	81	12		12.9032	96.8487	28.5714	91.9242	0.54876	0.124966	0.0975197	0.871538		969	23
	BIOHIT	R=4.5 / Pg1=20	54	0.0516746		958	43	33	11		25	95.7043	20.3704	96.67	0.603521	0.239261	0.207043	0.751229		961	44	30	10		25	95.6219	18.5185	96.9728	0.603109	0.239055	0.206219	0.751277		911	41	80	13		13.9785	95.6933	24.0741	91.9273	0.548359	0.133765	0.0967177	0.861292		959	33
	BIOHIT	R=4.5 / Pg1=25	60	0.0574163		953	48	32	12		27.2727	95.2048	20	96.7513	0.612388	0.259649	0.224775	0.728852		956	49	29	11		27.5	95.1244	18.3333	97.0558	0.613122	0.261592	0.226244	0.726638		906	46	79	14		15.0538	95.1681	23.3333	91.9797	0.551109	0.143264	0.102218	0.850836		954	38
	BIOHIT	R=4.5 / Pg1=30	69	0.0660287		946	55	30	14		31.8182	94.5055	20.2899	96.9262	0.631618	0.300699	0.263237	0.684029		949	56	27	13		32.5	94.4279	18.8406	97.2336	0.634639	0.306891	0.269279	0.677296		901	51	75	18		19.3548	94.6429	26.087	92.3156	0.569988	0.18318	0.139977	0.808229		947	45
	BIOHIT	R=4.5 / Pg1=35	79	0.0755981		937	64	29	15		34.0909	93.6064	18.9873	96.9979	0.638487	0.319113	0.276973	0.662185		940	65	26	14		35	93.5323	17.7215	97.3085	0.642662	0.327363	0.285323	0.65321		893	59	73	20		21.5054	93.8025	25.3165	92.4431	0.576539	0.201726	0.153079	0.787389		938	54
	BIOHIT	R=4.5 / Pg1=40	88	0.0842105		928	73	29	15		34.0909	92.7073	17.0455	96.9697	0.633991	0.316048	0.267982	0.663113		931	74	26	14		35	92.6368	15.9091	97.2832	0.638184	0.324229	0.276368	0.654157		885	67	72	21		22.5806	92.9622	23.8636	92.4765	0.577714	0.209915	0.155428	0.777386		929	63
	BIOHIT	R=4.5 / Pg1=45	96	0.091866		922	79	27	17		38.6364	92.1079	17.7083	97.1549	0.653721	0.355871	0.307443	0.618691		925	80	24	16		40	92.0398	16.6667	97.471	0.660199	0.368159	0.320398	0.605257		881	71	68	25		26.8817	92.542	26.0417	92.8346	0.597119	0.248769	0.194237	0.734976		923	69
	BIOHIT	R=4.5 / Pg1=50	101	0.0966507		918	83	26	18		40.9091	91.7083	17.8218	97.2458	0.663087	0.37517	0.326174	0.596698		921	84	23	17		42.5	91.6418	16.8317	97.5636	0.670709	0.389478	0.341418	0.581043		877	75	67	26		27.957	92.1218	25.7426	92.9025	0.600394	0.257545	0.200788	0.724725		919	73
	BIOHIT	R=4.5 / Pg1=55	106	0.101435		913	88	26	18		40.9091	91.2088	16.9811	97.2311	0.660589	0.373127	0.321179	0.597413		916	89	23	17		42.5	91.1443	16.0377	97.5506	0.668221	0.387363	0.336443	0.581779		873	79	66	27		29.0323	91.7017	25.4717	92.9712	0.60367	0.266231	0.207339	0.714513		914	78
	BIOHIT	R=4.5 / Pg1=60	117	0.111962		903	98	25	19		43.1818	90.2098	16.2393	97.306	0.666958	0.389542	0.333916	0.576555		906	99	22	18		45	90.1493	15.3846	97.6293	0.675746	0.405672	0.351493	0.558752		866	86	62	31		33.3333	90.9664	26.4957	93.319	0.621499	0.303221	0.242997	0.672759		904	88
	BIOHIT	R=4.5 / Pg1=65	125	0.119617		898	103	22	22		50	89.7103	17.6	97.6087	0.698551	0.448551	0.397103	0.510478		901	104	19	21		52.5	89.6517	16.8	97.9348	0.710759	0.470672	0.421517	0.486142		861	91	59	34		36.5591	90.4412	27.2	93.587	0.635002	0.330645	0.270003	0.641569		898	94
	BIOHIT	R=4.5 / Pg1=70	127	0.121531		896	105	22	22		50	89.5105	17.3228	97.6035	0.697552	0.447552	0.395105	0.510885		899	106	19	21		52.5	89.4527	16.5354	97.9303	0.709764	0.469627	0.419527	0.486569		859	93	59	34		36.5591	90.2311	26.7717	93.573	0.633951	0.329877	0.267902	0.641886		897	95
	BIOHIT	R=4.5 / Pg1=75	134	0.12823		889	112	22	22		50	88.8112	16.4179	97.5851	0.694056	0.444056	0.388112	0.512366		892	113	19	21		52.5	88.7562	15.6716	97.9144	0.706281	0.46597	0.412562	0.488126		853	99	58	35		37.6344	89.6008	26.1194	93.6334	0.636176	0.337207	0.272352	0.632267		890	102
	BIOHIT	R=4.5 / Pg1=80	143	0.136842		881	120	21	23		52.2727	88.012	16.0839	97.6718	0.701424	0.460063	0.402847	0.492098		883	122	19	21		52.5	87.8607	14.6853	97.8936	0.701803	0.461269	0.403607	0.490267		845	107	57	36		38.7097	88.7605	25.1748	93.6807	0.637351	0.343589	0.274702	0.623124		882	110
	BIOHIT	R=4.5 / Pg1=85	149	0.142584		876	125	20	24		54.5455	87.5125	16.1074	97.7679	0.71029	0.477341	0.420579	0.471387		878	127	18	22		55	87.3632	14.7651	97.9911	0.711816	0.480498	0.423632	0.467407		840	112	56	37		39.7849	88.2353	24.8322	93.75	0.640101	0.351044	0.280202	0.613536		876	116
	BIOHIT	R=4.5 / Pg1=90	153	0.146411		872	129	20	24		54.5455	87.1129	15.6863	97.7578	0.708292	0.475161	0.416583	0.472461		874	131	18	22		55	86.9652	14.3791	97.9821	0.709826	0.478308	0.419652	0.468498		836	116	56	37		39.7849	87.8151	24.183	93.722	0.638	0.349372	0.276001	0.614355		872	120
	BIOHIT	R=4.5 / Pg1=95	157	0.150239		868	133	20	24		54.5455	86.7133	15.2866	97.7477	0.706294	0.472982	0.412587	0.473567		870	135	18	22		55	86.5672	14.0127	97.973	0.707836	0.476119	0.415672	0.469621		832	120	56	37		39.7849	87.395	23.5669	93.6937	0.6359	0.3477	0.271799	0.615202		868	124
	BIOHIT	R=4.5 / Pg1=100	162	0.155024		863	138	20	24		54.5455	86.2138	14.8148	97.735	0.703796	0.470257	0.407592	0.474992		865	140	18	22		55	86.0697	13.5802	97.9615	0.705348	0.473383	0.410697	0.471068		828	124	55	38		40.8602	86.9748	23.4568	93.7712	0.639175	0.355381	0.27835	0.605572		863	129
	BIOHIT	R=4.5 / Pg1=105	164	0.156938		861	140	20	24		54.5455	86.014	14.6341	97.7299	0.702797	0.469167	0.405594	0.475576		863	142	18	22		55	85.8706	13.4146	97.9569	0.704353	0.472289	0.408706	0.471661		826	126	55	38		40.8602	86.7647	23.1707	93.7571	0.638125	0.354522	0.276249	0.606027		861	131
	BIOHIT	R=4.5 / Pg1=110	168	0.160766		857	144	20	24		54.5455	85.6144	14.2857	97.7195	0.700799	0.466988	0.401598	0.476766		859	146	18	22		55	85.4726	13.0952	97.9475	0.702363	0.4701	0.404726	0.472868		822	130	55	38		40.8602	86.3445	22.619	93.7286	0.636024	0.352806	0.272048	0.606958		857	135
	BIOHIT	R=4.5 / Pg1=115	172	0.164593		853	148	20	24		54.5455	85.2148	13.9535	97.709	0.698801	0.464808	0.397602	0.477987		855	150	18	22		55	85.0746	12.7907	97.9381	0.700373	0.46791	0.400746	0.474106		818	134	55	38		40.8602	85.9244	22.093	93.6999	0.633923	0.351089	0.267846	0.607918		853	139
	BIOHIT	R=4.5 / Pg1=120	175	0.167464		850	151	20	24		54.5455	84.9151	13.7143	97.7011	0.697303	0.463173	0.394605	0.478923		852	153	18	22		55	84.7761	12.5714	97.931	0.698881	0.466269	0.397761	0.475054		815	137	55	38		40.8602	85.6092	21.7143	93.6782	0.632347	0.349801	0.264695	0.608655		850	142
	BIOHIT	R=4.5 / Pg1=125	177	0.169378		848	153	20	24		54.5455	84.7153	13.5593	97.6959	0.696304	0.462083	0.392607	0.479556		850	155	18	22		55	84.5771	12.4294	97.9263	0.697886	0.465174	0.395771	0.475696		813	139	55	38		40.8602	85.3992	21.4689	93.6636	0.631297	0.348943	0.262594	0.609155		848	144
	BIOHIT	R=4.5 / Pg1=130	179	0.171292		846	155	20	24		54.5455	84.5155	13.4078	97.6905	0.695305	0.460994	0.390609	0.480196		848	157	18	22		55	84.3781	12.2905	97.9215	0.696891	0.46408	0.393781	0.476345		811	141	55	38		40.8602	85.1891	21.2291	93.649	0.630246	0.348084	0.260493	0.609662		847	145
	BIOHIT	R=4.5 / Pg1=135	180	0.172249		846	155	19	25		56.8182	84.5155	13.8889	97.8035	0.706668	0.480202	0.413337	0.458742		848	157	17	23		57.5	84.3781	12.7778	98.0347	0.709391	0.485174	0.418781	0.452802		811	141	54	39		41.9355	85.1891	21.6667	93.7572	0.635623	0.357245	0.271246	0.599237		847	145
	BIOHIT	R=4.5 / Pg1=140	181	0.173206		845	156	19	25		56.8182	84.4156	13.8122	97.8009	0.706169	0.479634	0.412338	0.45908		847	158	17	23		57.5	84.2786	12.7072	98.0324	0.708893	0.484602	0.417786	0.453146		810	142	54	39		41.9355	85.084	21.547	93.75	0.635098	0.356804	0.270195	0.599498		846	146
	BIOHIT	R=4.5 / Pg1=145	181	0.173206		845	156	19	25		56.8182	84.4156	13.8122	97.8009	0.706169	0.479634	0.412338	0.45908		847	158	17	23		57.5	84.2786	12.7072	98.0324	0.708893	0.484602	0.417786	0.453146		810	142	54	39		41.9355	85.084	21.547	93.75	0.635098	0.356804	0.270195	0.599498		846	146
	BIOHIT	R=4.5 / Pg1=150	182	0.174163		844	157	19	25		56.8182	84.3157	13.7363	97.7984	0.705669	0.479066	0.411339	0.45942		846	159	17	23		57.5	84.1791	12.6374	98.0301	0.708396	0.48403	0.416791	0.453492		809	143	54	39		41.9355	84.979	21.4286	93.7428	0.634572	0.356364	0.269145	0.59976		845	147
	BIOHIT	R=5 / Pg1=0	2	0.00191388		1000	1	43	1		2.27273	99.9001	50	95.8773	0.510864	0.0227046	0.0217283	0.977273		1004	1	39	1		2.5	99.9005	50	96.2608	0.512002	0.0249751	0.024005	0.975001		951	1	92	1		1.07527	99.895	50	91.1793	0.504851	0.0107414	0.00970227	0.989248		992	0
	BIOHIT	R=5 / Pg1=5	12	0.0114833		995	6	38	6		13.6364	99.4006	50	96.3214	0.565185	0.135546	0.13037	0.863657		998	7	35	5		12.5	99.3035	41.6667	96.6118	0.559017	0.124129	0.118035	0.875028		946	6	87	6		6.45161	99.3697	50	91.5779	0.529107	0.0641095	0.0582136	0.935505		988	4
	BIOHIT	R=5 / Pg1=10	30	0.0287081		978	23	37	7		15.9091	97.7023	23.3333	96.3547	0.568057	0.155435	0.136114	0.841223		981	24	34	6		15	97.6119	20	96.6502	0.56306	0.146418	0.126119	0.850335		930	22	85	8		8.60215	97.6891	26.6667	91.6256	0.531456	0.0840336	0.0629123	0.914271		976	16
	BIOHIT	R=5 / Pg1=15	42	0.0401914		969	32	34	10		22.7273	96.8032	23.8095	96.6102	0.597652	0.220007	0.195305	0.773388		972	33	31	9		22.5	96.7164	21.4286	96.9093	0.596082	0.217612	0.192164	0.775695		922	30	81	12		12.9032	96.8487	28.5714	91.9242	0.54876	0.124966	0.0975197	0.871538		969	23
	BIOHIT	R=5 / Pg1=20	54	0.0516746		958	43	33	11		25	95.7043	20.3704	96.67	0.603521	0.239261	0.207043	0.751229		961	44	30	10		25	95.6219	18.5185	96.9728	0.603109	0.239055	0.206219	0.751277		911	41	80	13		13.9785	95.6933	24.0741	91.9273	0.548359	0.133765	0.0967177	0.861292		959	33
	BIOHIT	R=5 / Pg1=25	61	0.0583732		952	49	32	12		27.2727	95.1049	19.6721	96.748	0.611888	0.259377	0.223776	0.728918		955	50	29	11		27.5	95.0249	18.0328	97.0528	0.612624	0.261318	0.225249	0.726705		905	47	79	14		15.0538	95.063	22.9508	91.9715	0.550584	0.143106	0.101168	0.850896		953	39
	BIOHIT	R=5 / Pg1=30	71	0.0679426		944	57	30	14		31.8182	94.3057	19.7183	96.9199	0.630619	0.300064	0.261239	0.684192		947	58	27	13		32.5	94.2289	18.3099	97.2279	0.633644	0.306244	0.267289	0.677463		899	53	75	18		19.3548	94.4328	25.3521	92.2998	0.568938	0.182773	0.137876	0.808371		945	47
	BIOHIT	R=5 / Pg1=35	82	0.0784689		935	66	28	16		36.3636	93.4066	19.5122	97.0924	0.648851	0.33966	0.297702	0.63977		938	67	25	15		37.5	93.3333	18.2927	97.4039	0.654167	0.35	0.308333	0.628545		891	61	72	21		22.5806	93.5924	25.6098	92.5234	0.580865	0.211338	0.161731	0.776841		935	57
	BIOHIT	R=5 / Pg1=40	91	0.0870813		926	75	28	16		36.3636	92.5075	17.5824	97.065	0.644356	0.336391	0.288711	0.640759		929	76	25	15		37.5	92.4378	16.4835	97.3795	0.649689	0.346642	0.299378	0.629558		883	69	71	22		23.6559	92.7521	24.1758	92.5577	0.58204	0.219414	0.16408	0.766874		926	66
	BIOHIT	R=5 / Pg1=45	100	0.0956938		919	82	26	18		40.9091	91.8082	18	97.2487	0.663586	0.375579	0.327173	0.59656		922	83	23	17		42.5	91.7413	17	97.5661	0.671206	0.3899	0.342413	0.580901		879	73	66	27		29.0323	92.3319	27	93.0159	0.606821	0.26806	0.213642	0.713808		919	73
	BIOHIT	R=5 / Pg1=50	105	0.100478		915	86	25	19		43.1818	91.4086	18.0952	97.3404	0.672952	0.394719	0.345904	0.574641		918	87	22	18		45	91.3433	17.1429	97.6596	0.681716	0.411045	0.363433	0.556771		875	77	65	28		30.1075	91.9118	26.6667	93.0851	0.610096	0.276724	0.220193	0.703589		915	77
	BIOHIT	R=5 / Pg1=55	112	0.107177		908	93	25	19		43.1818	90.7093	16.9643	97.3205	0.669456	0.391699	0.338911	0.575728		911	94	22	18		45	90.6468	16.0714	97.642	0.678234	0.40791	0.356468	0.557896		869	83	64	29		31.1828	91.2815	25.8929	93.1404	0.612322	0.284641	0.224643	0.693673		908	84
	BIOHIT	R=5 / Pg1=60	127	0.121531		894	107	24	20		45.4545	89.3107	15.748	97.3856	0.673826	0.405958	0.347652	0.55583		897	108	21	19		47.5	89.2537	14.9606	97.7124	0.683769	0.423955	0.367537	0.535885		858	94	60	33		35.4839	90.1261	25.9843	93.4641	0.62805	0.319802	0.256099	0.652673		894	98
	BIOHIT	R=5 / Pg1=65	136	0.130144		888	113	21	23		52.2727	88.7113	16.9118	97.6898	0.70492	0.463718	0.40984	0.490441		891	114	18	22		55	88.6567	16.1765	98.0198	0.718284	0.487612	0.436567	0.464077		852	100	57	36		38.7097	89.4958	26.4706	93.7294	0.641027	0.346435	0.282055	0.621839		887	105
	BIOHIT	R=5 / Pg1=70	140	0.133971		884	117	21	23		52.2727	88.3117	16.4286	97.6796	0.702922	0.461629	0.405844	0.491377		887	118	18	22		55	88.2587	15.7143	98.011	0.716294	0.485423	0.432587	0.465065		848	104	57	36		38.7097	89.0756	25.7143	93.7017	0.638927	0.344809	0.277853	0.622563		884	108
	BIOHIT	R=5 / Pg1=75	149	0.142584		876	125	20	24		54.5455	87.5125	16.1074	97.7679	0.71029	0.477341	0.420579	0.471387		878	127	18	22		55	87.3632	14.7651	97.9911	0.711816	0.480498	0.423632	0.467407		841	111	55	38		40.8602	88.3403	25.5034	93.8616	0.646003	0.360961	0.292006	0.602782		876	116
	BIOHIT	R=5 / Pg1=80	160	0.15311		866	135	19	25		56.8182	86.5135	15.625	97.8531	0.716658	0.491554	0.433317	0.452389		867	138	18	22		55	86.2687	13.75	97.9661	0.706343	0.474478	0.412687	0.470484		832	120	53	40		43.0108	87.395	25	94.0113	0.652029	0.375892	0.304057	0.583666		866	126
	BIOHIT	R=5 / Pg1=85	168	0.160766		859	142	18	26		59.0909	85.8142	15.4762	97.9475	0.724525	0.507084	0.449051	0.432989		860	145	17	23		57.5	85.5721	13.6905	98.0616	0.715361	0.49204	0.430721	0.448822		825	127	52	41		44.086	86.6597	24.4048	94.0707	0.653728	0.382048	0.307457	0.574834		858	134
	BIOHIT	R=5 / Pg1=90	174	0.166507		854	147	17	27		61.3636	85.3147	15.5172	98.0482	0.733392	0.523522	0.466783	0.413331		854	151	17	23		57.5	84.9751	13.2184	98.0482	0.712376	0.488607	0.424751	0.450777		820	132	51	42		45.1613	86.1345	24.1379	94.1447	0.656479	0.388994	0.312957	0.565645		853	139
	BIOHIT	R=5 / Pg1=95	179	0.171292		849	152	17	27		61.3636	84.8152	15.0838	98.037	0.730894	0.520457	0.461788	0.415132		849	156	17	23		57.5	84.4776	12.8492	98.037	0.709888	0.485746	0.419776	0.452459		815	137	51	42		45.1613	85.6092	23.4637	94.1109	0.653853	0.386622	0.307705	0.566955		848	144
	BIOHIT	R=5 / Pg1=100	184	0.176077		844	157	17	27		61.3636	84.3157	14.6739	98.0256	0.728397	0.517392	0.456793	0.416985		844	161	17	23		57.5	83.9801	12.5	98.0256	0.7074	0.482886	0.414801	0.45419		811	141	50	43		46.2366	85.1891	23.3696	94.1928	0.657128	0.393885	0.314256	0.557662		843	149
	BIOHIT	R=5 / Pg1=105	186	0.17799		842	159	17	27		61.3636	84.1159	14.5161	98.021	0.727398	0.516166	0.454795	0.417741		842	163	17	23		57.5	83.7811	12.3656	98.021	0.706405	0.481741	0.412811	0.454896		809	143	50	43		46.2366	84.979	23.1183	94.1793	0.656078	0.392914	0.312156	0.558224		841	151
	BIOHIT	R=5 / Pg1=110	192	0.183732		837	164	16	28		63.6364	83.6164	14.5833	98.1243	0.736264	0.532104	0.472527	0.39884		837	168	16	24		60	83.2836	12.5	98.1243	0.716418	0.499701	0.432836	0.433525		805	147	48	45		48.3871	84.5588	23.4375	94.3728	0.66473	0.409156	0.329459	0.538732		836	156
	BIOHIT	R=5 / Pg1=115	197	0.188517		832	169	16	28		63.6364	83.1169	14.2132	98.1132	0.733766	0.528926	0.467532	0.400918		832	173	16	24		60	82.7861	12.1827	98.1132	0.71393	0.496716	0.427861	0.435467		800	152	48	45		48.3871	84.0336	22.8426	94.3396	0.662104	0.406614	0.324207	0.540261		831	161
	BIOHIT	R=5 / Pg1=120	201	0.192344		828	173	16	28		63.6364	82.7173	13.9303	98.1043	0.731768	0.526383	0.463536	0.402617		828	177	16	24		60	82.3881	11.9403	98.1043	0.71194	0.494328	0.423881	0.437056		796	156	48	45		48.3871	83.6134	22.3881	94.3128	0.660003	0.404581	0.320005	0.541517		827	165
	BIOHIT	R=5 / Pg1=125	203	0.194258		826	175	16	28		63.6364	82.5175	13.7931	98.0998	0.730769	0.525111	0.461538	0.403479		826	179	16	24		60	82.1891	11.8227	98.0998	0.710945	0.493134	0.421891	0.437862		794	158	48	45		48.3871	83.4034	22.1675	94.2993	0.658952	0.403565	0.317905	0.542157		825	167
	BIOHIT	R=5 / Pg1=130	206	0.197129		823	178	16	28		63.6364	82.2178	13.5922	98.093	0.729271	0.523204	0.458541	0.404787		823	182	16	24		60	81.8905	11.6505	98.093	0.709453	0.491343	0.418905	0.439085		791	161	48	45		48.3871	83.0882	21.8447	94.2789	0.657377	0.40204	0.314753	0.54313		823	169
	BIOHIT	R=5 / Pg1=135	207	0.198086		823	178	15	29		65.9091	82.2178	14.0097	98.21	0.740634	0.54189	0.481269	0.384499		823	182	15	25		62.5	81.8905	12.0773	98.21	0.721953	0.511816	0.443905	0.416438		791	161	47	46		49.4624	83.0882	22.2222	94.3914	0.662753	0.410974	0.325506	0.532922		823	169
	BIOHIT	R=5 / Pg1=140	209	0.2		821	180	15	29		65.9091	82.018	13.8756	98.2057	0.739635	0.540573	0.479271	0.385427		821	184	15	25		62.5	81.6915	11.9617	98.2057	0.720958	0.510572	0.441915	0.417307		789	163	47	46		49.4624	82.8782	22.0096	94.378	0.661703	0.409935	0.323405	0.533593		821	171
	BIOHIT	R=5 / Pg1=145	210	0.200957		820	181	15	29		65.9091	81.9181	13.8095	98.2036	0.739136	0.539915	0.478272	0.385895		820	185	15	25		62.5	81.592	11.9048	98.2036	0.72046	0.50995	0.44092	0.417744		788	164	47	46		49.4624	82.7731	21.9048	94.3713	0.661177	0.409415	0.322355	0.533931		820	172
	BIOHIT	R=5 / Pg1=150	211	0.201914		819	182	15	29		65.9091	81.8182	13.7441	98.2014	0.738636	0.539256	0.477273	0.386364		819	186	15	25		62.5	81.4925	11.8483	98.2014	0.719963	0.509328	0.439925	0.418184		787	165	47	46		49.4624	82.6681	21.8009	94.3645	0.660652	0.408896	0.321304	0.53427		819	173
	BIOHIT	R=5.5 / Pg1=0	2	0.00191388		1000	1	43	1		2.27273	99.9001	50	95.8773	0.510864	0.0227046	0.0217283	0.977273		1004	1	39	1		2.5	99.9005	50	96.2608	0.512002	0.0249751	0.024005	0.975001		951	1	92	1		1.07527	99.895	50	91.1793	0.504851	0.0107414	0.00970227	0.989248		992	0
	BIOHIT	R=5.5 / Pg1=5	12	0.0114833		995	6	38	6		13.6364	99.4006	50	96.3214	0.565185	0.135546	0.13037	0.863657		998	7	35	5		12.5	99.3035	41.6667	96.6118	0.559017	0.124129	0.118035	0.875028		946	6	87	6		6.45161	99.3697	50	91.5779	0.529107	0.0641095	0.0582136	0.935505		988	4
	BIOHIT	R=5.5 / Pg1=10	30	0.0287081		978	23	37	7		15.9091	97.7023	23.3333	96.3547	0.568057	0.155435	0.136114	0.841223		981	24	34	6		15	97.6119	20	96.6502	0.56306	0.146418	0.126119	0.850335		930	22	85	8		8.60215	97.6891	26.6667	91.6256	0.531456	0.0840336	0.0629123	0.914271		976	16
	BIOHIT	R=5.5 / Pg1=15	42	0.0401914		969	32	34	10		22.7273	96.8032	23.8095	96.6102	0.597652	0.220007	0.195305	0.773388		972	33	31	9		22.5	96.7164	21.4286	96.9093	0.596082	0.217612	0.192164	0.775695		922	30	81	12		12.9032	96.8487	28.5714	91.9242	0.54876	0.124966	0.0975197	0.871538		969	23
	BIOHIT	R=5.5 / Pg1=20	54	0.0516746		958	43	33	11		25	95.7043	20.3704	96.67	0.603521	0.239261	0.207043	0.751229		961	44	30	10		25	95.6219	18.5185	96.9728	0.603109	0.239055	0.206219	0.751277		911	41	80	13		13.9785	95.6933	24.0741	91.9273	0.548359	0.133765	0.0967177	0.861292		959	33
	BIOHIT	R=5.5 / Pg1=25	62	0.0593301		951	50	32	12		27.2727	95.005	19.3548	96.7447	0.611389	0.259105	0.222777	0.728986		954	51	29	11		27.5	94.9254	17.7419	97.0498	0.612127	0.261045	0.224254	0.726774		904	48	79	14		15.0538	94.958	22.5806	91.9634	0.550059	0.142948	0.100117	0.850957		952	40
	BIOHIT	R=5.5 / Pg1=30	72	0.0688995		943	58	30	14		31.8182	94.2058	19.4444	96.9168	0.63012	0.299746	0.26024	0.684276		946	59	27	13		32.5	94.1294	18.0556	97.2251	0.633147	0.30592	0.266294	0.677548		898	54	75	18		19.3548	94.3277	25	92.2919	0.568413	0.18257	0.136826	0.808444		944	48
	BIOHIT	R=5.5 / Pg1=35	84	0.0803828		933	68	28	16		36.3636	93.2068	19.0476	97.0864	0.647852	0.338934	0.295704	0.639979		936	69	25	15		37.5	93.1343	17.8571	97.3985	0.653172	0.349254	0.306343	0.62876		889	63	72	21		22.5806	93.3824	25	92.5078	0.579815	0.210863	0.15963	0.777017		934	58
	BIOHIT	R=5.5 / Pg1=40	95	0.0909091		922	79	28	16		36.3636	92.1079	16.8421	97.0526	0.642358	0.334938	0.284715	0.641239		925	80	25	15		37.5	92.0398	15.7895	97.3684	0.647699	0.345149	0.295398	0.630049		879	73	71	22		23.6559	92.3319	23.1579	92.5263	0.579939	0.21842	0.159878	0.767282		923	69
	BIOHIT	R=5.5 / Pg1=45	106	0.101435		913	88	26	18		40.9091	91.2088	16.9811	97.2311	0.660589	0.373127	0.321179	0.597413		916	89	23	17		42.5	91.1443	16.0377	97.5506	0.668221	0.387363	0.336443	0.581779		873	79	66	27		29.0323	91.7017	25.4717	92.9712	0.60367	0.266231	0.207339	0.714513		914	78
	BIOHIT	R=5.5 / Pg1=50	113	0.108134		907	94	25	19		43.1818	90.6094	16.8142	97.3176	0.668956	0.391268	0.337912	0.57589		910	95	22	18		45	90.5473	15.9292	97.6395	0.677736	0.407463	0.355473	0.558064		867	85	65	28		30.1075	91.0714	24.7788	93.0258	0.605895	0.274194	0.21179	0.704605		908	84
	BIOHIT	R=5.5 / Pg1=55	123	0.117703		897	104	25	19		43.1818	89.6104	15.4472	97.2885	0.663961	0.386954	0.327922	0.577603		900	105	22	18		45	89.5522	14.6341	97.6139	0.672761	0.402985	0.345522	0.559835		858	94	64	29		31.1828	90.1261	23.5772	93.0586	0.606544	0.281038	0.213088	0.69522		898	94
	BIOHIT	R=5.5 / Pg1=60	140	0.133971		881	120	24	20		45.4545	88.012	14.2857	97.3481	0.667333	0.400054	0.334665	0.558473		884	121	21	19		47.5	87.9602	13.5714	97.6796	0.677301	0.417811	0.354602	0.538629		845	107	60	33		35.4839	88.7605	23.5714	93.3702	0.621222	0.314957	0.242444	0.654878		882	110
	BIOHIT	R=5.5 / Pg1=65	152	0.145455		872	129	21	23		52.2727	87.1129	15.1316	97.6484	0.696928	0.455363	0.393856	0.494365		875	130	18	22		55	87.0647	14.4737	97.9843	0.710323	0.478856	0.420647	0.468222		836	116	57	36		38.7097	87.8151	23.6842	93.617	0.632624	0.33993	0.265248	0.624898		872	120
	BIOHIT	R=5.5 / Pg1=70	160	0.15311		864	137	21	23		52.2727	86.3137	14.375	97.6271	0.692932	0.451185	0.385864	0.496509		867	138	18	22		55	86.2687	13.75	97.9661	0.706343	0.474478	0.412687	0.470484		828	124	57	36		38.7097	86.9748	22.5	93.5593	0.628422	0.336677	0.256845	0.626591		865	127
	BIOHIT	R=5.5 / Pg1=75	174	0.166507		851	150	20	24		54.5455	85.015	13.7931	97.7038	0.697802	0.463718	0.395604	0.478609		853	152	18	22		55	84.8756	12.6437	97.9334	0.699378	0.466816	0.398756	0.474736		817	135	54	39		41.9355	85.8193	22.4138	93.8002	0.638774	0.359888	0.277548	0.597711		852	140
	BIOHIT	R=5.5 / Pg1=80	186	0.17799		840	161	19	25		56.8182	83.9161	13.4409	97.7881	0.703671	0.476796	0.407343	0.460799		841	164	18	22		55	83.6816	11.828	97.9045	0.693408	0.460249	0.386816	0.478674		807	145	52	41		44.086	84.7689	22.043	93.9464	0.644275	0.373712	0.288549	0.579514		841	151
	BIOHIT	R=5.5 / Pg1=85	197	0.188517		831	170	17	27		61.3636	83.017	13.7056	97.9953	0.721903	0.509422	0.443806	0.422042		832	173	16	24		60	82.7861	12.1827	98.1132	0.71393	0.496716	0.427861	0.435467		798	154	50	43		46.2366	83.8235	21.8274	94.1038	0.6503	0.387571	0.300601	0.561443		831	161
	BIOHIT	R=5.5 / Pg1=90	208	0.199043		821	180	16	28		63.6364	82.018	13.4615	98.0884	0.728272	0.521933	0.456543	0.405668		821	184	16	24		60	81.6915	11.5385	98.0884	0.708458	0.490149	0.416915	0.439909		788	164	49	44		47.3118	82.7731	21.1538	94.1458	0.650425	0.391615	0.300849	0.554329		821	171
	BIOHIT	R=5.5 / Pg1=95	216	0.206699		813	188	16	28		63.6364	81.2188	12.963	98.07	0.724276	0.516847	0.448551	0.409274		813	192	16	24		60	80.8955	11.1111	98.07	0.704478	0.485373	0.408955	0.443281		780	172	49	44		47.3118	81.9328	20.3704	94.0893	0.646223	0.387639	0.292446	0.556998		813	179
	BIOHIT	R=5.5 / Pg1=100	222	0.21244		807	194	16	28		63.6364	80.6194	12.6126	98.0559	0.721279	0.513032	0.442557	0.412059		807	198	16	24		60	80.2985	10.8108	98.0559	0.701493	0.481791	0.402985	0.445887		775	177	48	45		48.3871	81.4076	20.2703	94.1677	0.648973	0.393908	0.297947	0.548596		807	185
	BIOHIT	R=5.5 / Pg1=105	225	0.215311		804	197	16	28		63.6364	80.3197	12.4444	98.0488	0.71978	0.511125	0.43956	0.413477		804	201	16	24		60	80	10.6667	98.0488	0.7	0.48	0.4	0.447214		773	179	47	46		49.4624	81.1975	20.4444	94.2683	0.653299	0.401622	0.306598	0.53922		804	188
	BIOHIT	R=5.5 / Pg1=110	236	0.225837		794	207	15	29		65.9091	79.3207	12.2881	98.1459	0.726149	0.522795	0.452298	0.398726		794	211	15	25		62.5	79.005	10.5932	98.1459	0.707525	0.493781	0.41505	0.429772		764	188	45	48		51.6129	80.2521	20.339	94.4376	0.659325	0.414204	0.31865	0.522618		794	198
	BIOHIT	R=5.5 / Pg1=115	242	0.231579		788	213	15	29		65.9091	78.7213	11.9835	98.132	0.723152	0.518845	0.446304	0.401867		788	217	15	25		62.5	78.408	10.3306	98.132	0.70454	0.49005	0.40908	0.43272		758	194	45	48		51.6129	79.6218	19.8347	94.396	0.656174	0.410951	0.312348	0.525031		788	204
	BIOHIT	R=5.5 / Pg1=120	247	0.236364		783	218	15	29		65.9091	78.2218	11.7409	98.1203	0.720654	0.515553	0.441309	0.404534		783	222	15	25		62.5	77.9104	10.1215	98.1203	0.702052	0.48694	0.404104	0.435224		753	199	45	48		51.6129	79.0966	19.4332	94.3609	0.653548	0.408241	0.307095	0.527092		783	209
	BIOHIT	R=5.5 / Pg1=125	250	0.239234		780	221	15	29		65.9091	77.9221	11.6	98.1132	0.719156	0.513577	0.438312	0.406156		780	225	15	25		62.5	77.6119	10	98.1132	0.70056	0.485075	0.401119	0.436747		750	202	45	48		51.6129	78.7815	19.2	94.3396	0.651972	0.406614	0.303944	0.52835		780	212
	BIOHIT	R=5.5 / Pg1=130	253	0.242105		777	224	15	29		65.9091	77.6224	11.4625	98.1061	0.717657	0.511602	0.435315	0.407793		777	228	15	25		62.5	77.3134	9.88142	98.1061	0.699067	0.483209	0.398134	0.438284		747	205	45	48		51.6129	78.4664	18.9723	94.3182	0.650396	0.404988	0.300793	0.529623		778	214
	BIOHIT	R=5.5 / Pg1=135	255	0.244019		776	225	14	30		68.1818	77.5225	11.7647	98.2278	0.728521	0.528562	0.457043	0.389568		776	229	14	26		65	77.2139	10.1961	98.2278	0.71107	0.501891	0.422139	0.417637		746	206	44	49		52.6882	78.3613	19.2157	94.4304	0.655248	0.412872	0.310495	0.520254		777	215
	BIOHIT	R=5.5 / Pg1=140	258	0.24689		773	228	14	30		68.1818	77.2228	11.6279	98.2211	0.727023	0.526519	0.454046	0.391305		773	232	14	26		65	76.9154	10.0775	98.2211	0.709577	0.49995	0.419154	0.419273		743	209	44	49		52.6882	78.0462	18.9922	94.4091	0.653672	0.411211	0.307344	0.521572		774	218
	BIOHIT	R=5.5 / Pg1=145	261	0.249761		770	231	14	30		68.1818	76.9231	11.4943	98.2143	0.725524	0.524476	0.451049	0.393057		770	235	14	26		65	76.6169	9.96169	98.2143	0.708085	0.49801	0.416169	0.420924		740	212	44	49		52.6882	77.7311	18.7739	94.3878	0.652096	0.409551	0.304193	0.522907		771	221
	BIOHIT	R=5.5 / Pg1=150	262	0.250718		769	232	14	30		68.1818	76.8232	11.4504	98.212	0.725025	0.523794	0.45005	0.393645		769	236	14	26		65	76.5174	9.92366	98.212	0.707587	0.497363	0.415174	0.421477		739	213	44	49		52.6882	77.6261	18.7023	94.3806	0.651571	0.408997	0.303142	0.523355		770	222
	BIOHIT	R=6 / Pg1=0	2	0.00191388		1000	1	43	1		2.27273	99.9001	50	95.8773	0.510864	0.0227046	0.0217283	0.977273		1004	1	39	1		2.5	99.9005	50	96.2608	0.512002	0.0249751	0.024005	0.975001		951	1	92	1		1.07527	99.895	50	91.1793	0.504851	0.0107414	0.00970227	0.989248		992	0
	BIOHIT	R=6 / Pg1=5	12	0.0114833		995	6	38	6		13.6364	99.4006	50	96.3214	0.565185	0.135546	0.13037	0.863657		998	7	35	5		12.5	99.3035	41.6667	96.6118	0.559017	0.124129	0.118035	0.875028		946	6	87	6		6.45161	99.3697	50	91.5779	0.529107	0.0641095	0.0582136	0.935505		988	4
	BIOHIT	R=6 / Pg1=10	30	0.0287081		978	23	37	7		15.9091	97.7023	23.3333	96.3547	0.568057	0.155435	0.136114	0.841223		981	24	34	6		15	97.6119	20	96.6502	0.56306	0.146418	0.126119	0.850335		930	22	85	8		8.60215	97.6891	26.6667	91.6256	0.531456	0.0840336	0.0629123	0.914271		976	16
	BIOHIT	R=6 / Pg1=15	42	0.0401914		969	32	34	10		22.7273	96.8032	23.8095	96.6102	0.597652	0.220007	0.195305	0.773388		972	33	31	9		22.5	96.7164	21.4286	96.9093	0.596082	0.217612	0.192164	0.775695		922	30	81	12		12.9032	96.8487	28.5714	91.9242	0.54876	0.124966	0.0975197	0.871538		969	23
	BIOHIT	R=6 / Pg1=20	54	0.0516746		958	43	33	11		25	95.7043	20.3704	96.67	0.603521	0.239261	0.207043	0.751229		961	44	30	10		25	95.6219	18.5185	96.9728	0.603109	0.239055	0.206219	0.751277		911	41	80	13		13.9785	95.6933	24.0741	91.9273	0.548359	0.133765	0.0967177	0.861292		959	33
	BIOHIT	R=6 / Pg1=25	63	0.0602871		950	51	32	12		27.2727	94.9051	19.0476	96.7413	0.610889	0.258832	0.221778	0.729055		953	52	29	11		27.5	94.8259	17.4603	97.0468	0.611629	0.260771	0.223259	0.726844		903	49	79	14		15.0538	94.8529	22.2222	91.9552	0.549534	0.142789	0.099067	0.85102		951	41
	BIOHIT	R=6 / Pg1=30	73	0.0698565		942	59	30	14		31.8182	94.1059	19.1781	96.9136	0.62962	0.299428	0.259241	0.684361		945	60	27	13		32.5	94.0299	17.8082	97.2222	0.632649	0.305597	0.265299	0.677635		897	55	75	18		19.3548	94.2227	24.6575	92.284	0.567888	0.182366	0.135775	0.808518		943	49
	BIOHIT	R=6 / Pg1=35	85	0.0813397		932	69	28	16		36.3636	93.1069	18.8235	97.0833	0.647353	0.338571	0.294705	0.640086		935	70	25	15		37.5	93.0348	17.6471	97.3958	0.652674	0.348881	0.305348	0.628869		888	64	72	21		22.5806	93.2773	24.7059	92.5	0.57929	0.210626	0.15858	0.777107		933	59
	BIOHIT	R=6 / Pg1=40	97	0.092823		920	81	28	16		36.3636	91.9081	16.4948	97.0464	0.641359	0.334211	0.282717	0.641488		923	82	25	15		37.5	91.8408	15.4639	97.3629	0.646704	0.344403	0.293408	0.630303		877	75	71	22		23.6559	92.1218	22.6804	92.5105	0.578889	0.217923	0.157778	0.767495		921	71
	BIOHIT	R=6 / Pg1=45	110	0.105263		909	92	26	18		40.9091	90.8092	16.3636	97.2193	0.658591	0.371492	0.317183	0.598014		912	93	23	17		42.5	90.7463	15.4545	97.5401	0.666231	0.385672	0.332463	0.582399		869	83	66	27		29.0323	91.2815	24.5455	92.9412	0.601569	0.265011	0.203138	0.715013		910	82
	BIOHIT	R=6 / Pg1=50	120	0.114833		900	101	25	19		43.1818	89.9101	15.8333	97.2973	0.66546	0.388248	0.330919	0.577071		903	102	22	18		45	89.8507	15	97.6216	0.674254	0.404328	0.348507	0.559286		860	92	65	28		30.1075	90.3361	23.3333	92.973	0.602218	0.27198	0.204437	0.705574		901	91
	BIOHIT	R=6 / Pg1=55	135	0.129187		885	116	25	19		43.1818	88.4116	14.0741	97.2527	0.657967	0.381777	0.315934	0.579879		888	117	22	18		45	88.3582	13.3333	97.5824	0.666791	0.397612	0.333582	0.562186		846	106	64	29		31.1828	88.8655	21.4815	92.967	0.600242	0.277108	0.200483	0.697121		886	106
	BIOHIT	R=6 / Pg1=60	154	0.147368		867	134	24	20		45.4545	86.6134	12.987	97.3064	0.66034	0.393697	0.320679	0.561641		870	135	21	19		47.5	86.5672	12.3377	97.6431	0.670336	0.411194	0.340672	0.541912		831	121	60	33		35.4839	87.2899	21.4286	93.266	0.613869	0.309738	0.227738	0.657562		868	124
	BIOHIT	R=6 / Pg1=65	168	0.160766		856	145	21	23		52.2727	85.5145	13.6905	97.6055	0.688936	0.447008	0.377872	0.498771		859	146	18	22		55	85.4726	13.0952	97.9475	0.702363	0.4701	0.404726	0.472868		820	132	57	36		38.7097	86.1345	21.4286	93.5006	0.624221	0.333424	0.248441	0.628391		856	136
	BIOHIT	R=6 / Pg1=70	178	0.170335		846	155	21	23		52.2727	84.5155	12.9213	97.5779	0.683941	0.441785	0.367882	0.501763		849	156	18	22		55	84.4776	12.3596	97.9239	0.697388	0.464627	0.394776	0.476019		810	142	57	36		38.7097	85.084	20.2247	93.4256	0.618969	0.329358	0.237937	0.630792		847	145
	BIOHIT	R=6 / Pg1=75	197	0.188517		828	173	20	24		54.5455	82.7173	12.1827	97.6415	0.686314	0.451185	0.372627	0.486293		830	175	18	22		55	82.5871	11.1675	97.8774	0.687935	0.454229	0.375871	0.482515		795	157	53	40		43.0108	83.5084	20.3046	93.75	0.632596	0.359176	0.265192	0.593275		829	163
	BIOHIT	R=6 / Pg1=80	213	0.203828		813	188	19	25		56.8182	81.2188	11.7371	97.7163	0.690185	0.46147	0.38037	0.470893		814	191	18	22		55	80.995	10.3286	97.8365	0.679975	0.445473	0.35995	0.488486		781	171	51	42		45.1613	82.0378	19.7183	93.8702	0.635996	0.370493	0.271991	0.577055		814	178
	BIOHIT	R=6 / Pg1=85	225	0.215311		803	198	17	27		61.3636	80.2198	12	97.9268	0.707917	0.492258	0.415834	0.434054		804	201	16	24		60	80	10.6667	98.0488	0.7	0.48	0.4	0.447214		771	181	49	44		47.3118	80.9874	19.5556	94.0244	0.641496	0.383166	0.282992	0.560136		803	189
	BIOHIT	R=6 / Pg1=90	242	0.231579		787	214	16	28		63.6364	78.6214	11.5702	98.0075	0.711289	0.500318	0.422577	0.421825		787	218	16	24		60	78.3085	9.91736	98.0075	0.691542	0.469851	0.383085	0.45503		757	195	46	47		50.5376	79.5168	19.4215	94.2715	0.650272	0.401859	0.300544	0.535358		787	205
	BIOHIT	R=6 / Pg1=95	253	0.242105		776	225	16	28		63.6364	77.5225	11.0672	97.9798	0.705794	0.493325	0.411588	0.427499		776	229	16	24		60	77.2139	9.48617	97.9798	0.68607	0.463284	0.372139	0.460348		746	206	46	47		50.5376	78.3613	18.5771	94.1919	0.644495	0.39602	0.28899	0.539885		776	216
	BIOHIT	R=6 / Pg1=100	260	0.248804		769	232	16	28		63.6364	76.8232	10.7692	97.9618	0.702298	0.488875	0.404595	0.431217		769	236	16	24		60	76.5174	9.23077	97.9618	0.682587	0.459104	0.365174	0.463835		740	212	45	48		51.6129	77.7311	18.4615	94.2675	0.64672	0.401193	0.29344	0.532655		769	223
	BIOHIT	R=6 / Pg1=105	265	0.253589		764	237	16	28		63.6364	76.3237	10.566	97.9487	0.6998	0.485696	0.3996	0.433922		764	241	16	24		60	76.0199	9.0566	97.9487	0.6801	0.456119	0.360199	0.466374		736	216	44	49		52.6882	77.3109	18.4906	94.359	0.649995	0.407337	0.299991	0.52471		764	228
	BIOHIT	R=6 / Pg1=110	278	0.266029		752	249	15	29		65.9091	75.1249	10.4317	98.0443	0.70517	0.495141	0.41034	0.422014		752	253	15	25		62.5	74.8259	8.99281	98.0443	0.686629	0.467662	0.373259	0.451662		725	227	42	51		54.8387	76.1555	18.3453	94.5241	0.654971	0.417627	0.309942	0.510696		752	240
	BIOHIT	R=6 / Pg1=115	286	0.273684		744	257	15	29		65.9091	74.3257	10.1399	98.0237	0.701174	0.489874	0.402348	0.426774		744	261	15	25		62.5	74.0299	8.74126	98.0237	0.682649	0.462687	0.365299	0.456147		717	235	42	51		54.8387	75.3151	17.8322	94.4664	0.650769	0.413018	0.301538	0.514673		744	248
	BIOHIT	R=6 / Pg1=120	292	0.279426		738	263	15	29		65.9091	73.7263	9.93151	98.008	0.698177	0.485923	0.396354	0.430407		738	267	15	25		62.5	73.4328	8.56164	98.008	0.679664	0.458955	0.359328	0.459572		711	241	42	51		54.8387	74.6849	17.4658	94.4223	0.647618	0.409562	0.295236	0.517726		738	254
	BIOHIT	R=6 / Pg1=125	297	0.284211		733	268	15	29		65.9091	73.2268	9.76431	97.9947	0.695679	0.482631	0.391359	0.433474		733	272	15	25		62.5	72.9353	8.41751	97.9947	0.677177	0.455846	0.354353	0.462466		706	246	42	51		54.8387	74.1597	17.1717	94.385	0.644992	0.406682	0.289984	0.520314		733	259
	BIOHIT	R=6 / Pg1=130	301	0.288038		729	272	15	29		65.9091	72.8272	9.63455	97.9839	0.693681	0.479997	0.387363	0.435953		729	276	15	25		62.5	72.5373	8.30565	97.9839	0.675187	0.453358	0.350373	0.464806		702	250	42	51		54.8387	73.7395	16.9435	94.3548	0.642891	0.404378	0.285782	0.522413		730	262
	BIOHIT	R=6 / Pg1=135	306	0.292823		725	276	14	30		68.1818	72.4276	9.80392	98.1055	0.703047	0.493824	0.406094	0.421027		725	280	14	26		65	72.1393	8.49673	98.1055	0.685697	0.468905	0.371393	0.44735		699	253	40	53		56.9892	73.4244	17.3203	94.5873	0.652068	0.41844	0.304136	0.505588		726	266
	BIOHIT	R=6 / Pg1=140	309	0.295694		722	279	14	30		68.1818	72.1279	9.70874	98.0978	0.701548	0.491781	0.403097	0.422996		722	283	14	26		65	71.8408	8.41424	98.0978	0.684204	0.466965	0.368408	0.449215		696	256	40	53		56.9892	73.1092	17.1521	94.5652	0.650492	0.416644	0.300985	0.507251		723	269
	BIOHIT	R=6 / Pg1=145	312	0.298565		719	282	14	30		68.1818	71.8282	9.61538	98.09	0.70005	0.489738	0.4001	0.424976		719	286	14	26		65	71.5423	8.33333	98.09	0.682711	0.465025	0.365423	0.451092		693	259	40	53		56.9892	72.7941	16.9872	94.543	0.648917	0.414848	0.297834	0.508929		720	272
	BIOHIT	R=6 / Pg1=150	313	0.299522		718	283	14	30		68.1818	71.7283	9.58466	98.0874	0.69955	0.489056	0.399101	0.425639		718	287	14	26		65	71.4428	8.30671	98.0874	0.682214	0.464378	0.364428	0.451721		692	260	40	53		56.9892	72.6891	16.9329	94.5355	0.648392	0.41425	0.296783	0.509491		719	273
	BIOHIT	R=6.5 / Pg1=0	2	0.00191388		1000	1	43	1		2.27273	99.9001	50	95.8773	0.510864	0.0227046	0.0217283	0.977273		1004	1	39	1		2.5	99.9005	50	96.2608	0.512002	0.0249751	0.024005	0.975001		951	1	92	1		1.07527	99.895	50	91.1793	0.504851	0.0107414	0.00970227	0.989248		992	0
	BIOHIT	R=6.5 / Pg1=5	12	0.0114833		995	6	38	6		13.6364	99.4006	50	96.3214	0.565185	0.135546	0.13037	0.863657		998	7	35	5		12.5	99.3035	41.6667	96.6118	0.559017	0.124129	0.118035	0.875028		946	6	87	6		6.45161	99.3697	50	91.5779	0.529107	0.0641095	0.0582136	0.935505		988	4
	BIOHIT	R=6.5 / Pg1=10	30	0.0287081		978	23	37	7		15.9091	97.7023	23.3333	96.3547	0.568057	0.155435	0.136114	0.841223		981	24	34	6		15	97.6119	20	96.6502	0.56306	0.146418	0.126119	0.850335		930	22	85	8		8.60215	97.6891	26.6667	91.6256	0.531456	0.0840336	0.0629123	0.914271		976	16
	BIOHIT	R=6.5 / Pg1=15	42	0.0401914		969	32	34	10		22.7273	96.8032	23.8095	96.6102	0.597652	0.220007	0.195305	0.773388		972	33	31	9		22.5	96.7164	21.4286	96.9093	0.596082	0.217612	0.192164	0.775695		922	30	81	12		12.9032	96.8487	28.5714	91.9242	0.54876	0.124966	0.0975197	0.871538		969	23
	BIOHIT	R=6.5 / Pg1=20	54	0.0516746		958	43	33	11		25	95.7043	20.3704	96.67	0.603521	0.239261	0.207043	0.751229		961	44	30	10		25	95.6219	18.5185	96.9728	0.603109	0.239055	0.206219	0.751277		911	41	80	13		13.9785	95.6933	24.0741	91.9273	0.548359	0.133765	0.0967177	0.861292		959	33
	BIOHIT	R=6.5 / Pg1=25	63	0.0602871		950	51	32	12		27.2727	94.9051	19.0476	96.7413	0.610889	0.258832	0.221778	0.729055		953	52	29	11		27.5	94.8259	17.4603	97.0468	0.611629	0.260771	0.223259	0.726844		903	49	79	14		15.0538	94.8529	22.2222	91.9552	0.549534	0.142789	0.099067	0.85102		951	41
	BIOHIT	R=6.5 / Pg1=30	75	0.0717703		940	61	30	14		31.8182	93.9061	18.6667	96.9072	0.628621	0.298792	0.257243	0.684536		943	62	27	13		32.5	93.8308	17.3333	97.2165	0.631654	0.30495	0.263308	0.677813		895	57	75	18		19.3548	94.0126	24	92.268	0.566837	0.18196	0.133674	0.808671		941	51
	BIOHIT	R=6.5 / Pg1=35	90	0.0861244		927	74	28	16		36.3636	92.6074	17.7778	97.0681	0.644855	0.336754	0.28971	0.640643		930	75	25	15		37.5	92.5373	16.6667	97.3822	0.650187	0.347015	0.300373	0.62944		883	69	72	21		22.5806	92.7521	23.3333	92.4607	0.576664	0.20944	0.153327	0.777579		928	64
	BIOHIT	R=6.5 / Pg1=40	105	0.100478		912	89	28	16		36.3636	91.1089	15.2381	97.0213	0.637363	0.331305	0.274725	0.642545		915	90	25	15		37.5	91.0448	14.2857	97.3404	0.642724	0.341418	0.285448	0.631383		869	83	71	22		23.6559	91.2815	20.9524	92.4468	0.574687	0.215935	0.149374	0.768403		913	79
	BIOHIT	R=6.5 / Pg1=45	124	0.11866		895	106	26	18		40.9091	89.4106	14.5161	97.177	0.651598	0.365771	0.303197	0.600323		898	107	23	17		42.5	89.3532	13.7097	97.5027	0.659266	0.379751	0.318532	0.584774		855	97	66	27		29.0323	89.8109	21.7742	92.8339	0.594216	0.260741	0.188432	0.716955		896	96
	BIOHIT	R=6.5 / Pg1=50	138	0.132057		882	119	25	19		43.1818	88.1119	13.7681	97.2437	0.656469	0.380483	0.312937	0.580485		885	120	22	18		45	88.0597	13.0435	97.5744	0.665299	0.396269	0.330597	0.562812		842	110	65	28		30.1075	88.4454	20.2899	92.8335	0.592765	0.266287	0.185529	0.708411		883	109
	BIOHIT	R=6.5 / Pg1=55	157	0.150239		863	138	25	19		43.1818	86.2138	12.1019	97.1847	0.646978	0.372287	0.293956	0.584668		866	139	22	18		45	86.1692	11.465	97.5225	0.655846	0.387761	0.311692	0.567124		824	128	64	29		31.1828	86.5546	18.4713	92.7928	0.588687	0.269902	0.177374	0.701184		865	127
	BIOHIT	R=6.5 / Pg1=60	179	0.171292		842	159	24	20		45.4545	84.1159	11.1732	97.2286	0.647852	0.382345	0.295704	0.568112		845	160	21	19		47.5	84.0796	10.6145	97.5751	0.657898	0.399378	0.315796	0.548608		806	146	60	33		35.4839	84.6639	18.4358	93.0716	0.600739	0.30042	0.201477	0.663139		844	148
	BIOHIT	R=6.5 / Pg1=65	198	0.189474		826	175	21	23		52.2727	82.5175	11.6162	97.5207	0.673951	0.431341	0.347902	0.508284		829	176	18	22		55	82.4876	11.1111	97.8749	0.687438	0.453682	0.374876	0.482875		791	161	56	37		39.7849	83.0882	18.6869	93.3884	0.614366	0.330566	0.228732	0.625449		827	165
	BIOHIT	R=6.5 / Pg1=70	211	0.201914		813	188	21	23		52.2727	81.2188	10.9005	97.482	0.667458	0.424553	0.334915	0.512896		816	189	18	22		55	81.194	10.4265	97.8417	0.68097	0.446567	0.36194	0.487716		778	174	56	37		39.7849	81.7227	17.5355	93.2854	0.607538	0.325133	0.215076	0.629278		815	177
	BIOHIT	R=6.5 / Pg1=75	241	0.230622		784	217	20	24		54.5455	78.3217	9.95851	97.5124	0.664336	0.427209	0.328671	0.503594		786	219	18	22		55	78.209	9.12863	97.7612	0.666045	0.430149	0.33209	0.499985		753	199	51	42		45.1613	79.0966	17.4274	93.6567	0.62129	0.357211	0.242579	0.586876		786	206
	BIOHIT	R=6.5 / Pg1=80	260	0.248804		766	235	19	25		56.8182	76.5235	9.61538	97.5796	0.666708	0.434792	0.333417	0.49151		767	238	18	22		55	76.3184	8.46154	97.707	0.656592	0.419751	0.313184	0.508509		736	216	49	44		47.3118	77.3109	16.9231	93.758	0.623114	0.365772	0.246228	0.573658		768	224
	BIOHIT	R=6.5 / Pg1=85	277	0.265072		751	250	17	27		61.3636	75.025	9.74729	97.7865	0.681943	0.460381	0.363886	0.460057		752	253	16	24		60	74.8259	8.66426	97.9167	0.674129	0.448955	0.348259	0.472624		721	231	47	46		49.4624	75.7353	16.6065	93.8802	0.625988	0.374605	0.251977	0.560609		752	240
	BIOHIT	R=6.5 / Pg1=90	299	0.286124		730	271	16	28		63.6364	72.9271	9.36455	97.8552	0.682817	0.464081	0.365634	0.453349		730	275	16	24		60	72.6368	8.02676	97.8552	0.663184	0.435821	0.326368	0.484638		702	250	44	49		52.6882	73.7395	16.388	94.1019	0.632138	0.38852	0.264277	0.541112		731	261
	BIOHIT	R=6.5 / Pg1=95	317	0.303349		713	288	15	29		65.9091	71.2288	9.14826	97.9396	0.685689	0.469462	0.371379	0.446091		713	292	15	25		62.5	70.9453	7.88644	97.9396	0.667226	0.443408	0.334453	0.474387		685	267	43	50		53.7634	71.9538	15.7729	94.0934	0.628586	0.386848	0.257172	0.540778		714	278
	BIOHIT	R=6.5 / Pg1=100	327	0.312919		703	298	15	29		65.9091	70.2298	8.8685	97.9109	0.680694	0.462878	0.361389	0.452599		703	302	15	25		62.5	69.9502	7.64526	97.9109	0.662251	0.437189	0.324502	0.480545		676	276	42	51		54.8387	71.0084	15.5963	94.1504	0.629236	0.389401	0.258471	0.536661		704	288
	BIOHIT	R=6.5 / Pg1=105	332	0.317703		698	303	15	29		65.9091	69.7303	8.73494	97.8962	0.678197	0.459586	0.356394	0.4559		698	307	15	25		62.5	69.4527	7.53012	97.8962	0.659764	0.43408	0.319527	0.483672		672	280	41	52		55.914	70.5882	15.6627	94.2496	0.632511	0.394687	0.265022	0.529965		699	293
	BIOHIT	R=6.5 / Pg1=110	350	0.334928		681	320	14	30		68.1818	68.032	8.57143	97.9856	0.681069	0.463854	0.362138	0.451038		681	324	14	26		65	67.7612	7.42857	97.9856	0.663806	0.440448	0.327612	0.475851		656	296	39	54		58.0645	68.9076	15.4286	94.3885	0.63486	0.400108	0.269721	0.522046		682	310
	BIOHIT	R=6.5 / Pg1=115	360	0.344498		671	330	14	30		68.1818	67.033	8.33333	97.9562	0.676074	0.457043	0.352148	0.458173		671	334	14	26		65	66.7662	7.22222	97.9562	0.658831	0.43398	0.317662	0.482648		646	306	39	54		58.0645	67.8571	15	94.3066	0.629608	0.394009	0.259217	0.52837		672	320
	BIOHIT	R=6.5 / Pg1=120	366	0.350239		665	336	14	30		68.1818	66.4336	8.19672	97.9381	0.673077	0.452956	0.346154	0.462504		665	340	14	26		65	66.1692	7.10383	97.9381	0.655846	0.4301	0.311692	0.486778		640	312	39	54		58.0645	67.2269	14.7541	94.2563	0.626457	0.39035	0.252914	0.532228		666	326
	BIOHIT	R=6.5 / Pg1=125	371	0.355024		660	341	14	30		68.1818	65.9341	8.08625	97.9228	0.670579	0.44955	0.341159	0.466142		660	345	14	26		65	65.6716	7.00809	97.9228	0.653358	0.426866	0.306716	0.490249		635	317	39	54		58.0645	66.7017	14.5553	94.2136	0.623831	0.3873	0.247662	0.535478		661	331
	BIOHIT	R=6.5 / Pg1=130	375	0.358852		656	345	14	30		68.1818	65.5345	8	97.9104	0.668581	0.446826	0.337163	0.46907		656	349	14	26		65	65.2736	6.93333	97.9104	0.651368	0.424279	0.302736	0.493044		631	321	39	54		58.0645	66.2815	14.4	94.1791	0.62173	0.38486	0.24346	0.5381		658	334
	BIOHIT	R=6.5 / Pg1=135	380	0.363636		652	349	13	31		70.4545	65.1349	8.15789	98.0451	0.677947	0.458905	0.355894	0.457002		652	353	13	27		67.5	64.8756	7.10526	98.0451	0.661878	0.43791	0.323756	0.478537		628	324	37	56		60.2151	65.9664	14.7368	94.4361	0.630907	0.397217	0.261814	0.523558		654	338
	BIOHIT	R=6.5 / Pg1=140	383	0.366507		649	352	13	31		70.4545	64.8352	8.09399	98.0363	0.676449	0.456793	0.352897	0.459293		649	356	13	27		67.5	64.5771	7.04961	98.0363	0.660386	0.435896	0.320771	0.480732		625	327	37	56		60.2151	65.6513	14.6214	94.4109	0.629332	0.395319	0.258663	0.525612		651	341
	BIOHIT	R=6.5 / Pg1=145	386	0.369378		646	355	13	31		70.4545	64.5355	8.03109	98.0273	0.67495	0.454682	0.3499	0.461592		646	359	13	27		67.5	64.2786	6.99482	98.0273	0.658893	0.433881	0.317786	0.482936		622	330	37	56		60.2151	65.3361	14.5078	94.3854	0.627756	0.393422	0.255512	0.527677		648	344
	BIOHIT	R=6.5 / Pg1=150	388	0.371292		644	357	13	31		70.4545	64.3357	7.98969	98.0213	0.673951	0.453274	0.347902	0.463128		644	361	13	27		67.5	64.0796	6.95876	98.0213	0.657898	0.432537	0.315796	0.484409		621	331	36	57		61.2903	65.2311	14.6907	94.5205	0.632607	0.399803	0.265214	0.520319		646	346
	BIOHIT	R=7 / Pg1=0	2	0.00191388		1000	1	43	1		2.27273	99.9001	50	95.8773	0.510864	0.0227046	0.0217283	0.977273		1004	1	39	1		2.5	99.9005	50	96.2608	0.512002	0.0249751	0.024005	0.975001		951	1	92	1		1.07527	99.895	50	91.1793	0.504851	0.0107414	0.00970227	0.989248		992	0
	BIOHIT	R=7 / Pg1=5	12	0.0114833		995	6	38	6		13.6364	99.4006	50	96.3214	0.565185	0.135546	0.13037	0.863657		998	7	35	5		12.5	99.3035	41.6667	96.6118	0.559017	0.124129	0.118035	0.875028		946	6	87	6		6.45161	99.3697	50	91.5779	0.529107	0.0641095	0.0582136	0.935505		988	4
	BIOHIT	R=7 / Pg1=10	30	0.0287081		978	23	37	7		15.9091	97.7023	23.3333	96.3547	0.568057	0.155435	0.136114	0.841223		981	24	34	6		15	97.6119	20	96.6502	0.56306	0.146418	0.126119	0.850335		930	22	85	8		8.60215	97.6891	26.6667	91.6256	0.531456	0.0840336	0.0629123	0.914271		976	16
	BIOHIT	R=7 / Pg1=15	42	0.0401914		969	32	34	10		22.7273	96.8032	23.8095	96.6102	0.597652	0.220007	0.195305	0.773388		972	33	31	9		22.5	96.7164	21.4286	96.9093	0.596082	0.217612	0.192164	0.775695		922	30	81	12		12.9032	96.8487	28.5714	91.9242	0.54876	0.124966	0.0975197	0.871538		969	23
	BIOHIT	R=7 / Pg1=20	54	0.0516746		958	43	33	11		25	95.7043	20.3704	96.67	0.603521	0.239261	0.207043	0.751229		961	44	30	10		25	95.6219	18.5185	96.9728	0.603109	0.239055	0.206219	0.751277		911	41	80	13		13.9785	95.6933	24.0741	91.9273	0.548359	0.133765	0.0967177	0.861292		959	33
	BIOHIT	R=7 / Pg1=25	63	0.0602871		950	51	32	12		27.2727	94.9051	19.0476	96.7413	0.610889	0.258832	0.221778	0.729055		953	52	29	11		27.5	94.8259	17.4603	97.0468	0.611629	0.260771	0.223259	0.726844		903	49	79	14		15.0538	94.8529	22.2222	91.9552	0.549534	0.142789	0.099067	0.85102		951	41
	BIOHIT	R=7 / Pg1=30	76	0.0727273		939	62	30	14		31.8182	93.8062	18.4211	96.904	0.628122	0.298474	0.256244	0.684626		942	63	27	13		32.5	93.7313	17.1053	97.2136	0.631157	0.304627	0.262313	0.677905		894	58	75	18		19.3548	93.9076	23.6842	92.2601	0.566312	0.181757	0.132624	0.80875		940	52
	BIOHIT	R=7 / Pg1=35	92	0.0880383		925	76	28	16		36.3636	92.4076	17.3913	97.0619	0.643856	0.336028	0.287712	0.640877		928	77	25	15		37.5	92.3383	16.3043	97.3767	0.649192	0.346269	0.298383	0.629679		881	71	72	21		22.5806	92.542	22.8261	92.4449	0.575613	0.208966	0.151227	0.777777		926	66
	BIOHIT	R=7 / Pg1=40	108	0.103349		910	91	27	17		38.6364	90.9091	15.7407	97.1185	0.647727	0.35124	0.295455	0.620334		913	92	24	16		40	90.8458	14.8148	97.4386	0.654229	0.363383	0.308458	0.606943		867	85	70	23		24.7312	91.0714	21.2963	92.5293	0.579013	0.22523	0.158026	0.757965		911	81
	BIOHIT	R=7 / Pg1=45	128	0.122488		892	109	25	19		43.1818	89.1109	14.8438	97.2737	0.661464	0.384797	0.322927	0.578522		895	110	22	18		45	89.0547	14.0625	97.6009	0.670274	0.400746	0.340547	0.560785		852	100	65	28		30.1075	89.4958	21.875	92.9117	0.598017	0.26945	0.196033	0.706774		893	99
	BIOHIT	R=7 / Pg1=50	143	0.136842		878	123	24	20		45.4545	87.7123	13.986	97.3392	0.665834	0.398692	0.331668	0.559124		881	124	21	19		47.5	87.6617	13.2867	97.6718	0.675808	0.416393	0.351617	0.539304		838	114	64	29		31.1828	88.0252	20.2797	92.9047	0.59604	0.274487	0.19208	0.698513		879	113
	BIOHIT	R=7 / Pg1=55	163	0.155981		859	142	23	21		47.7273	85.8142	12.8834	97.3923	0.667707	0.409568	0.335415	0.541634		862	143	20	20		50	85.7711	12.2699	97.7324	0.678856	0.428856	0.357711	0.519852		820	132	62	31		33.3333	86.1345	19.0184	92.9705	0.597339	0.287115	0.194678	0.680933		861	131
	BIOHIT	R=7 / Pg1=60	190	0.181818		834	167	21	23		52.2727	83.3167	12.1053	97.5439	0.677947	0.435519	0.355894	0.505591		837	168	18	22		55	83.2836	11.5789	97.8947	0.691418	0.45806	0.382836	0.480046		798	154	57	36		38.7097	83.8235	18.9474	93.3333	0.612666	0.324478	0.225332	0.633891		835	157
	BIOHIT	R=7 / Pg1=65	212	0.202871		815	186	18	26		59.0909	81.4186	12.2642	97.8391	0.702547	0.48111	0.405095	0.449313		818	187	15	25		62.5	81.393	11.7925	98.1993	0.719465	0.508706	0.43893	0.418625		780	172	53	40		43.0108	81.9328	18.8679	93.6375	0.624718	0.352399	0.249435	0.597846		815	177
	BIOHIT	R=7 / Pg1=70	228	0.218182		799	202	18	26		59.0909	79.8202	11.4035	97.7968	0.694555	0.471665	0.389111	0.456156		802	203	15	25		62.5	79.801	10.9649	98.164	0.711505	0.498756	0.42301	0.42594		764	188	53	40		43.0108	80.2521	17.5439	93.5129	0.616314	0.34517	0.232629	0.603138		800	192
	BIOHIT	R=7 / Pg1=75	265	0.253589		763	238	17	27		61.3636	76.2238	10.1887	97.8205	0.687937	0.467737	0.375874	0.45366		765	240	15	25		62.5	76.1194	9.43396	98.0769	0.693097	0.475746	0.386194	0.444582		733	219	47	46		49.4624	76.9958	17.3585	93.9744	0.632291	0.380839	0.264582	0.55527		764	228
	BIOHIT	R=7 / Pg1=80	291	0.278469		738	263	16	28		63.6364	73.7263	9.62199	97.878	0.686813	0.469167	0.373626	0.448623		739	266	15	25		62.5	73.5323	8.59107	98.0106	0.680162	0.459577	0.360323	0.458998		710	242	44	49		52.6882	74.5798	16.8385	94.1645	0.63634	0.392948	0.27268	0.537084		739	253
	BIOHIT	R=7 / Pg1=85	309	0.295694		722	279	14	30		68.1818	72.1279	9.70874	98.0978	0.701548	0.491781	0.403097	0.422996		723	282	13	27		67.5	71.9403	8.73786	98.2337	0.697202	0.485597	0.394403	0.429371		694	258	42	51		54.8387	72.8992	16.5049	94.2935	0.638689	0.39977	0.277379	0.526688		722	270
	BIOHIT	R=7 / Pg1=90	335	0.320574		697	304	13	31		70.4545	69.6304	9.25373	98.169	0.700425	0.490578	0.400849	0.423704		697	308	13	27		67.5	69.3532	8.0597	98.169	0.684266	0.468134	0.368532	0.446707		671	281	39	54		58.0645	70.4832	16.1194	94.507	0.642739	0.409257	0.285477	0.512818		697	295
	BIOHIT	R=7 / Pg1=95	354	0.338756		679	322	12	32		72.7273	67.8322	9.03955	98.2634	0.702797	0.493325	0.405594	0.421731		679	326	12	28		70	67.5622	7.9096	98.2634	0.687811	0.472935	0.375622	0.441838		653	299	38	55		59.1398	68.5924	15.5367	94.5007	0.638661	0.405654	0.277322	0.515363		679	313
	BIOHIT	R=7 / Pg1=100	367	0.351196		667	334	11	33		75	66.6334	8.99183	98.3776	0.708167	0.49975	0.416334	0.416933		667	338	11	29		72.5	66.3682	7.90191	98.3776	0.694341	0.481169	0.388682	0.434436		642	310	36	57		61.2903	67.437	15.5313	94.6903	0.643636	0.413323	0.287273	0.505845		666	326
	BIOHIT	R=7 / Pg1=105	374	0.357895		661	340	10	34		77.2727	66.034	9.09091	98.5097	0.716533	0.510262	0.433067	0.408683		661	344	10	30		75	65.7711	8.02139	98.5097	0.703856	0.493284	0.407711	0.423865		637	315	34	59		63.4409	66.9118	15.7754	94.9329	0.651763	0.424494	0.303526	0.493092		660	332
	BIOHIT	R=7 / Pg1=110	393	0.376077		643	358	9	35		79.5455	64.2358	8.90585	98.6196	0.718906	0.510966	0.437812	0.412004		643	362	9	31		77.5	63.9801	7.88804	98.6196	0.7074	0.495846	0.414801	0.424698		620	332	32	61		65.5914	65.1261	15.5216	95.092	0.653587	0.427171	0.307174	0.489913		642	350
	BIOHIT	R=7 / Pg1=115	406	0.388517		630	371	9	35		79.5455	62.9371	8.62069	98.5915	0.712413	0.500636	0.424825	0.423326		630	375	9	31		77.5	62.6866	7.63547	98.5915	0.700933	0.485821	0.401866	0.435723		607	345	32	61		65.5914	63.7605	15.0246	94.9922	0.646759	0.418214	0.293519	0.499725		629	363
	BIOHIT	R=7 / Pg1=120	412	0.394258		624	377	9	35		79.5455	62.3377	8.49515	98.5782	0.709416	0.495868	0.418831	0.428584		624	381	9	31		77.5	62.0896	7.52427	98.5782	0.697948	0.481194	0.395896	0.440846		601	351	32	61		65.5914	63.1303	14.8058	94.9447	0.643608	0.41408	0.287216	0.504314		623	369
	BIOHIT	R=7 / Pg1=125	417	0.399043		619	382	9	35		79.5455	61.8382	8.39329	98.5669	0.706918	0.491894	0.413836	0.43298		619	386	9	31		77.5	61.592	7.43405	98.5669	0.69546	0.477338	0.39092	0.445132		596	356	32	61		65.5914	62.605	14.6283	94.9045	0.640982	0.410635	0.281964	0.508167		618	374
	BIOHIT	R=7 / Pg1=130	421	0.402871		615	386	9	35		79.5455	61.4386	8.31354	98.5577	0.70492	0.488716	0.40984	0.436506		615	390	9	31		77.5	61.194	7.36342	98.5577	0.69347	0.474254	0.38694	0.44857		592	360	32	61		65.5914	62.1849	14.4893	94.8718	0.638881	0.407879	0.277763	0.511267		615	377
	BIOHIT	R=7 / Pg1=135	428	0.409569		609	392	8	36		81.8182	60.8392	8.41121	98.7034	0.713287	0.497775	0.426573	0.431758		609	396	8	32		80	60.597	7.47664	98.7034	0.702985	0.484776	0.40597	0.441882		588	364	29	64		68.8172	61.7647	14.9533	95.2998	0.65291	0.425047	0.305819	0.493387		609	383
	BIOHIT	R=7 / Pg1=140	431	0.41244		606	395	8	36		81.8182	60.5395	8.35267	98.6971	0.711788	0.495323	0.423576	0.434478		606	399	8	32		80	60.2985	7.42459	98.6971	0.701493	0.482388	0.402985	0.444546		585	367	29	64		68.8172	61.4496	14.8492	95.2769	0.651334	0.422879	0.302668	0.495833		606	386
	BIOHIT	R=7 / Pg1=145	435	0.416268		602	399	8	36		81.8182	60.1399	8.27586	98.6885	0.70979	0.492053	0.41958	0.438111		602	403	8	32		80	59.9005	7.35632	98.6885	0.699502	0.479204	0.399005	0.448104		581	371	29	64		68.8172	61.0294	14.7126	95.2459	0.649233	0.419987	0.298466	0.499107		602	390
	BIOHIT	R=7 / Pg1=150	438	0.419139		599	402	8	36		81.8182	59.8402	8.21918	98.682	0.708292	0.489601	0.416583	0.440839		599	406	8	32		80	59.602	7.30594	98.682	0.69801	0.476816	0.39602	0.450777		579	373	28	65		69.8925	60.8193	14.8402	95.3871	0.653559	0.425081	0.307118	0.494124		599	393
	BIOHIT	R=7.5 / Pg1=0	2	0.00191388		1000	1	43	1		2.27273	99.9001	50	95.8773	0.510864	0.0227046	0.0217283	0.977273		1004	1	39	1		2.5	99.9005	50	96.2608	0.512002	0.0249751	0.024005	0.975001		951	1	92	1		1.07527	99.895	50	91.1793	0.504851	0.0107414	0.00970227	0.989248		992	0
	BIOHIT	R=7.5 / Pg1=5	12	0.0114833		995	6	38	6		13.6364	99.4006	50	96.3214	0.565185	0.135546	0.13037	0.863657		998	7	35	5		12.5	99.3035	41.6667	96.6118	0.559017	0.124129	0.118035	0.875028		946	6	87	6		6.45161	99.3697	50	91.5779	0.529107	0.0641095	0.0582136	0.935505		988	4
	BIOHIT	R=7.5 / Pg1=10	30	0.0287081		978	23	37	7		15.9091	97.7023	23.3333	96.3547	0.568057	0.155435	0.136114	0.841223		981	24	34	6		15	97.6119	20	96.6502	0.56306	0.146418	0.126119	0.850335		930	22	85	8		8.60215	97.6891	26.6667	91.6256	0.531456	0.0840336	0.0629123	0.914271		976	16
	BIOHIT	R=7.5 / Pg1=15	42	0.0401914		969	32	34	10		22.7273	96.8032	23.8095	96.6102	0.597652	0.220007	0.195305	0.773388		972	33	31	9		22.5	96.7164	21.4286	96.9093	0.596082	0.217612	0.192164	0.775695		922	30	81	12		12.9032	96.8487	28.5714	91.9242	0.54876	0.124966	0.0975197	0.871538		969	23
	BIOHIT	R=7.5 / Pg1=20	54	0.0516746		958	43	33	11		25	95.7043	20.3704	96.67	0.603521	0.239261	0.207043	0.751229		961	44	30	10		25	95.6219	18.5185	96.9728	0.603109	0.239055	0.206219	0.751277		911	41	80	13		13.9785	95.6933	24.0741	91.9273	0.548359	0.133765	0.0967177	0.861292		959	33
	BIOHIT	R=7.5 / Pg1=25	63	0.0602871		950	51	32	12		27.2727	94.9051	19.0476	96.7413	0.610889	0.258832	0.221778	0.729055		953	52	29	11		27.5	94.8259	17.4603	97.0468	0.611629	0.260771	0.223259	0.726844		903	49	79	14		15.0538	94.8529	22.2222	91.9552	0.549534	0.142789	0.099067	0.85102		951	41
	BIOHIT	R=7.5 / Pg1=30	77	0.0736842		938	63	30	14		31.8182	93.7063	18.1818	96.9008	0.627622	0.298156	0.255245	0.684717		941	64	27	13		32.5	93.6318	16.8831	97.2107	0.630659	0.304303	0.261318	0.677997		893	59	75	18		19.3548	93.8025	23.3766	92.2521	0.565787	0.181553	0.131574	0.808829		939	53
	BIOHIT	R=7.5 / Pg1=35	94	0.0899522		923	78	28	16		36.3636	92.2078	17.0213	97.0557	0.642857	0.335301	0.285714	0.641117		926	79	25	15		37.5	92.1393	15.9574	97.3712	0.648197	0.345522	0.296393	0.629924		879	73	72	21		22.5806	92.3319	22.3404	92.429	0.574563	0.208491	0.149126	0.777982		924	68
	BIOHIT	R=7.5 / Pg1=40	114	0.109091		904	97	27	17		38.6364	90.3097	14.9123	97.0999	0.64473	0.348924	0.289461	0.621241		907	98	24	16		40	90.2488	14.0351	97.4221	0.651244	0.360995	0.302488	0.607872		861	91	70	23		24.7312	90.4412	20.1754	92.4812	0.575862	0.223672	0.151724	0.758734		905	87
	BIOHIT	R=7.5 / Pg1=45	136	0.130144		884	117	25	19		43.1818	88.3117	13.9706	97.2497	0.657468	0.381346	0.314935	0.58008		887	118	22	18		45	88.2587	13.2353	97.5798	0.666294	0.397164	0.332587	0.562393		844	108	65	28		30.1075	88.6555	20.5882	92.8493	0.593815	0.26692	0.18763	0.708072		885	107
	BIOHIT	R=7.5 / Pg1=50	153	0.146411		868	133	24	20		45.4545	86.7133	13.0719	97.3094	0.660839	0.394151	0.321678	0.561404		871	134	21	19		47.5	86.6667	12.4183	97.6457	0.670833	0.411667	0.341667	0.541667		828	124	64	29		31.1828	86.9748	18.9542	92.8251	0.590788	0.271212	0.181576	0.70039		869	123
	BIOHIT	R=7.5 / Pg1=55	178	0.170335		844	157	23	21		47.7273	84.3157	11.7978	97.3472	0.660215	0.402416	0.32043	0.54575		847	158	20	20		50	84.2786	11.236	97.6932	0.671393	0.421393	0.342786	0.524134		805	147	62	31		33.3333	84.5588	17.4157	92.8489	0.589461	0.281863	0.178922	0.684315		846	146
	BIOHIT	R=7.5 / Pg1=60	209	0.2		815	186	21	23		52.2727	81.4186	11.0048	97.488	0.668457	0.425597	0.336913	0.512168		818	187	18	22		55	81.393	10.5263	97.8469	0.681965	0.447662	0.36393	0.486952		779	173	57	36		38.7097	81.8277	17.2249	93.1818	0.602687	0.316753	0.205374	0.639276		816	176
	BIOHIT	R=7.5 / Pg1=65	236	0.225837		791	210	18	26		59.0909	79.021	11.0169	97.775	0.690559	0.466942	0.381119	0.459747		794	211	15	25		62.5	79.005	10.5932	98.1459	0.707525	0.493781	0.41505	0.429772		756	196	53	40		43.0108	79.4118	16.9492	93.4487	0.612113	0.341556	0.224225	0.605941		791	201
	BIOHIT	R=7.5 / Pg1=70	257	0.245933		770	231	18	26		59.0909	76.9231	10.1167	97.7157	0.68007	0.454545	0.36014	0.469691		773	232	15	25		62.5	76.9154	9.72763	98.0964	0.697077	0.480721	0.394154	0.440358		737	215	51	42		45.1613	77.416	16.3424	93.5279	0.612886	0.34962	0.225773	0.59307		771	221
	BIOHIT	R=7.5 / Pg1=75	300	0.287081		728	273	17	27		61.3636	72.7273	9	97.7181	0.670455	0.446281	0.340909	0.472924		730	275	15	25		62.5	72.6368	8.33333	97.9866	0.675684	0.45398	0.351368	0.464219		700	252	45	48		51.6129	73.5294	16	93.9597	0.625712	0.379507	0.251423	0.551544		729	263
	BIOHIT	R=7.5 / Pg1=80	328	0.313876		701	300	16	28		63.6364	70.03	8.53659	97.7685	0.668332	0.445645	0.336663	0.471224		702	303	15	25		62.5	69.8507	7.62195	97.9079	0.661754	0.436567	0.323507	0.481168		676	276	41	52		55.914	71.0084	15.8537	94.2817	0.634612	0.397036	0.269224	0.527645		702	290
	BIOHIT	R=7.5 / Pg1=85	348	0.333014		683	318	14	30		68.1818	68.2318	8.62069	97.9914	0.682068	0.465217	0.364136	0.449624		684	321	13	27		67.5	68.0597	7.75862	98.1349	0.677799	0.459403	0.355597	0.455679		658	294	39	54		58.0645	69.1176	15.5172	94.4046	0.635911	0.401328	0.271822	0.520798		683	309
	BIOHIT	R=7.5 / Pg1=90	377	0.360766		655	346	13	31		70.4545	65.4346	8.22281	98.0539	0.679446	0.461016	0.358891	0.45472		655	350	13	27		67.5	65.1741	7.1618	98.0539	0.663371	0.439925	0.326741	0.47635		632	320	36	57		61.2903	66.3866	15.1194	94.6108	0.638384	0.406885	0.276769	0.51267		655	337
	BIOHIT	R=7.5 / Pg1=95	396	0.378947		637	364	12	32		72.7273	63.6364	8.08081	98.151	0.681818	0.46281	0.363636	0.454545		637	368	12	28		70	63.3831	7.07071	98.151	0.666915	0.443682	0.333831	0.473371		614	338	35	58		62.3656	64.4958	14.6465	94.6071	0.634307	0.402232	0.268614	0.517387		637	355
	BIOHIT	R=7.5 / Pg1=100	415	0.397129		619	382	11	33		75	61.8382	7.95181	98.254	0.684191	0.463786	0.368382	0.456216		619	386	11	29		72.5	61.592	6.98795	98.254	0.67046	0.446542	0.34092	0.472379		597	355	33	60		64.5161	62.7101	14.4578	94.7619	0.636131	0.404581	0.272262	0.514747		618	374
	BIOHIT	R=7.5 / Pg1=105	426	0.407656		609	392	10	34		77.2727	60.8392	7.98122	98.3845	0.690559	0.470121	0.381119	0.45278		609	396	10	30		75	60.597	7.04225	98.3845	0.677985	0.454478	0.35597	0.466647		588	364	31	62		66.6667	61.7647	14.554	94.9919	0.642157	0.411765	0.284314	0.507252		608	384
	BIOHIT	R=7.5 / Pg1=110	448	0.428708		588	413	9	35		79.5455	58.7413	7.8125	98.4925	0.691434	0.46726	0.382867	0.460508		588	417	9	31		77.5	58.5075	6.91964	98.4925	0.680037	0.453433	0.360075	0.472004		569	383	28	65		69.8925	59.7689	14.5089	95.3099	0.648307	0.41774	0.296614	0.502494		588	404
	BIOHIT	R=7.5 / Pg1=115	462	0.442105		574	427	9	35		79.5455	57.3427	7.57576	98.4563	0.684441	0.456135	0.368881	0.473079		574	431	9	31		77.5	57.1144	6.70996	98.4563	0.673072	0.442637	0.346144	0.484296		555	397	28	65		69.8925	58.2983	14.0693	95.1973	0.640954	0.407461	0.281908	0.514344		574	418
	BIOHIT	R=7.5 / Pg1=120	469	0.448804		567	434	9	35		79.5455	56.6434	7.46269	98.4375	0.680944	0.450572	0.361888	0.479394		567	438	9	31		77.5	56.4179	6.60981	98.4375	0.66959	0.437239	0.339179	0.490474		548	404	28	65		69.8925	57.563	13.8593	95.1389	0.637277	0.402322	0.274555	0.520323		567	425
	BIOHIT	R=7.5 / Pg1=125	476	0.455502		560	441	9	35		79.5455	55.9441	7.35294	98.4183	0.677448	0.44501	0.354895	0.485728		560	445	9	31		77.5	55.7214	6.51261	98.4183	0.666107	0.431841	0.332214	0.496673		541	411	28	65		69.8925	56.8277	13.6555	95.0791	0.633601	0.397183	0.267202	0.526337		560	432
	BIOHIT	R=7.5 / Pg1=130	481	0.460287		555	446	9	35		79.5455	55.4446	7.27651	98.4043	0.67495	0.441036	0.3499	0.490263		555	450	9	31		77.5	55.2239	6.44491	98.4043	0.663619	0.427985	0.327239	0.501114		536	416	28	65		69.8925	56.3025	13.5135	95.0355	0.630975	0.393512	0.26195	0.530654		556	436
	BIOHIT	R=7.5 / Pg1=135	489	0.467943		548	453	8	36		81.8182	54.7453	7.36196	98.5612	0.682817	0.447916	0.365634	0.487706		548	457	8	32		80	54.5274	6.54397	98.5612	0.672637	0.436219	0.345274	0.496766		531	421	25	68		73.1183	55.7773	13.9059	95.5036	0.644478	0.407834	0.288956	0.51752		549	443
	BIOHIT	R=7.5 / Pg1=140	492	0.470813		545	456	8	36		81.8182	54.4456	7.31707	98.5533	0.681319	0.445464	0.362637	0.490488		545	460	8	32		80	54.2289	6.50407	98.5533	0.671144	0.433831	0.342289	0.4995		528	424	25	68		73.1183	55.4622	13.8211	95.4792	0.642902	0.40553	0.285805	0.520216		546	446
	BIOHIT	R=7.5 / Pg1=145	496	0.474641		541	460	8	36		81.8182	54.046	7.25806	98.5428	0.679321	0.442194	0.358641	0.494202		541	464	8	32		80	53.8308	6.45161	98.5428	0.669154	0.430647	0.338308	0.503149		524	428	25	68		73.1183	55.042	13.7097	95.4463	0.640801	0.402458	0.281603	0.523817		542	450
	BIOHIT	R=7.5 / Pg1=150	499	0.477512		538	463	8	36		81.8182	53.7463	7.21443	98.5348	0.677822	0.439742	0.355644	0.49699		538	467	8	32		80	53.5323	6.41283	98.5348	0.667662	0.428259	0.335323	0.50589		522	430	24	69		74.1935	54.8319	13.8277	95.6044	0.645127	0.406818	0.290255	0.520205		539	453
	BIOHIT	R=8 / Pg1=0	2	0.00191388		1000	1	43	1		2.27273	99.9001	50	95.8773	0.510864	0.0227046	0.0217283	0.977273		1004	1	39	1		2.5	99.9005	50	96.2608	0.512002	0.0249751	0.024005	0.975001		951	1	92	1		1.07527	99.895	50	91.1793	0.504851	0.0107414	0.00970227	0.989248		992	0
	BIOHIT	R=8 / Pg1=5	12	0.0114833		995	6	38	6		13.6364	99.4006	50	96.3214	0.565185	0.135546	0.13037	0.863657		998	7	35	5		12.5	99.3035	41.6667	96.6118	0.559017	0.124129	0.118035	0.875028		946	6	87	6		6.45161	99.3697	50	91.5779	0.529107	0.0641095	0.0582136	0.935505		988	4
	BIOHIT	R=8 / Pg1=10	30	0.0287081		978	23	37	7		15.9091	97.7023	23.3333	96.3547	0.568057	0.155435	0.136114	0.841223		981	24	34	6		15	97.6119	20	96.6502	0.56306	0.146418	0.126119	0.850335		930	22	85	8		8.60215	97.6891	26.6667	91.6256	0.531456	0.0840336	0.0629123	0.914271		976	16
	BIOHIT	R=8 / Pg1=15	42	0.0401914		969	32	34	10		22.7273	96.8032	23.8095	96.6102	0.597652	0.220007	0.195305	0.773388		972	33	31	9		22.5	96.7164	21.4286	96.9093	0.596082	0.217612	0.192164	0.775695		922	30	81	12		12.9032	96.8487	28.5714	91.9242	0.54876	0.124966	0.0975197	0.871538		969	23
	BIOHIT	R=8 / Pg1=20	54	0.0516746		958	43	33	11		25	95.7043	20.3704	96.67	0.603521	0.239261	0.207043	0.751229		961	44	30	10		25	95.6219	18.5185	96.9728	0.603109	0.239055	0.206219	0.751277		911	41	80	13		13.9785	95.6933	24.0741	91.9273	0.548359	0.133765	0.0967177	0.861292		959	33
	BIOHIT	R=8 / Pg1=25	63	0.0602871		950	51	32	12		27.2727	94.9051	19.0476	96.7413	0.610889	0.258832	0.221778	0.729055		953	52	29	11		27.5	94.8259	17.4603	97.0468	0.611629	0.260771	0.223259	0.726844		903	49	79	14		15.0538	94.8529	22.2222	91.9552	0.549534	0.142789	0.099067	0.85102		951	41
	BIOHIT	R=8 / Pg1=30	77	0.0736842		938	63	30	14		31.8182	93.7063	18.1818	96.9008	0.627622	0.298156	0.255245	0.684717		941	64	27	13		32.5	93.6318	16.8831	97.2107	0.630659	0.304303	0.261318	0.677997		893	59	75	18		19.3548	93.8025	23.3766	92.2521	0.565787	0.181553	0.131574	0.808829		939	53
	BIOHIT	R=8 / Pg1=35	95	0.0909091		922	79	28	16		36.3636	92.1079	16.8421	97.0526	0.642358	0.334938	0.284715	0.641239		925	80	25	15		37.5	92.0398	15.7895	97.3684	0.647699	0.345149	0.295398	0.630049		878	74	72	21		22.5806	92.2269	22.1053	92.4211	0.574038	0.208254	0.148075	0.778086		923	69
	BIOHIT	R=8 / Pg1=40	117	0.111962		901	100	27	17		38.6364	90.01	14.5299	97.0905	0.643232	0.347766	0.286464	0.621715		904	101	24	16		40	89.9502	13.6752	97.4138	0.649751	0.359801	0.299502	0.608358		858	94	70	23		24.7312	90.1261	19.6581	92.4569	0.574286	0.222892	0.148572	0.759137		902	90
	BIOHIT	R=8 / Pg1=45	140	0.133971		880	121	25	19		43.1818	87.9121	13.5714	97.2376	0.65547	0.37962	0.310939	0.580898		883	122	22	18		45	87.8607	12.8571	97.5691	0.664303	0.395373	0.328607	0.563237		840	112	65	28		30.1075	88.2353	20	92.8177	0.591714	0.265655	0.183428	0.708757		881	111
	BIOHIT	R=8 / Pg1=50	160	0.15311		861	140	24	20		45.4545	86.014	12.5	97.2881	0.657343	0.390973	0.314685	0.5631		864	141	21	19		47.5	85.9701	11.875	97.6271	0.667351	0.408358	0.334701	0.543423		821	131	64	29		31.1828	86.2395	18.125	92.7684	0.587111	0.268919	0.174223	0.701795		862	130
	BIOHIT	R=8 / Pg1=55	191	0.182775		831	170	23	21		47.7273	83.017	10.9948	97.3068	0.653721	0.396217	0.307443	0.549624		834	171	20	20		50	82.9851	10.4712	97.6581	0.664925	0.414925	0.329851	0.528158		792	160	62	31		33.3333	83.1933	16.2304	92.74	0.582633	0.277311	0.165266	0.687525		833	159
	BIOHIT	R=8 / Pg1=60	223	0.213397		801	200	21	23		52.2727	80.02	10.3139	97.4453	0.661464	0.418286	0.322927	0.517406		804	201	18	22		55	80	9.86547	97.8102	0.675	0.44	0.35	0.492443		765	187	57	36		38.7097	80.3571	16.1435	93.0657	0.595334	0.31106	0.190668	0.643611		802	190
	BIOHIT	R=8 / Pg1=65	255	0.244019		772	229	18	26		59.0909	77.1229	10.1961	97.7215	0.681069	0.455726	0.362138	0.468713		775	230	15	25		62.5	77.1144	9.80392	98.1013	0.698072	0.481965	0.396144	0.439318		737	215	53	40		43.0108	77.416	15.6863	93.2911	0.602134	0.332972	0.204267	0.61301		772	220
	BIOHIT	R=8 / Pg1=70	279	0.266986		748	253	18	26		59.0909	74.7253	9.319	97.6501	0.669081	0.441558	0.338162	0.480871		751	254	15	25		62.5	74.7264	8.96057	98.0418	0.686132	0.46704	0.372264	0.452217		715	237	51	42		45.1613	75.105	15.0538	93.342	0.601332	0.339184	0.202663	0.602249		749	243
	BIOHIT	R=8 / Pg1=75	327	0.312919		702	299	16	28		63.6364	70.1299	8.56269	97.7716	0.668831	0.446281	0.337662	0.470589		704	301	14	26		65	70.0498	7.95107	98.0501	0.675249	0.455323	0.350498	0.460654		674	278	44	49		52.6882	70.7983	14.9847	93.8719	0.617432	0.373023	0.234865	0.555981		702	290
	BIOHIT	R=8 / Pg1=80	360	0.344498		670	331	15	29		65.9091	66.9331	8.05556	97.8102	0.664211	0.44115	0.328422	0.474933		671	334	14	26		65	66.7662	7.22222	97.9562	0.658831	0.43398	0.317662	0.482648		645	307	40	53		56.9892	67.7521	14.7222	94.1606	0.623707	0.386114	0.247413	0.537573		670	322
	BIOHIT	R=8 / Pg1=85	386	0.369378		647	354	12	32		72.7273	64.6354	8.29016	98.1791	0.686813	0.470075	0.373626	0.446594		648	357	11	29		72.5	64.4776	7.51295	98.3308	0.684888	0.467463	0.369776	0.449232		622	330	37	56		60.2151	65.3361	14.5078	94.3854	0.627756	0.393422	0.255512	0.527677		645	347
	BIOHIT	R=8 / Pg1=90	417	0.399043		617	384	11	33		75	61.6384	7.91367	98.2484	0.683192	0.462288	0.366384	0.457888		617	388	11	29		72.5	61.393	6.95444	98.2484	0.669465	0.4451	0.33893	0.473999		594	358	34	59		63.4409	62.395	14.1487	94.586	0.629179	0.395839	0.258358	0.524472		615	377
	BIOHIT	R=8 / Pg1=95	442	0.422967		593	408	10	34		77.2727	59.2408	7.69231	98.3416	0.682567	0.45777	0.365135	0.466674		593	412	10	30		75	59.005	6.78733	98.3416	0.670025	0.442537	0.34005	0.480166		570	382	33	60		64.5161	59.8739	13.5747	94.5274	0.62195	0.386284	0.243901	0.53565		591	401
	BIOHIT	R=8 / Pg1=100	463	0.443062		573	428	9	35		79.5455	57.2428	7.5594	98.4536	0.683941	0.45534	0.367882	0.47398		573	432	9	31		77.5	57.0149	6.69546	98.4536	0.672575	0.441866	0.345149	0.485177		551	401	31	62		66.6667	57.8782	13.3909	94.6735	0.622724	0.385854	0.245448	0.537156		570	422
	BIOHIT	R=8 / Pg1=105	477	0.456459		560	441	8	36		81.8182	55.9441	7.54717	98.5915	0.688811	0.457724	0.377622	0.476603		560	445	8	32		80	55.7214	6.7086	98.5915	0.678607	0.445771	0.357214	0.48586		539	413	29	64		68.8172	56.6176	13.4172	94.8944	0.627174	0.389627	0.254349	0.534265		557	435
	BIOHIT	R=8 / Pg1=110	499	0.477512		539	462	7	37		84.0909	53.8462	7.41483	98.7179	0.689685	0.452797	0.379371	0.488188		539	466	7	33		82.5	53.6318	6.61323	98.7179	0.680659	0.442463	0.361318	0.495606		520	432	26	67		72.043	54.6218	13.4269	95.2381	0.633324	0.393512	0.266649	0.532989		537	455
	BIOHIT	R=8 / Pg1=115	516	0.49378		522	479	7	37		84.0909	52.1479	7.17054	98.6767	0.681194	0.438516	0.362388	0.504274		522	483	7	33		82.5	51.9403	6.39535	98.6767	0.672201	0.428507	0.344403	0.511467		503	449	26	67		72.043	52.8361	12.9845	95.0851	0.624396	0.380647	0.248791	0.548272		520	472
	BIOHIT	R=8 / Pg1=120	524	0.501435		514	487	7	37		84.0909	51.3487	7.06107	98.6564	0.677198	0.431795	0.354396	0.511865		514	491	7	33		82.5	51.1443	6.29771	98.6564	0.668221	0.42194	0.336443	0.518954		495	457	26	67		72.043	51.9958	12.7863	95.0096	0.620194	0.374593	0.240388	0.555517		512	480
	BIOHIT	R=8 / Pg1=125	535	0.511962		503	498	7	37		84.0909	50.2498	6.91589	98.6275	0.671703	0.422555	0.343407	0.52232		503	502	7	33		82.5	50.0498	6.16822	98.6275	0.662749	0.41291	0.325498	0.529271		484	468	26	67		72.043	50.8403	12.5234	94.902	0.614417	0.366269	0.228833	0.565532		501	491
	BIOHIT	R=8 / Pg1=130	541	0.517703		497	504	7	37		84.0909	49.6503	6.83919	98.6111	0.668706	0.417514	0.337413	0.528033		497	508	7	33		82.5	49.4527	6.09982	98.6111	0.659764	0.407985	0.319527	0.534909		478	474	26	67		72.043	50.2101	12.3845	94.8413	0.611265	0.361729	0.222531	0.571019		496	496
	BIOHIT	R=8 / Pg1=135	550	0.526316		489	512	6	38		86.3636	48.8511	6.90909	98.7879	0.676074	0.421896	0.352148	0.529354		489	516	6	34		85	48.6567	6.18182	98.7879	0.668284	0.413582	0.336567	0.534896		472	480	23	70		75.2688	49.5798	12.7273	95.3535	0.624243	0.373182	0.248486	0.561589		488	504
	BIOHIT	R=8 / Pg1=140	554	0.530144		485	516	6	38		86.3636	48.4515	6.85921	98.778	0.674076	0.418445	0.348152	0.533216		485	520	6	34		85	48.2587	6.13718	98.778	0.666294	0.410199	0.332587	0.538717		468	484	23	70		75.2688	49.1597	12.6354	95.3157	0.622142	0.370019	0.244285	0.565365		484	508
	BIOHIT	R=8 / Pg1=145	559	0.534928		480	521	6	38		86.3636	47.952	6.79785	98.7654	0.671578	0.414131	0.343157	0.538046		480	525	6	34		85	47.7612	6.08229	98.7654	0.663806	0.40597	0.327612	0.543497		463	489	23	70		75.2688	48.6345	12.5224	95.2675	0.619516	0.366066	0.239033	0.570092		479	513
	BIOHIT	R=8 / Pg1=150	563	0.538756		476	525	6	38		86.3636	47.5524	6.74956	98.7552	0.66958	0.41068	0.339161	0.541913		476	529	6	34		85	47.3632	6.03908	98.7552	0.661816	0.402587	0.323632	0.547324		460	492	22	71		76.3441	48.3193	12.611	95.4357	0.623317	0.368889	0.246634	0.568374		475	517
	EIKEN	0.4	3	0.00287081		998	3	44	0		0	99.7003	0	95.7774	0.498502	0	-0.002997	1		1002	3	40	0		0	99.7015	0	96.1612	0.498507	0	-0.00298507	1		949	3	93	0		0	99.6849	0	91.0749	0.498424	0	-0.00315126	1		990	2
	EIKEN	0.6	25	0.0239234		979	22	41	3		6.81818	97.8022	12	95.9804	0.523102	0.0666833	0.0462038	0.932077		982	23	38	2		5	97.7114	8	96.2745	0.513557	0.0488557	0.0271144	0.950276		930	22	90	3		3.22581	97.6891	12	91.1765	0.504574	0.0315126	0.00914882	0.968018		975	17
	EIKEN	0.8	51	0.0488038		956	45	38	6		13.6364	95.5045	11.7647	96.1771	0.545704	0.130233	0.0914086	0.864806		959	46	35	5		12.5	95.4229	9.80392	96.4789	0.539614	0.119279	0.0792289	0.876196		909	43	85	8		8.60215	95.4832	15.6863	91.4487	0.520427	0.0821361	0.0408534	0.915094		956	36
	EIKEN	1	71	0.0679426		941	60	33	11		25	94.006	15.493	96.6119	0.59503	0.235015	0.19006	0.752391		944	61	30	10		25	93.9303	14.0845	96.9199	0.594652	0.234826	0.189303	0.752452		895	57	79	14		15.0538	94.0126	19.7183	91.8891	0.545332	0.141524	0.0906637	0.85157		941	51
	EIKEN	1.2	87	0.0832536		928	73	30	14		31.8182	92.7073	16.092	96.8685	0.622627	0.294978	0.245255	0.685707		931	74	27	13		32.5	92.6368	14.9425	97.1816	0.625684	0.30107	0.251368	0.679004		883	69	75	18		19.3548	92.7521	20.6897	92.1712	0.560535	0.17952	0.121069	0.809702		928	64
	EIKEN	1.4	104	0.0995215		914	87	27	17		38.6364	91.3087	16.3462	97.1307	0.649725	0.352784	0.299451	0.619761		917	88	24	16		40	91.2438	15.3846	97.4495	0.656219	0.364975	0.312438	0.606356		871	81	70	23		24.7312	91.4916	22.1154	92.5611	0.581114	0.22627	0.162228	0.757482		914	78
	EIKEN	1.6	118	0.112919		903	98	24	20		45.4545	90.2098	16.9492	97.411	0.678322	0.410045	0.356643	0.554171		906	99	21	19		47.5	90.1493	16.1017	97.7346	0.688246	0.428209	0.376493	0.534162		862	90	65	28		30.1075	90.5462	23.7288	92.9881	0.603269	0.272612	0.206537	0.705289		904	88
	EIKEN	1.8	146	0.139713		878	123	21	23		52.2727	87.7123	15.7534	97.6641	0.699925	0.458496	0.39985	0.492837		879	126	20	20		50	87.4627	13.6986	97.7753	0.687313	0.437313	0.374627	0.515479		839	113	60	33		35.4839	88.1303	22.6027	93.3259	0.618071	0.31272	0.236141	0.655989		878	114
	EIKEN	2	185	0.177033		839	162	21	23		52.2727	83.8162	12.4324	97.5581	0.680445	0.43813	0.360889	0.503965		840	165	20	20		50	83.5821	10.8108	97.6744	0.66791	0.41791	0.335821	0.526265		804	148	56	37		39.7849	84.4538	20	93.4884	0.621194	0.335999	0.242387	0.621895		840	152
	EIKEN	2.2	231	0.221053		796	205	18	26		59.0909	79.5205	11.2554	97.7887	0.693057	0.469894	0.386114	0.457489		796	209	18	22		55	79.204	9.52381	97.7887	0.67102	0.435622	0.34204	0.495729		765	187	49	44		47.3118	80.3571	19.0476	93.9803	0.638345	0.380184	0.27669	0.562306		798	194
	EIKEN	2.4	290	0.277512		739	262	16	28		63.6364	73.8262	9.65517	97.8808	0.687313	0.469803	0.374625	0.448038		739	266	16	24		60	73.5323	8.27586	97.8808	0.667662	0.441194	0.335323	0.479639		713	239	42	51		54.8387	74.895	17.5862	94.4371	0.648668	0.410714	0.297337	0.516702		742	250
	EIKEN	2.6	349	0.333971		682	319	14	30		68.1818	68.1319	8.59599	97.9885	0.681568	0.464535	0.363137	0.45033		682	323	14	26		65	67.8607	7.44986	97.9885	0.664303	0.441095	0.328607	0.475177		659	293	37	56		60.2151	69.2227	16.0458	94.6839	0.647189	0.416825	0.294377	0.502999		686	306
	EIKEN	2.8	414	0.396172		621	380	10	34		77.2727	62.038	8.21256	98.4152	0.696553	0.479384	0.393107	0.442453		621	384	10	30		75	61.791	7.24638	98.4152	0.683955	0.463433	0.36791	0.45661		602	350	29	64		68.8172	63.2353	15.4589	95.4041	0.660262	0.435168	0.320525	0.48208		623	369
	EIKEN	3	471	0.450718		566	435	8	36		81.8182	56.5435	7.64331	98.6063	0.691808	0.462628	0.383616	0.471068		566	439	8	32		80	56.3184	6.79406	98.6063	0.681592	0.450547	0.363184	0.480425		549	403	25	68		73.1183	57.6681	14.4374	95.6446	0.653932	0.421659	0.307863	0.50146		567	425
	EIKEN	3.2	525	0.502392		513	488	7	37		84.0909	51.2488	7.04762	98.6538	0.676698	0.430955	0.353397	0.512814		513	492	7	33		82.5	51.0448	6.28571	98.6538	0.667724	0.421119	0.335448	0.519891		498	454	22	71		76.3441	52.3109	13.5238	95.7692	0.643275	0.399363	0.28655	0.532339		514	478
	EIKEN	3.4	581	0.555981		458	543	6	38		86.3636	45.7542	6.54045	98.7069	0.660589	0.39515	0.321179	0.559335		458	547	6	34		85	45.5721	5.85198	98.7069	0.652861	0.387363	0.305721	0.56457		444	508	20	73		78.4946	46.6387	12.5645	95.6897	0.625666	0.366088	0.251333	0.575319		460	532
	EIKEN	3.6	624	0.597129		415	586	6	38		86.3636	41.4585	6.08974	98.5748	0.639111	0.358051	0.278222	0.601087		415	590	6	34		85	41.2935	5.44872	98.5748	0.631468	0.350995	0.262935	0.605925		403	549	18	75		80.6452	42.3319	12.0192	95.7245	0.614885	0.341387	0.229771	0.608294		417	575
	EIKEN	3.8	666	0.637321		373	628	6	38		86.3636	37.2627	5.70571	98.4169	0.618132	0.321815	0.236264	0.642021		373	632	6	34		85	37.1144	5.10511	98.4169	0.610572	0.315473	0.221144	0.646498		362	590	17	76		81.7204	38.0252	11.4114	95.5145	0.598728	0.310744	0.197456	0.646144		376	616
	EIKEN	4	707	0.676555		332	669	6	38		86.3636	33.1668	5.37482	98.2249	0.597652	0.286441	0.195305	0.682101		332	673	6	34		85	33.0348	4.80905	98.2249	0.590174	0.280796	0.180348	0.686246		324	628	14	79		84.9462	34.0336	11.174	95.858	0.594899	0.289103	0.189799	0.676622		335	657
	EIKEN	4.2	751	0.71866		290	711	4	40		90.9091	28.971	5.32623	98.6395	0.599401	0.263373	0.198801	0.716084		290	715	4	36		90	28.8557	4.79361	98.6395	0.594279	0.259701	0.188557	0.718436		282	670	12	81		87.0968	29.6218	10.7856	95.9184	0.583593	0.257997	0.167186	0.715512		292	700
	EIKEN	4.4	802	0.767464		239	762	4	40		90.9091	23.8761	4.98753	98.3539	0.573926	0.217056	0.147852	0.766648		239	766	4	36		90	23.7811	4.48878	98.3539	0.568905	0.21403	0.137811	0.768721		233	719	10	83		89.2473	24.4748	10.3491	95.8848	0.56861	0.218431	0.137221	0.762868		241	751
	EIKEN	4.6	836	0.8		205	796	4	40		90.9091	20.4795	4.78469	98.0861	0.556943	0.186177	0.113886	0.800384		205	800	4	36		90	20.398	4.30622	98.0861	0.55199	0.183582	0.10398	0.802277		200	752	9	84		90.3226	21.0084	10.0478	95.6938	0.556655	0.189753	0.11331	0.795822		207	785
	EIKEN	4.8	867	0.829665		175	826	3	41		93.1818	17.4825	4.72895	98.3146	0.553322	0.162905	0.106643	0.827987		175	830	3	37		92.5	17.4129	4.26759	98.3146	0.549565	0.16107	0.0991294	0.829269		171	781	7	86		92.4731	17.9622	9.91926	96.0674	0.552177	0.166102	0.104353	0.823824		176	816
	EIKEN	5	900	0.861244		142	859	3	41		93.1818	14.1858	4.55556	97.931	0.536838	0.132186	0.0736763	0.860846		142	863	3	37		92.5	14.1294	4.11111	97.931	0.533147	0.130697	0.0662935	0.861976		139	813	6	87		93.5484	14.6008	9.66667	95.8621	0.540746	0.136589	0.0814923	0.856425		143	849
	EIKEN	5.2	931	0.890909		112	889	2	42		95.4545	11.1888	4.51128	98.2456	0.533217	0.106802	0.0664336	0.889274		112	893	2	38		95	11.1443	4.08163	98.2456	0.530721	0.105871	0.0614428	0.889963		109	843	5	88		94.6237	11.4496	9.4522	95.614	0.530366	0.10834	0.0607324	0.887135		112	880
	EIKEN	5.4	950	0.909091		94	907	1	43		97.7273	9.39061	4.52632	98.9474	0.535589	0.0917719	0.0711788	0.906379		94	911	1	39		97.5	9.35323	4.10526	98.9474	0.534266	0.091194	0.0685323	0.906812		91	861	4	89		95.6989	9.55882	9.36842	95.7895	0.526289	0.0914769	0.0525775	0.905434		93	899
	EIKEN	5.6	967	0.925359		77	924	1	43		97.7273	7.69231	4.44674	98.7179	0.527098	0.0751748	0.0541958	0.923357		77	928	1	39		97.5	7.66169	4.03309	98.7179	0.525808	0.0747015	0.0516169	0.923721		74	878	4	89		95.6989	7.77311	9.20372	94.8718	0.51736	0.0743878	0.0347203	0.923271		76	916
	EIKEN	5.8	981	0.938756		63	938	1	43		97.7273	6.29371	4.38328	98.4375	0.520105	0.0615067	0.0402098	0.937339		63	942	1	39		97.5	6.26866	3.97554	98.4375	0.518843	0.0611194	0.0376866	0.937647		60	892	4	89		95.6989	6.30252	9.07238	93.75	0.510007	0.0603144	0.0200145	0.937961		63	929
	EIKEN	6	990	0.947368		54	947	1	43		97.7273	5.39461	4.34343	98.1818	0.515609	0.05272	0.0312188	0.946327		54	951	1	39		97.5	5.37313	3.93939	98.1818	0.514366	0.0523881	0.0287313	0.946599		51	901	4	89		95.6989	5.35714	8.9899	92.7273	0.50528	0.0512673	0.0105607	0.947405		54	938
	EIKEN	6.2	1002	0.958852		43	958	0	44		100	4.2957	4.39122	100	0.521479	0.042957	0.042957	0.957043		43	962	0	40		100	4.27861	3.99202	100	0.521393	0.0427861	0.0427861	0.957214		40	912	3	90		96.7742	4.20168	8.98204	93.0233	0.504879	0.0406614	0.00975874	0.958526		43	949
	EIKEN	6.4	1009	0.96555		36	965	0	44		100	3.5964	4.36075	100	0.517982	0.035964	0.035964	0.964036		36	969	0	40		100	3.58209	3.96432	100	0.51791	0.0358209	0.0358209	0.964179		35	917	1	92		98.9247	3.67647	9.11794	97.2222	0.513006	0.0363694	0.026012	0.963295		36	956
	EIKEN	6.6	1020	0.976077		25	976	0	44		100	2.4975	4.31373	100	0.512488	0.024975	0.024975	0.975025		25	980	0	40		100	2.48756	3.92157	100	0.512438	0.0248756	0.0248756	0.975124		25	927	0	93		100	2.62605	9.11765	100	0.51313	0.0262605	0.0262605	0.973739		25	967
	EIKEN	6.8	1025	0.980861		20	981	0	44		100	1.998	4.29268	100	0.50999	0.01998	0.01998	0.98002		20	985	0	40		100	1.99005	3.90244	100	0.50995	0.0199005	0.0199005	0.9801		20	932	0	93		100	2.10084	9.07317	100	0.510504	0.0210084	0.0210084	0.978992		20	972
	EIKEN	R=.5 / Pg1=5	2	0.00191388		1000	1	43	1		2.27273	99.9001	50	95.8773	0.510864	0.0227046	0.0217283	0.977273		1003	2	40	0		0	99.801	0	96.1649	0.499005	0	-0.00199005	1		951	1	92	1		1.07527	99.895	50	91.1793	0.504851	0.0107414	0.00970227	0.989248		992	0
	EIKEN	R=.5 / Pg1=10	6	0.00574163		996	5	43	1		2.27273	99.5005	16.6667	95.8614	0.508866	0.0226137	0.0177323	0.977285		999	6	40	0		0	99.403	0	96.1501	0.497015	0	-0.00597015	1.00002		947	5	92	1		1.07527	99.4748	16.6667	91.1453	0.50275	0.0106962	0.00550059	0.989261		988	4
	EIKEN	R=.5 / Pg1=15	7	0.00669856		995	6	43	1		2.27273	99.4006	14.2857	95.8574	0.508367	0.022591	0.0167333	0.977291		998	7	40	0		0	99.3035	0	96.1464	0.496517	0	-0.00696517	1.00002		946	6	92	1		1.07527	99.3697	14.2857	91.1368	0.502225	0.0106849	0.00445017	0.989267		987	5
	EIKEN	R=.5 / Pg1=20	8	0.0076555		994	7	43	1		2.27273	99.3007	12.5	95.8534	0.507867	0.0225683	0.0157343	0.977298		997	8	40	0		0	99.204	0	96.1427	0.49602	0	-0.0079602	1.00003		945	7	92	1		1.07527	99.2647	12.5	91.1283	0.5017	0.0106736	0.00339975	0.989275		986	6
	EIKEN	R=.5 / Pg1=25	9	0.00861244		993	8	43	1		2.27273	99.2008	11.1111	95.8494	0.507368	0.0225456	0.0147353	0.977305		996	9	40	0		0	99.1045	0	96.139	0.495522	0	-0.00895522	1.00004		944	8	92	1		1.07527	99.1597	11.1111	91.1197	0.501175	0.0106623	0.00234933	0.989283		985	7
	EIKEN	R=.5 / Pg1=30	9	0.00861244		993	8	43	1		2.27273	99.2008	11.1111	95.8494	0.507368	0.0225456	0.0147353	0.977305		996	9	40	0		0	99.1045	0	96.139	0.495522	0	-0.00895522	1.00004		944	8	92	1		1.07527	99.1597	11.1111	91.1197	0.501175	0.0106623	0.00234933	0.989283		985	7
	EIKEN	R=.5 / Pg1=35	10	0.00956938		992	9	43	1		2.27273	99.1009	10	95.8454	0.506868	0.0225229	0.0137363	0.977314		995	10	40	0		0	99.005	0	96.1353	0.495025	0	-0.00995025	1.00005		943	9	92	1		1.07527	99.0546	10	91.1111	0.500649	0.010651	0.00129891	0.989292		984	8
	EIKEN	R=.5 / Pg1=40	10	0.00956938		992	9	43	1		2.27273	99.1009	10	95.8454	0.506868	0.0225229	0.0137363	0.977314		995	10	40	0		0	99.005	0	96.1353	0.495025	0	-0.00995025	1.00005		943	9	92	1		1.07527	99.0546	10	91.1111	0.500649	0.010651	0.00129891	0.989292		984	8
	EIKEN	R=.5 / Pg1=45	10	0.00956938		992	9	43	1		2.27273	99.1009	10	95.8454	0.506868	0.0225229	0.0137363	0.977314		995	10	40	0		0	99.005	0	96.1353	0.495025	0	-0.00995025	1.00005		943	9	92	1		1.07527	99.0546	10	91.1111	0.500649	0.010651	0.00129891	0.989292		984	8
	EIKEN	R=.5 / Pg1=50	11	0.0105263		991	10	43	1		2.27273	99.001	9.09091	95.8414	0.506369	0.0225002	0.0127373	0.977324		994	11	40	0		0	98.9055	0	96.1315	0.494527	0	-0.0109453	1.00006		942	10	92	1		1.07527	98.9496	9.09091	91.1025	0.500124	0.0106397	0.000248486	0.989303		983	9
	EIKEN	R=.5 / Pg1=55	11	0.0105263		991	10	43	1		2.27273	99.001	9.09091	95.8414	0.506369	0.0225002	0.0127373	0.977324		994	11	40	0		0	98.9055	0	96.1315	0.494527	0	-0.0109453	1.00006		942	10	92	1		1.07527	98.9496	9.09091	91.1025	0.500124	0.0106397	0.000248486	0.989303		983	9
	EIKEN	R=.5 / Pg1=60	11	0.0105263		991	10	43	1		2.27273	99.001	9.09091	95.8414	0.506369	0.0225002	0.0127373	0.977324		994	11	40	0		0	98.9055	0	96.1315	0.494527	0	-0.0109453	1.00006		942	10	92	1		1.07527	98.9496	9.09091	91.1025	0.500124	0.0106397	0.000248486	0.989303		983	9
	EIKEN	R=.5 / Pg1=65	11	0.0105263		991	10	43	1		2.27273	99.001	9.09091	95.8414	0.506369	0.0225002	0.0127373	0.977324		994	11	40	0		0	98.9055	0	96.1315	0.494527	0	-0.0109453	1.00006		942	10	92	1		1.07527	98.9496	9.09091	91.1025	0.500124	0.0106397	0.000248486	0.989303		983	9
	EIKEN	R=.5 / Pg1=70	11	0.0105263		991	10	43	1		2.27273	99.001	9.09091	95.8414	0.506369	0.0225002	0.0127373	0.977324		994	11	40	0		0	98.9055	0	96.1315	0.494527	0	-0.0109453	1.00006		942	10	92	1		1.07527	98.9496	9.09091	91.1025	0.500124	0.0106397	0.000248486	0.989303		983	9
	EIKEN	R=.5 / Pg1=75	11	0.0105263		991	10	43	1		2.27273	99.001	9.09091	95.8414	0.506369	0.0225002	0.0127373	0.977324		994	11	40	0		0	98.9055	0	96.1315	0.494527	0	-0.0109453	1.00006		942	10	92	1		1.07527	98.9496	9.09091	91.1025	0.500124	0.0106397	0.000248486	0.989303		983	9
	EIKEN	R=.5 / Pg1=80	11	0.0105263		991	10	43	1		2.27273	99.001	9.09091	95.8414	0.506369	0.0225002	0.0127373	0.977324		994	11	40	0		0	98.9055	0	96.1315	0.494527	0	-0.0109453	1.00006		942	10	92	1		1.07527	98.9496	9.09091	91.1025	0.500124	0.0106397	0.000248486	0.989303		983	9
	EIKEN	R=.5 / Pg1=85	11	0.0105263		991	10	43	1		2.27273	99.001	9.09091	95.8414	0.506369	0.0225002	0.0127373	0.977324		994	11	40	0		0	98.9055	0	96.1315	0.494527	0	-0.0109453	1.00006		942	10	92	1		1.07527	98.9496	9.09091	91.1025	0.500124	0.0106397	0.000248486	0.989303		983	9
	EIKEN	R=.5 / Pg1=90	11	0.0105263		991	10	43	1		2.27273	99.001	9.09091	95.8414	0.506369	0.0225002	0.0127373	0.977324		994	11	40	0		0	98.9055	0	96.1315	0.494527	0	-0.0109453	1.00006		942	10	92	1		1.07527	98.9496	9.09091	91.1025	0.500124	0.0106397	0.000248486	0.989303		983	9
	EIKEN	R=.5 / Pg1=95	11	0.0105263		991	10	43	1		2.27273	99.001	9.09091	95.8414	0.506369	0.0225002	0.0127373	0.977324		994	11	40	0		0	98.9055	0	96.1315	0.494527	0	-0.0109453	1.00006		942	10	92	1		1.07527	98.9496	9.09091	91.1025	0.500124	0.0106397	0.000248486	0.989303		983	9
	EIKEN	R=.5 / Pg1=100	11	0.0105263		991	10	43	1		2.27273	99.001	9.09091	95.8414	0.506369	0.0225002	0.0127373	0.977324		994	11	40	0		0	98.9055	0	96.1315	0.494527	0	-0.0109453	1.00006		942	10	92	1		1.07527	98.9496	9.09091	91.1025	0.500124	0.0106397	0.000248486	0.989303		983	9
	EIKEN	R=.5 / Pg1=105	11	0.0105263		991	10	43	1		2.27273	99.001	9.09091	95.8414	0.506369	0.0225002	0.0127373	0.977324		994	11	40	0		0	98.9055	0	96.1315	0.494527	0	-0.0109453	1.00006		942	10	92	1		1.07527	98.9496	9.09091	91.1025	0.500124	0.0106397	0.000248486	0.989303		983	9
	EIKEN	R=.5 / Pg1=110	11	0.0105263		991	10	43	1		2.27273	99.001	9.09091	95.8414	0.506369	0.0225002	0.0127373	0.977324		994	11	40	0		0	98.9055	0	96.1315	0.494527	0	-0.0109453	1.00006		942	10	92	1		1.07527	98.9496	9.09091	91.1025	0.500124	0.0106397	0.000248486	0.989303		983	9
	EIKEN	R=.5 / Pg1=115	11	0.0105263		991	10	43	1		2.27273	99.001	9.09091	95.8414	0.506369	0.0225002	0.0127373	0.977324		994	11	40	0		0	98.9055	0	96.1315	0.494527	0	-0.0109453	1.00006		942	10	92	1		1.07527	98.9496	9.09091	91.1025	0.500124	0.0106397	0.000248486	0.989303		983	9
	EIKEN	R=.5 / Pg1=120	11	0.0105263		991	10	43	1		2.27273	99.001	9.09091	95.8414	0.506369	0.0225002	0.0127373	0.977324		994	11	40	0		0	98.9055	0	96.1315	0.494527	0	-0.0109453	1.00006		942	10	92	1		1.07527	98.9496	9.09091	91.1025	0.500124	0.0106397	0.000248486	0.989303		983	9
	EIKEN	R=.5 / Pg1=125	11	0.0105263		991	10	43	1		2.27273	99.001	9.09091	95.8414	0.506369	0.0225002	0.0127373	0.977324		994	11	40	0		0	98.9055	0	96.1315	0.494527	0	-0.0109453	1.00006		942	10	92	1		1.07527	98.9496	9.09091	91.1025	0.500124	0.0106397	0.000248486	0.989303		983	9
	EIKEN	R=.5 / Pg1=130	11	0.0105263		991	10	43	1		2.27273	99.001	9.09091	95.8414	0.506369	0.0225002	0.0127373	0.977324		994	11	40	0		0	98.9055	0	96.1315	0.494527	0	-0.0109453	1.00006		942	10	92	1		1.07527	98.9496	9.09091	91.1025	0.500124	0.0106397	0.000248486	0.989303		983	9
	EIKEN	R=.5 / Pg1=135	11	0.0105263		991	10	43	1		2.27273	99.001	9.09091	95.8414	0.506369	0.0225002	0.0127373	0.977324		994	11	40	0		0	98.9055	0	96.1315	0.494527	0	-0.0109453	1.00006		942	10	92	1		1.07527	98.9496	9.09091	91.1025	0.500124	0.0106397	0.000248486	0.989303		983	9
	EIKEN	R=.5 / Pg1=140	11	0.0105263		991	10	43	1		2.27273	99.001	9.09091	95.8414	0.506369	0.0225002	0.0127373	0.977324		994	11	40	0		0	98.9055	0	96.1315	0.494527	0	-0.0109453	1.00006		942	10	92	1		1.07527	98.9496	9.09091	91.1025	0.500124	0.0106397	0.000248486	0.989303		983	9
	EIKEN	R=.5 / Pg1=145	11	0.0105263		991	10	43	1		2.27273	99.001	9.09091	95.8414	0.506369	0.0225002	0.0127373	0.977324		994	11	40	0		0	98.9055	0	96.1315	0.494527	0	-0.0109453	1.00006		942	10	92	1		1.07527	98.9496	9.09091	91.1025	0.500124	0.0106397	0.000248486	0.989303		983	9
	EIKEN	R=.5 / Pg1=150	11	0.0105263		991	10	43	1		2.27273	99.001	9.09091	95.8414	0.506369	0.0225002	0.0127373	0.977324		994	11	40	0		0	98.9055	0	96.1315	0.494527	0	-0.0109453	1.00006		942	10	92	1		1.07527	98.9496	9.09091	91.1025	0.500124	0.0106397	0.000248486	0.989303		983	9
	EIKEN	R=1 / Pg1=5	11	0.0105263		993	8	41	3		6.81818	99.2008	27.2727	96.0348	0.530095	0.0676369	0.0601898	0.931852		996	9	38	2		5	99.1045	18.1818	96.325	0.520522	0.0495522	0.0410448	0.950042		944	8	90	3		3.22581	99.1597	27.2727	91.2959	0.511927	0.031987	0.0238547	0.967778		987	5
	EIKEN	R=1 / Pg1=10	39	0.0373206		970	31	36	8		18.1818	96.9031	20.5128	96.4215	0.575425	0.176187	0.150849	0.818768		973	32	33	7		17.5	96.8159	17.9487	96.7197	0.57158	0.169428	0.143159	0.825614		923	29	83	10		10.7527	96.9538	25.641	91.7495	0.538532	0.104251	0.0770647	0.892993		971	21
	EIKEN	R=1 / Pg1=15	49	0.04689		961	40	35	9		20.4545	96.004	18.3673	96.4859	0.582293	0.196372	0.164585	0.796458		964	41	32	8		20	95.9204	16.3265	96.7871	0.579602	0.191841	0.159204	0.80104		914	38	82	11		11.828	96.0084	22.449	91.7671	0.539182	0.113558	0.0783636	0.882623		962	30
	EIKEN	R=1 / Pg1=20	55	0.0526316		956	45	34	10		22.7273	95.5045	18.1818	96.5657	0.591159	0.217056	0.182318	0.774034		959	46	31	9		22.5	95.4229	16.3636	96.8687	0.589614	0.214701	0.179229	0.77635		909	43	81	12		12.9032	95.4832	21.8182	91.8182	0.541932	0.123204	0.0838642	0.872138		957	35
	EIKEN	R=1 / Pg1=25	59	0.0564593		952	49	34	10		22.7273	95.1049	16.9492	96.5517	0.589161	0.216147	0.178322	0.774276		955	50	31	9		22.5	95.0249	15.2542	96.856	0.587624	0.213806	0.175249	0.776595		905	47	81	12		12.9032	95.063	20.339	91.785	0.539831	0.122662	0.0796625	0.872366		953	39
	EIKEN	R=1 / Pg1=30	61	0.0583732		950	51	34	10		22.7273	94.9051	16.3934	96.5447	0.588162	0.215693	0.176324	0.774405		953	52	31	9		22.5	94.8259	14.7541	96.8496	0.586629	0.213358	0.173259	0.776725		903	49	81	12		12.9032	94.8529	19.6721	91.7683	0.538781	0.122391	0.0775617	0.872487		951	41
	EIKEN	R=1 / Pg1=35	65	0.062201		947	54	33	11		25	94.6054	16.9231	96.6327	0.598027	0.236513	0.196054	0.751938		950	55	30	10		25	94.5274	15.3846	96.9388	0.597637	0.236318	0.195274	0.751994		901	51	79	14		15.0538	94.6429	21.5385	91.9388	0.548483	0.142473	0.0969662	0.85115		947	45
	EIKEN	R=1 / Pg1=40	67	0.0641148		945	56	33	11		25	94.4056	16.4179	96.6258	0.597028	0.236014	0.194056	0.752084		948	57	30	10		25	94.3284	14.9254	96.9325	0.596642	0.235821	0.193284	0.752141		899	53	79	14		15.0538	94.4328	20.8955	91.9223	0.547433	0.142157	0.0948654	0.851285		945	47
	EIKEN	R=1 / Pg1=45	67	0.0641148		945	56	33	11		25	94.4056	16.4179	96.6258	0.597028	0.236014	0.194056	0.752084		948	57	30	10		25	94.3284	14.9254	96.9325	0.596642	0.235821	0.193284	0.752141		899	53	79	14		15.0538	94.4328	20.8955	91.9223	0.547433	0.142157	0.0948654	0.851285		945	47
	EIKEN	R=1 / Pg1=50	68	0.0650718		944	57	33	11		25	94.3057	16.1765	96.6223	0.596528	0.235764	0.193057	0.752159		947	58	30	10		25	94.2289	14.7059	96.9294	0.596144	0.235572	0.192289	0.752217		898	54	79	14		15.0538	94.3277	20.5882	91.914	0.546907	0.141999	0.0938149	0.851354		944	48
	EIKEN	R=1 / Pg1=55	69	0.0660287		943	58	33	11		25	94.2058	15.942	96.6189	0.596029	0.235514	0.192058	0.752235		946	59	30	10		25	94.1294	14.4928	96.9262	0.595647	0.235323	0.191294	0.752294		897	55	79	14		15.0538	94.2227	20.2899	91.9057	0.546382	0.141841	0.0927645	0.851425		943	49
	EIKEN	R=1 / Pg1=60	69	0.0660287		943	58	33	11		25	94.2058	15.942	96.6189	0.596029	0.235514	0.192058	0.752235		946	59	30	10		25	94.1294	14.4928	96.9262	0.595647	0.235323	0.191294	0.752294		897	55	79	14		15.0538	94.2227	20.2899	91.9057	0.546382	0.141841	0.0927645	0.851425		943	49
	EIKEN	R=1 / Pg1=65	69	0.0660287		943	58	33	11		25	94.2058	15.942	96.6189	0.596029	0.235514	0.192058	0.752235		946	59	30	10		25	94.1294	14.4928	96.9262	0.595647	0.235323	0.191294	0.752294		897	55	79	14		15.0538	94.2227	20.2899	91.9057	0.546382	0.141841	0.0927645	0.851425		943	49
	EIKEN	R=1 / Pg1=70	71	0.0679426		941	60	33	11		25	94.006	15.493	96.6119	0.59503	0.235015	0.19006	0.752391		944	61	30	10		25	93.9303	14.0845	96.9199	0.594652	0.234826	0.189303	0.752452		895	57	79	14		15.0538	94.0126	19.7183	91.8891	0.545332	0.141524	0.0906637	0.85157		941	51
	EIKEN	R=1 / Pg1=75	71	0.0679426		941	60	33	11		25	94.006	15.493	96.6119	0.59503	0.235015	0.19006	0.752391		944	61	30	10		25	93.9303	14.0845	96.9199	0.594652	0.234826	0.189303	0.752452		895	57	79	14		15.0538	94.0126	19.7183	91.8891	0.545332	0.141524	0.0906637	0.85157		941	51
	EIKEN	R=1 / Pg1=80	71	0.0679426		941	60	33	11		25	94.006	15.493	96.6119	0.59503	0.235015	0.19006	0.752391		944	61	30	10		25	93.9303	14.0845	96.9199	0.594652	0.234826	0.189303	0.752452		895	57	79	14		15.0538	94.0126	19.7183	91.8891	0.545332	0.141524	0.0906637	0.85157		941	51
	EIKEN	R=1 / Pg1=85	71	0.0679426		941	60	33	11		25	94.006	15.493	96.6119	0.59503	0.235015	0.19006	0.752391		944	61	30	10		25	93.9303	14.0845	96.9199	0.594652	0.234826	0.189303	0.752452		895	57	79	14		15.0538	94.0126	19.7183	91.8891	0.545332	0.141524	0.0906637	0.85157		941	51
	EIKEN	R=1 / Pg1=90	71	0.0679426		941	60	33	11		25	94.006	15.493	96.6119	0.59503	0.235015	0.19006	0.752391		944	61	30	10		25	93.9303	14.0845	96.9199	0.594652	0.234826	0.189303	0.752452		895	57	79	14		15.0538	94.0126	19.7183	91.8891	0.545332	0.141524	0.0906637	0.85157		941	51
	EIKEN	R=1 / Pg1=95	71	0.0679426		941	60	33	11		25	94.006	15.493	96.6119	0.59503	0.235015	0.19006	0.752391		944	61	30	10		25	93.9303	14.0845	96.9199	0.594652	0.234826	0.189303	0.752452		895	57	79	14		15.0538	94.0126	19.7183	91.8891	0.545332	0.141524	0.0906637	0.85157		941	51
	EIKEN	R=1 / Pg1=100	71	0.0679426		941	60	33	11		25	94.006	15.493	96.6119	0.59503	0.235015	0.19006	0.752391		944	61	30	10		25	93.9303	14.0845	96.9199	0.594652	0.234826	0.189303	0.752452		895	57	79	14		15.0538	94.0126	19.7183	91.8891	0.545332	0.141524	0.0906637	0.85157		941	51
	EIKEN	R=1 / Pg1=105	71	0.0679426		941	60	33	11		25	94.006	15.493	96.6119	0.59503	0.235015	0.19006	0.752391		944	61	30	10		25	93.9303	14.0845	96.9199	0.594652	0.234826	0.189303	0.752452		895	57	79	14		15.0538	94.0126	19.7183	91.8891	0.545332	0.141524	0.0906637	0.85157		941	51
	EIKEN	R=1 / Pg1=110	71	0.0679426		941	60	33	11		25	94.006	15.493	96.6119	0.59503	0.235015	0.19006	0.752391		944	61	30	10		25	93.9303	14.0845	96.9199	0.594652	0.234826	0.189303	0.752452		895	57	79	14		15.0538	94.0126	19.7183	91.8891	0.545332	0.141524	0.0906637	0.85157		941	51
	EIKEN	R=1 / Pg1=115	71	0.0679426		941	60	33	11		25	94.006	15.493	96.6119	0.59503	0.235015	0.19006	0.752391		944	61	30	10		25	93.9303	14.0845	96.9199	0.594652	0.234826	0.189303	0.752452		895	57	79	14		15.0538	94.0126	19.7183	91.8891	0.545332	0.141524	0.0906637	0.85157		941	51
	EIKEN	R=1 / Pg1=120	71	0.0679426		941	60	33	11		25	94.006	15.493	96.6119	0.59503	0.235015	0.19006	0.752391		944	61	30	10		25	93.9303	14.0845	96.9199	0.594652	0.234826	0.189303	0.752452		895	57	79	14		15.0538	94.0126	19.7183	91.8891	0.545332	0.141524	0.0906637	0.85157		941	51
	EIKEN	R=1 / Pg1=125	71	0.0679426		941	60	33	11		25	94.006	15.493	96.6119	0.59503	0.235015	0.19006	0.752391		944	61	30	10		25	93.9303	14.0845	96.9199	0.594652	0.234826	0.189303	0.752452		895	57	79	14		15.0538	94.0126	19.7183	91.8891	0.545332	0.141524	0.0906637	0.85157		941	51
	EIKEN	R=1 / Pg1=130	71	0.0679426		941	60	33	11		25	94.006	15.493	96.6119	0.59503	0.235015	0.19006	0.752391		944	61	30	10		25	93.9303	14.0845	96.9199	0.594652	0.234826	0.189303	0.752452		895	57	79	14		15.0538	94.0126	19.7183	91.8891	0.545332	0.141524	0.0906637	0.85157		941	51
	EIKEN	R=1 / Pg1=135	71	0.0679426		941	60	33	11		25	94.006	15.493	96.6119	0.59503	0.235015	0.19006	0.752391		944	61	30	10		25	93.9303	14.0845	96.9199	0.594652	0.234826	0.189303	0.752452		895	57	79	14		15.0538	94.0126	19.7183	91.8891	0.545332	0.141524	0.0906637	0.85157		941	51
	EIKEN	R=1 / Pg1=140	71	0.0679426		941	60	33	11		25	94.006	15.493	96.6119	0.59503	0.235015	0.19006	0.752391		944	61	30	10		25	93.9303	14.0845	96.9199	0.594652	0.234826	0.189303	0.752452		895	57	79	14		15.0538	94.0126	19.7183	91.8891	0.545332	0.141524	0.0906637	0.85157		941	51
	EIKEN	R=1 / Pg1=145	71	0.0679426		941	60	33	11		25	94.006	15.493	96.6119	0.59503	0.235015	0.19006	0.752391		944	61	30	10		25	93.9303	14.0845	96.9199	0.594652	0.234826	0.189303	0.752452		895	57	79	14		15.0538	94.0126	19.7183	91.8891	0.545332	0.141524	0.0906637	0.85157		941	51
	EIKEN	R=1 / Pg1=150	71	0.0679426		941	60	33	11		25	94.006	15.493	96.6119	0.59503	0.235015	0.19006	0.752391		944	61	30	10		25	93.9303	14.0845	96.9199	0.594652	0.234826	0.189303	0.752452		895	57	79	14		15.0538	94.0126	19.7183	91.8891	0.545332	0.141524	0.0906637	0.85157		941	51
	EIKEN	R=1.5 / Pg1=5	12	0.0114833		993	8	40	4		9.09091	99.2008	33.3333	96.1278	0.541459	0.0901825	0.0829171	0.909126		996	9	37	3		7.5	99.1045	25	96.4182	0.533022	0.0743284	0.0660448	0.925043		944	8	89	4		4.30108	99.1597	33.3333	91.3843	0.517304	0.0426493	0.0346074	0.957026		987	5
	EIKEN	R=1.5 / Pg1=10	43	0.0411483		967	34	35	9		20.4545	96.6034	20.9302	96.507	0.58529	0.197598	0.170579	0.796179		970	35	32	8		20	96.5174	18.6047	96.8064	0.582587	0.193035	0.165174	0.800758		920	32	82	11		11.828	96.6387	25.5814	91.8164	0.542333	0.114304	0.0846661	0.882361		968	24
	EIKEN	R=1.5 / Pg1=15	58	0.0555024		955	46	32	12		27.2727	95.4046	20.6897	96.7579	0.613387	0.260194	0.226773	0.728723		958	47	29	11		27.5	95.3234	18.9655	97.0618	0.614117	0.262139	0.228234	0.726507		908	44	79	14		15.0538	95.3782	24.1379	91.9959	0.55216	0.14358	0.104319	0.850719		956	36
	EIKEN	R=1.5 / Pg1=20	71	0.0679426		944	57	30	14		31.8182	94.3057	19.7183	96.9199	0.630619	0.300064	0.261239	0.684192		947	58	27	13		32.5	94.2289	18.3099	97.2279	0.633644	0.306244	0.267289	0.677463		899	53	75	18		19.3548	94.4328	25.3521	92.2998	0.568938	0.182773	0.137876	0.808371		945	47
	EIKEN	R=1.5 / Pg1=25	78	0.0746411		937	64	30	14		31.8182	93.6064	17.9487	96.8976	0.627123	0.297839	0.254246	0.684809		940	65	27	13		32.5	93.5323	16.6667	97.2079	0.630162	0.30398	0.260323	0.678091		892	60	75	18		19.3548	93.6975	23.0769	92.2441	0.565262	0.18135	0.130523	0.808911		938	54
	EIKEN	R=1.5 / Pg1=30	85	0.0813397		931	70	29	15		34.0909	93.007	17.6471	96.9792	0.63549	0.317069	0.270979	0.66279		934	71	26	14		35	92.9353	16.4706	97.2917	0.639677	0.325274	0.279353	0.653828		887	65	73	20		21.5054	93.1723	23.5294	92.3958	0.573388	0.20037	0.146776	0.78791		932	60
	EIKEN	R=1.5 / Pg1=35	93	0.0889952		926	75	26	18		40.9091	92.5075	19.3548	97.2689	0.667083	0.37844	0.334166	0.59564		929	76	23	17		42.5	92.4378	18.2796	97.584	0.674689	0.392861	0.349378	0.579951		883	69	69	24		25.8065	92.7521	25.8065	92.7521	0.592793	0.23936	0.185586	0.745467		926	66
	EIKEN	R=1.5 / Pg1=40	99	0.0947368		920	81	26	18		40.9091	91.9081	18.1818	97.2516	0.664086	0.375988	0.328172	0.596424		923	82	23	17		42.5	91.8408	17.1717	97.5687	0.671704	0.390323	0.343408	0.58076		877	75	69	24		25.8065	92.1218	24.2424	92.7061	0.589641	0.237734	0.179283	0.746106		920	72
	EIKEN	R=1.5 / Pg1=45	100	0.0956938		919	82	26	18		40.9091	91.8082	18	97.2487	0.663586	0.375579	0.327173	0.59656		922	83	23	17		42.5	91.7413	17	97.5661	0.671206	0.3899	0.342413	0.580901		876	76	69	24		25.8065	92.0168	24	92.6984	0.589116	0.237463	0.178233	0.746218		919	73
	EIKEN	R=1.5 / Pg1=50	103	0.0985646		917	84	25	19		43.1818	91.6084	18.4466	97.3461	0.673951	0.395582	0.347902	0.574345		920	85	22	18		45	91.5423	17.4757	97.6645	0.682711	0.41194	0.365423	0.556465		874	78	68	25		26.8817	91.8067	24.2718	92.7813	0.593442	0.246792	0.186884	0.735759		917	75
	EIKEN	R=1.5 / Pg1=55	106	0.101435		914	87	25	19		43.1818	91.3087	17.9245	97.3376	0.672453	0.394288	0.344905	0.574791		917	88	22	18		45	91.2438	16.9811	97.6571	0.681219	0.410597	0.362438	0.556927		871	81	68	25		26.8817	91.4916	23.5849	92.7583	0.591867	0.245945	0.183733	0.736117		914	78
	EIKEN	R=1.5 / Pg1=60	107	0.102392		913	88	25	19		43.1818	91.2088	17.757	97.3348	0.671953	0.393856	0.343906	0.574943		916	89	22	18		45	91.1443	16.8224	97.6546	0.680721	0.410149	0.361443	0.557084		870	82	68	25		26.8817	91.3866	23.3645	92.7505	0.591341	0.245663	0.182683	0.736239		913	79
	EIKEN	R=1.5 / Pg1=65	107	0.102392		913	88	25	19		43.1818	91.2088	17.757	97.3348	0.671953	0.393856	0.343906	0.574943		916	89	22	18		45	91.1443	16.8224	97.6546	0.680721	0.410149	0.361443	0.557084		870	82	68	25		26.8817	91.3866	23.3645	92.7505	0.591341	0.245663	0.182683	0.736239		913	79
	EIKEN	R=1.5 / Pg1=70	109	0.104306		911	90	25	19		43.1818	91.009	17.4312	97.3291	0.670954	0.392993	0.341908	0.575252		914	91	22	18		45	90.9453	16.5138	97.6496	0.679726	0.409254	0.359453	0.557404		868	84	68	25		26.8817	91.1765	22.9358	92.735	0.590291	0.245098	0.180582	0.736487		911	81
	EIKEN	R=1.5 / Pg1=75	109	0.104306		911	90	25	19		43.1818	91.009	17.4312	97.3291	0.670954	0.392993	0.341908	0.575252		914	91	22	18		45	90.9453	16.5138	97.6496	0.679726	0.409254	0.359453	0.557404		868	84	68	25		26.8817	91.1765	22.9358	92.735	0.590291	0.245098	0.180582	0.736487		911	81
	EIKEN	R=1.5 / Pg1=80	109	0.104306		911	90	25	19		43.1818	91.009	17.4312	97.3291	0.670954	0.392993	0.341908	0.575252		914	91	22	18		45	90.9453	16.5138	97.6496	0.679726	0.409254	0.359453	0.557404		868	84	68	25		26.8817	91.1765	22.9358	92.735	0.590291	0.245098	0.180582	0.736487		911	81
	EIKEN	R=1.5 / Pg1=85	109	0.104306		911	90	25	19		43.1818	91.009	17.4312	97.3291	0.670954	0.392993	0.341908	0.575252		914	91	22	18		45	90.9453	16.5138	97.6496	0.679726	0.409254	0.359453	0.557404		868	84	68	25		26.8817	91.1765	22.9358	92.735	0.590291	0.245098	0.180582	0.736487		911	81
	EIKEN	R=1.5 / Pg1=90	109	0.104306		911	90	25	19		43.1818	91.009	17.4312	97.3291	0.670954	0.392993	0.341908	0.575252		914	91	22	18		45	90.9453	16.5138	97.6496	0.679726	0.409254	0.359453	0.557404		868	84	68	25		26.8817	91.1765	22.9358	92.735	0.590291	0.245098	0.180582	0.736487		911	81
	EIKEN	R=1.5 / Pg1=95	109	0.104306		911	90	25	19		43.1818	91.009	17.4312	97.3291	0.670954	0.392993	0.341908	0.575252		914	91	22	18		45	90.9453	16.5138	97.6496	0.679726	0.409254	0.359453	0.557404		868	84	68	25		26.8817	91.1765	22.9358	92.735	0.590291	0.245098	0.180582	0.736487		911	81
	EIKEN	R=1.5 / Pg1=100	109	0.104306		911	90	25	19		43.1818	91.009	17.4312	97.3291	0.670954	0.392993	0.341908	0.575252		914	91	22	18		45	90.9453	16.5138	97.6496	0.679726	0.409254	0.359453	0.557404		868	84	68	25		26.8817	91.1765	22.9358	92.735	0.590291	0.245098	0.180582	0.736487		911	81
	EIKEN	R=1.5 / Pg1=105	109	0.104306		911	90	25	19		43.1818	91.009	17.4312	97.3291	0.670954	0.392993	0.341908	0.575252		914	91	22	18		45	90.9453	16.5138	97.6496	0.679726	0.409254	0.359453	0.557404		868	84	68	25		26.8817	91.1765	22.9358	92.735	0.590291	0.245098	0.180582	0.736487		911	81
	EIKEN	R=1.5 / Pg1=110	109	0.104306		911	90	25	19		43.1818	91.009	17.4312	97.3291	0.670954	0.392993	0.341908	0.575252		914	91	22	18		45	90.9453	16.5138	97.6496	0.679726	0.409254	0.359453	0.557404		868	84	68	25		26.8817	91.1765	22.9358	92.735	0.590291	0.245098	0.180582	0.736487		911	81
	EIKEN	R=1.5 / Pg1=115	109	0.104306		911	90	25	19		43.1818	91.009	17.4312	97.3291	0.670954	0.392993	0.341908	0.575252		914	91	22	18		45	90.9453	16.5138	97.6496	0.679726	0.409254	0.359453	0.557404		868	84	68	25		26.8817	91.1765	22.9358	92.735	0.590291	0.245098	0.180582	0.736487		911	81
	EIKEN	R=1.5 / Pg1=120	109	0.104306		911	90	25	19		43.1818	91.009	17.4312	97.3291	0.670954	0.392993	0.341908	0.575252		914	91	22	18		45	90.9453	16.5138	97.6496	0.679726	0.409254	0.359453	0.557404		868	84	68	25		26.8817	91.1765	22.9358	92.735	0.590291	0.245098	0.180582	0.736487		911	81
	EIKEN	R=1.5 / Pg1=125	109	0.104306		911	90	25	19		43.1818	91.009	17.4312	97.3291	0.670954	0.392993	0.341908	0.575252		914	91	22	18		45	90.9453	16.5138	97.6496	0.679726	0.409254	0.359453	0.557404		868	84	68	25		26.8817	91.1765	22.9358	92.735	0.590291	0.245098	0.180582	0.736487		911	81
	EIKEN	R=1.5 / Pg1=130	109	0.104306		911	90	25	19		43.1818	91.009	17.4312	97.3291	0.670954	0.392993	0.341908	0.575252		914	91	22	18		45	90.9453	16.5138	97.6496	0.679726	0.409254	0.359453	0.557404		868	84	68	25		26.8817	91.1765	22.9358	92.735	0.590291	0.245098	0.180582	0.736487		911	81
	EIKEN	R=1.5 / Pg1=135	109	0.104306		911	90	25	19		43.1818	91.009	17.4312	97.3291	0.670954	0.392993	0.341908	0.575252		914	91	22	18		45	90.9453	16.5138	97.6496	0.679726	0.409254	0.359453	0.557404		868	84	68	25		26.8817	91.1765	22.9358	92.735	0.590291	0.245098	0.180582	0.736487		911	81
	EIKEN	R=1.5 / Pg1=140	109	0.104306		911	90	25	19		43.1818	91.009	17.4312	97.3291	0.670954	0.392993	0.341908	0.575252		914	91	22	18		45	90.9453	16.5138	97.6496	0.679726	0.409254	0.359453	0.557404		868	84	68	25		26.8817	91.1765	22.9358	92.735	0.590291	0.245098	0.180582	0.736487		911	81
	EIKEN	R=1.5 / Pg1=145	109	0.104306		911	90	25	19		43.1818	91.009	17.4312	97.3291	0.670954	0.392993	0.341908	0.575252		914	91	22	18		45	90.9453	16.5138	97.6496	0.679726	0.409254	0.359453	0.557404		868	84	68	25		26.8817	91.1765	22.9358	92.735	0.590291	0.245098	0.180582	0.736487		911	81
	EIKEN	R=1.5 / Pg1=150	109	0.104306		911	90	25	19		43.1818	91.009	17.4312	97.3291	0.670954	0.392993	0.341908	0.575252		914	91	22	18		45	90.9453	16.5138	97.6496	0.679726	0.409254	0.359453	0.557404		868	84	68	25		26.8817	91.1765	22.9358	92.735	0.590291	0.245098	0.180582	0.736487		911	81
	EIKEN	R=2 / Pg1=5	12	0.0114833		993	8	40	4		9.09091	99.2008	33.3333	96.1278	0.541459	0.0901825	0.0829171	0.909126		996	9	37	3		7.5	99.1045	25	96.4182	0.533022	0.0743284	0.0660448	0.925043		944	8	89	4		4.30108	99.1597	33.3333	91.3843	0.517304	0.0426493	0.0346074	0.957026		987	5
	EIKEN	R=2 / Pg1=10	44	0.0421053		966	35	35	9		20.4545	96.5035	20.4545	96.5035	0.58479	0.197394	0.16958	0.796223		969	36	32	8		20	96.4179	18.1818	96.8032	0.58209	0.192836	0.164179	0.800802		919	33	82	11		11.828	96.5336	25	91.8082	0.541808	0.11418	0.0836157	0.882402		967	25
	EIKEN	R=2 / Pg1=15	59	0.0564593		954	47	32	12		27.2727	95.3047	20.339	96.7546	0.612887	0.259922	0.225774	0.728787		957	48	29	11		27.5	95.2239	18.6441	97.0588	0.613619	0.261866	0.227239	0.726571		907	45	79	14		15.0538	95.2731	23.7288	91.9878	0.551634	0.143422	0.103269	0.850777		955	37
	EIKEN	R=2 / Pg1=20	74	0.0708134		941	60	30	14		31.8182	94.006	18.9189	96.9104	0.629121	0.29911	0.258242	0.684448		944	61	27	13		32.5	93.9303	17.5676	97.2194	0.632152	0.305274	0.264303	0.677723		896	56	75	18		19.3548	94.1176	24.3243	92.276	0.567362	0.182163	0.134725	0.808594		942	50
	EIKEN	R=2 / Pg1=25	89	0.0851675		926	75	30	14		31.8182	92.5075	15.7303	96.8619	0.621628	0.294342	0.243257	0.685923		929	76	27	13		32.5	92.4378	14.6067	97.1757	0.624689	0.300423	0.249378	0.679223		882	70	74	19		20.4301	92.6471	21.3483	92.2594	0.565386	0.189279	0.130772	0.799089		927	65
	EIKEN	R=2 / Pg1=30	102	0.0976077		914	87	29	15		34.0909	91.3087	14.7059	96.9247	0.626998	0.31128	0.253996	0.664797		917	88	26	14		35	91.2438	13.7255	97.2428	0.631219	0.319353	0.262438	0.655871		871	81	72	21		22.5806	91.4916	20.5882	92.3648	0.570361	0.206594	0.140722	0.778855		915	77
	EIKEN	R=2 / Pg1=35	116	0.111005		903	98	26	18		40.9091	90.2098	15.5172	97.2013	0.655594	0.36904	0.311189	0.598964		906	99	23	17		42.5	90.1493	14.6552	97.5242	0.663246	0.383134	0.326493	0.583377		863	89	66	27		29.0323	90.6513	23.2759	92.8956	0.598418	0.263181	0.196835	0.715809		903	89
	EIKEN	R=2 / Pg1=40	129	0.123445		890	111	26	18		40.9091	88.9111	13.9535	97.1616	0.649101	0.363727	0.298202	0.601224		893	112	23	17		42.5	88.8557	13.1783	97.4891	0.656779	0.377637	0.313557	0.5857		852	100	64	29		31.1828	89.4958	22.4806	93.0131	0.603393	0.279073	0.206786	0.696143		891	101
	EIKEN	R=2 / Pg1=45	141	0.134928		879	122	25	19		43.1818	87.8122	13.4752	97.2345	0.65497	0.379189	0.30994	0.581107		882	123	22	18		45	87.7612	12.766	97.5664	0.663806	0.394925	0.327612	0.563453		843	109	61	32		34.4086	88.5504	22.695	93.2522	0.614795	0.30469	0.22959	0.665832		880	112
	EIKEN	R=2 / Pg1=50	151	0.144498		873	128	21	23		52.2727	87.2128	15.2318	97.651	0.697428	0.455885	0.394855	0.494106		874	131	20	20		50	86.9652	13.245	97.7629	0.684826	0.434826	0.369652	0.516711		837	115	57	36		38.7097	87.9202	23.8411	93.6242	0.633149	0.340336	0.266298	0.624694		873	119
	EIKEN	R=2 / Pg1=55	161	0.154067		863	138	21	23		52.2727	86.2138	14.2857	97.6244	0.692433	0.450663	0.384865	0.496785		864	141	20	20		50	85.9701	12.4224	97.7376	0.679851	0.429851	0.359701	0.519311		827	125	57	36		38.7097	86.8697	22.3602	93.552	0.627897	0.33627	0.255794	0.62681		863	129
	EIKEN	R=2 / Pg1=60	168	0.160766		856	145	21	23		52.2727	85.5145	13.6905	97.6055	0.688936	0.447008	0.377872	0.498771		857	148	20	20		50	85.2736	11.9048	97.7195	0.676368	0.426368	0.352736	0.521236		820	132	57	36		38.7097	86.1345	21.4286	93.5006	0.624221	0.333424	0.248441	0.628391		857	135
	EIKEN	R=2 / Pg1=65	172	0.164593		852	149	21	23		52.2727	85.1149	13.3721	97.5945	0.686938	0.444919	0.373876	0.499946		853	152	20	20		50	84.8756	11.6279	97.709	0.674378	0.424378	0.348756	0.522374		816	136	57	36		38.7097	85.7143	20.9302	93.4708	0.62212	0.331797	0.24424	0.629332		853	139
	EIKEN	R=2 / Pg1=70	177	0.169378		847	154	21	23		52.2727	84.6154	12.9944	97.5806	0.684441	0.442308	0.368881	0.501456		848	157	20	20		50	84.3781	11.2994	97.6959	0.671891	0.421891	0.343781	0.523836		812	140	56	37		39.7849	85.2941	20.904	93.5484	0.625395	0.339342	0.250791	0.619848		848	144
	EIKEN	R=2 / Pg1=75	181	0.173206		843	158	21	23		52.2727	84.2158	12.7072	97.5694	0.682443	0.440219	0.364885	0.502696		844	161	20	20		50	83.9801	11.0497	97.6852	0.6699	0.4199	0.339801	0.525037		808	144	56	37		39.7849	84.8739	20.442	93.5185	0.623294	0.337671	0.246589	0.620858		844	148
	EIKEN	R=2 / Pg1=80	183	0.17512		841	160	21	23		52.2727	84.016	12.5683	97.5638	0.681444	0.439174	0.362887	0.503327		842	163	20	20		50	83.7811	10.929	97.6798	0.668905	0.418905	0.337811	0.525647		806	146	56	37		39.7849	84.6639	20.2186	93.5035	0.622244	0.336835	0.244488	0.621373		842	150
	EIKEN	R=2 / Pg1=85	183	0.17512		841	160	21	23		52.2727	84.016	12.5683	97.5638	0.681444	0.439174	0.362887	0.503327		842	163	20	20		50	83.7811	10.929	97.6798	0.668905	0.418905	0.337811	0.525647		806	146	56	37		39.7849	84.6639	20.2186	93.5035	0.622244	0.336835	0.244488	0.621373		842	150
	EIKEN	R=2 / Pg1=90	184	0.176077		840	161	21	23		52.2727	83.9161	12.5	97.561	0.680944	0.438652	0.361888	0.503645		841	164	20	20		50	83.6816	10.8696	97.6771	0.668408	0.418408	0.336816	0.525955		805	147	56	37		39.7849	84.5588	20.1087	93.4959	0.621719	0.336417	0.243438	0.621634		841	151
	EIKEN	R=2 / Pg1=95	184	0.176077		840	161	21	23		52.2727	83.9161	12.5	97.561	0.680944	0.438652	0.361888	0.503645		841	164	20	20		50	83.6816	10.8696	97.6771	0.668408	0.418408	0.336816	0.525955		805	147	56	37		39.7849	84.5588	20.1087	93.4959	0.621719	0.336417	0.243438	0.621634		841	151
	EIKEN	R=2 / Pg1=100	184	0.176077		840	161	21	23		52.2727	83.9161	12.5	97.561	0.680944	0.438652	0.361888	0.503645		841	164	20	20		50	83.6816	10.8696	97.6771	0.668408	0.418408	0.336816	0.525955		805	147	56	37		39.7849	84.5588	20.1087	93.4959	0.621719	0.336417	0.243438	0.621634		841	151
	EIKEN	R=2 / Pg1=105	184	0.176077		840	161	21	23		52.2727	83.9161	12.5	97.561	0.680944	0.438652	0.361888	0.503645		841	164	20	20		50	83.6816	10.8696	97.6771	0.668408	0.418408	0.336816	0.525955		805	147	56	37		39.7849	84.5588	20.1087	93.4959	0.621719	0.336417	0.243438	0.621634		841	151
	EIKEN	R=2 / Pg1=110	184	0.176077		840	161	21	23		52.2727	83.9161	12.5	97.561	0.680944	0.438652	0.361888	0.503645		841	164	20	20		50	83.6816	10.8696	97.6771	0.668408	0.418408	0.336816	0.525955		805	147	56	37		39.7849	84.5588	20.1087	93.4959	0.621719	0.336417	0.243438	0.621634		841	151
	EIKEN	R=2 / Pg1=115	185	0.177033		839	162	21	23		52.2727	83.8162	12.4324	97.5581	0.680445	0.43813	0.360889	0.503965		840	165	20	20		50	83.5821	10.8108	97.6744	0.66791	0.41791	0.335821	0.526265		804	148	56	37		39.7849	84.4538	20	93.4884	0.621194	0.335999	0.242387	0.621895		840	152
	EIKEN	R=2 / Pg1=120	185	0.177033		839	162	21	23		52.2727	83.8162	12.4324	97.5581	0.680445	0.43813	0.360889	0.503965		840	165	20	20		50	83.5821	10.8108	97.6744	0.66791	0.41791	0.335821	0.526265		804	148	56	37		39.7849	84.4538	20	93.4884	0.621194	0.335999	0.242387	0.621895		840	152
	EIKEN	R=2 / Pg1=125	185	0.177033		839	162	21	23		52.2727	83.8162	12.4324	97.5581	0.680445	0.43813	0.360889	0.503965		840	165	20	20		50	83.5821	10.8108	97.6744	0.66791	0.41791	0.335821	0.526265		804	148	56	37		39.7849	84.4538	20	93.4884	0.621194	0.335999	0.242387	0.621895		840	152
	EIKEN	R=2 / Pg1=130	185	0.177033		839	162	21	23		52.2727	83.8162	12.4324	97.5581	0.680445	0.43813	0.360889	0.503965		840	165	20	20		50	83.5821	10.8108	97.6744	0.66791	0.41791	0.335821	0.526265		804	148	56	37		39.7849	84.4538	20	93.4884	0.621194	0.335999	0.242387	0.621895		840	152
	EIKEN	R=2 / Pg1=135	185	0.177033		839	162	21	23		52.2727	83.8162	12.4324	97.5581	0.680445	0.43813	0.360889	0.503965		840	165	20	20		50	83.5821	10.8108	97.6744	0.66791	0.41791	0.335821	0.526265		804	148	56	37		39.7849	84.4538	20	93.4884	0.621194	0.335999	0.242387	0.621895		840	152
	EIKEN	R=2 / Pg1=140	185	0.177033		839	162	21	23		52.2727	83.8162	12.4324	97.5581	0.680445	0.43813	0.360889	0.503965		840	165	20	20		50	83.5821	10.8108	97.6744	0.66791	0.41791	0.335821	0.526265		804	148	56	37		39.7849	84.4538	20	93.4884	0.621194	0.335999	0.242387	0.621895		840	152
	EIKEN	R=2 / Pg1=145	185	0.177033		839	162	21	23		52.2727	83.8162	12.4324	97.5581	0.680445	0.43813	0.360889	0.503965		840	165	20	20		50	83.5821	10.8108	97.6744	0.66791	0.41791	0.335821	0.526265		804	148	56	37		39.7849	84.4538	20	93.4884	0.621194	0.335999	0.242387	0.621895		840	152
	EIKEN	R=2 / Pg1=150	185	0.177033		839	162	21	23		52.2727	83.8162	12.4324	97.5581	0.680445	0.43813	0.360889	0.503965		840	165	20	20		50	83.5821	10.8108	97.6744	0.66791	0.41791	0.335821	0.526265		804	148	56	37		39.7849	84.4538	20	93.4884	0.621194	0.335999	0.242387	0.621895		840	152
	EIKEN	R=2.5 / Pg1=5	12	0.0114833		993	8	40	4		9.09091	99.2008	33.3333	96.1278	0.541459	0.0901825	0.0829171	0.909126		996	9	37	3		7.5	99.1045	25	96.4182	0.533022	0.0743284	0.0660448	0.925043		944	8	89	4		4.30108	99.1597	33.3333	91.3843	0.517304	0.0426493	0.0346074	0.957026		987	5
	EIKEN	R=2.5 / Pg1=10	44	0.0421053		966	35	35	9		20.4545	96.5035	20.4545	96.5035	0.58479	0.197394	0.16958	0.796223		969	36	32	8		20	96.4179	18.1818	96.8032	0.58209	0.192836	0.164179	0.800802		919	33	82	11		11.828	96.5336	25	91.8082	0.541808	0.11418	0.0836157	0.882402		967	25
	EIKEN	R=2.5 / Pg1=15	60	0.0574163		953	48	32	12		27.2727	95.2048	20	96.7513	0.612388	0.259649	0.224775	0.728852		956	49	29	11		27.5	95.1244	18.3333	97.0558	0.613122	0.261592	0.226244	0.726638		906	46	79	14		15.0538	95.1681	23.3333	91.9797	0.551109	0.143264	0.102218	0.850836		954	38
	EIKEN	R=2.5 / Pg1=20	77	0.0736842		939	62	29	15		34.0909	93.8062	19.4805	97.0041	0.639486	0.319794	0.278971	0.661995		942	63	26	14		35	93.7313	18.1818	97.314	0.643657	0.32806	0.287313	0.653016		894	58	74	19		20.4301	93.9076	24.6753	92.3554	0.571688	0.191854	0.143377	0.798028		941	51
	EIKEN	R=2.5 / Pg1=25	98	0.0937799		918	83	29	15		34.0909	91.7083	15.3061	96.9377	0.628996	0.312642	0.257992	0.664286		921	84	26	14		35	91.6418	14.2857	97.2545	0.633209	0.320746	0.266418	0.655352		875	77	72	21		22.5806	91.9118	21.4286	92.397	0.572462	0.207543	0.144924	0.778407		920	72
	EIKEN	R=2.5 / Pg1=30	115	0.110048		902	99	28	16		36.3636	90.1099	13.913	96.9892	0.632368	0.327672	0.264735	0.644003		905	100	25	15		37.5	90.0498	13.0435	97.3118	0.637749	0.337687	0.275498	0.632871		860	92	70	23		24.7312	90.3361	20	92.4731	0.575337	0.223412	0.150673	0.758867		904	88
	EIKEN	R=2.5 / Pg1=35	136	0.130144		884	117	25	19		43.1818	88.3117	13.9706	97.2497	0.657468	0.381346	0.314935	0.58008		887	118	22	18		45	88.2587	13.2353	97.5798	0.666294	0.397164	0.332587	0.562393		845	107	64	29		31.1828	88.7605	21.3235	92.9593	0.599716	0.27678	0.199433	0.69729		885	107
	EIKEN	R=2.5 / Pg1=40	165	0.157895		856	145	24	20		45.4545	85.5145	12.1212	97.2727	0.654845	0.388702	0.30969	0.564361		859	146	21	19		47.5	85.4726	11.5152	97.6136	0.664863	0.405995	0.329726	0.544729		820	132	60	33		35.4839	86.1345	20	93.1818	0.608092	0.305638	0.216183	0.659893		859	133
	EIKEN	R=2.5 / Pg1=45	188	0.179904		834	167	23	21		47.7273	83.3167	11.1702	97.3162	0.65522	0.397648	0.31044	0.548705		837	168	20	20		50	83.2836	10.6383	97.6663	0.666418	0.416418	0.332836	0.527204		801	151	56	37		39.7849	84.1387	19.6809	93.4656	0.619618	0.334745	0.239236	0.622691		837	155
	EIKEN	R=2.5 / Pg1=50	212	0.202871		814	187	19	25		56.8182	81.3187	11.7925	97.7191	0.690684	0.462038	0.381369	0.470496		815	190	18	22		55	81.0945	10.3774	97.8391	0.680473	0.44602	0.360945	0.4881		783	169	50	43		46.2366	82.2479	20.283	93.9976	0.642422	0.380286	0.284845	0.566184		818	174
	EIKEN	R=2.5 / Pg1=55	241	0.230622		786	215	18	26		59.0909	78.5215	10.7884	97.7612	0.688062	0.463991	0.376124	0.462048		786	219	18	22		55	78.209	9.12863	97.7612	0.666045	0.430149	0.33209	0.499985		757	195	47	46		49.4624	79.5168	19.0871	94.1542	0.644896	0.393309	0.289792	0.545309		790	202
	EIKEN	R=2.5 / Pg1=60	262	0.250718		767	234	16	28		63.6364	76.6234	10.687	97.9566	0.701299	0.487603	0.402597	0.432294		767	238	16	24		60	76.3184	9.16031	97.9566	0.681592	0.45791	0.363184	0.464846		738	214	45	48		51.6129	77.521	18.3206	94.2529	0.64567	0.400108	0.291339	0.533537		771	221
	EIKEN	R=2.5 / Pg1=65	274	0.262201		755	246	16	28		63.6364	75.4246	10.219	97.9248	0.695305	0.479975	0.390609	0.438892		755	250	16	24		60	75.1244	8.75912	97.9248	0.675622	0.450746	0.351244	0.471041		726	226	45	48		51.6129	76.2605	17.5182	94.1634	0.639367	0.393603	0.278734	0.538969		759	233
	EIKEN	R=2.5 / Pg1=70	288	0.275598		741	260	16	28		63.6364	74.026	9.72222	97.8864	0.688312	0.471074	0.376623	0.446874		741	264	16	24		60	73.7313	8.33333	97.8864	0.668657	0.442388	0.337313	0.478544		715	237	42	51		54.8387	75.105	17.7083	94.4518	0.649719	0.411866	0.299438	0.515684		745	247
	EIKEN	R=2.5 / Pg1=75	294	0.28134		735	266	16	28		63.6364	73.4266	9.52381	97.8695	0.685315	0.46726	0.370629	0.450384		735	270	16	24		60	73.1343	8.16327	97.8695	0.665672	0.438806	0.331343	0.481847		709	243	42	51		54.8387	74.4748	17.3469	94.4075	0.646568	0.40841	0.293135	0.518756		739	253
	EIKEN	R=2.5 / Pg1=80	299	0.286124		730	271	16	28		63.6364	72.9271	9.36455	97.8552	0.682817	0.464081	0.365634	0.453349		730	275	16	24		60	72.6368	8.02676	97.8552	0.663184	0.435821	0.326368	0.484638		704	248	42	51		54.8387	73.9496	17.0569	94.37	0.643941	0.40553	0.287883	0.52136		734	258
	EIKEN	R=2.5 / Pg1=85	304	0.290909		725	276	16	28		63.6364	72.4276	9.21053	97.8408	0.68032	0.460903	0.360639	0.45635		725	280	16	24		60	72.1393	7.89474	97.8408	0.660697	0.432836	0.321393	0.487465		700	252	41	52		55.914	73.5294	17.1053	94.4669	0.647217	0.411132	0.294434	0.514225		729	263
	EIKEN	R=2.5 / Pg1=90	307	0.29378		722	279	16	28		63.6364	72.1279	9.12052	97.832	0.678821	0.458996	0.357642	0.458167		722	283	16	24		60	71.8408	7.81759	97.832	0.659204	0.431045	0.318408	0.489177		697	255	41	52		55.914	73.2143	16.9381	94.4444	0.645641	0.40937	0.291283	0.515854		726	266
	EIKEN	R=2.5 / Pg1=95	307	0.29378		722	279	16	28		63.6364	72.1279	9.12052	97.832	0.678821	0.458996	0.357642	0.458167		722	283	16	24		60	71.8408	7.81759	97.832	0.659204	0.431045	0.318408	0.489177		697	255	41	52		55.914	73.2143	16.9381	94.4444	0.645641	0.40937	0.291283	0.515854		726	266
	EIKEN	R=2.5 / Pg1=100	307	0.29378		722	279	16	28		63.6364	72.1279	9.12052	97.832	0.678821	0.458996	0.357642	0.458167		722	283	16	24		60	71.8408	7.81759	97.832	0.659204	0.431045	0.318408	0.489177		697	255	41	52		55.914	73.2143	16.9381	94.4444	0.645641	0.40937	0.291283	0.515854		726	266
	EIKEN	R=2.5 / Pg1=105	308	0.294737		721	280	16	28		63.6364	72.028	9.09091	97.829	0.678322	0.45836	0.356643	0.458775		721	284	16	24		60	71.7413	7.79221	97.829	0.658706	0.430448	0.317413	0.48975		696	256	41	52		55.914	73.1092	16.8831	94.4369	0.645116	0.408783	0.290232	0.5164		725	267
	EIKEN	R=2.5 / Pg1=110	309	0.295694		720	281	16	28		63.6364	71.9281	9.06149	97.8261	0.677822	0.457724	0.355644	0.459385		720	285	16	24		60	71.6418	7.76699	97.8261	0.658209	0.429851	0.316418	0.490325		695	257	41	52		55.914	73.0042	16.8285	94.4293	0.644591	0.408196	0.289182	0.516948		724	268
	EIKEN	R=2.5 / Pg1=115	310	0.296651		719	282	16	28		63.6364	71.8282	9.03226	97.8231	0.677323	0.457088	0.354645	0.459996		719	286	16	24		60	71.5423	7.74194	97.8231	0.657711	0.429254	0.315423	0.490901		694	258	41	52		55.914	72.8992	16.7742	94.4218	0.644066	0.407608	0.288131	0.517497		723	269
	EIKEN	R=2.5 / Pg1=120	310	0.296651		719	282	16	28		63.6364	71.8282	9.03226	97.8231	0.677323	0.457088	0.354645	0.459996		719	286	16	24		60	71.5423	7.74194	97.8231	0.657711	0.429254	0.315423	0.490901		694	258	41	52		55.914	72.8992	16.7742	94.4218	0.644066	0.407608	0.288131	0.517497		723	269
	EIKEN	R=2.5 / Pg1=125	312	0.298565		717	284	16	28		63.6364	71.6284	8.97436	97.8172	0.676324	0.455817	0.352647	0.461223		717	288	16	24		60	71.3433	7.69231	97.8172	0.656716	0.42806	0.313433	0.492058		692	260	41	52		55.914	72.6891	16.6667	94.4065	0.643015	0.406434	0.286031	0.5186		721	271
	EIKEN	R=2.5 / Pg1=130	312	0.298565		717	284	16	28		63.6364	71.6284	8.97436	97.8172	0.676324	0.455817	0.352647	0.461223		717	288	16	24		60	71.3433	7.69231	97.8172	0.656716	0.42806	0.313433	0.492058		692	260	41	52		55.914	72.6891	16.6667	94.4065	0.643015	0.406434	0.286031	0.5186		721	271
	EIKEN	R=2.5 / Pg1=135	313	0.299522		716	285	16	28		63.6364	71.5285	8.94569	97.8142	0.675824	0.455181	0.351648	0.461838		716	289	16	24		60	71.2438	7.66773	97.8142	0.656219	0.427463	0.312438	0.492638		691	261	41	52		55.914	72.584	16.6134	94.3989	0.64249	0.405846	0.28498	0.519154		720	272
	EIKEN	R=2.5 / Pg1=140	313	0.299522		716	285	16	28		63.6364	71.5285	8.94569	97.8142	0.675824	0.455181	0.351648	0.461838		716	289	16	24		60	71.2438	7.66773	97.8142	0.656219	0.427463	0.312438	0.492638		691	261	41	52		55.914	72.584	16.6134	94.3989	0.64249	0.405846	0.28498	0.519154		720	272
	EIKEN	R=2.5 / Pg1=145	313	0.299522		716	285	16	28		63.6364	71.5285	8.94569	97.8142	0.675824	0.455181	0.351648	0.461838		716	289	16	24		60	71.2438	7.66773	97.8142	0.656219	0.427463	0.312438	0.492638		691	261	41	52		55.914	72.584	16.6134	94.3989	0.64249	0.405846	0.28498	0.519154		720	272
	EIKEN	R=2.5 / Pg1=150	313	0.299522		716	285	16	28		63.6364	71.5285	8.94569	97.8142	0.675824	0.455181	0.351648	0.461838		716	289	16	24		60	71.2438	7.66773	97.8142	0.656219	0.427463	0.312438	0.492638		691	261	41	52		55.914	72.584	16.6134	94.3989	0.64249	0.405846	0.28498	0.519154		720	272
	EIKEN	R=3 / Pg1=5	12	0.0114833		993	8	40	4		9.09091	99.2008	33.3333	96.1278	0.541459	0.0901825	0.0829171	0.909126		996	9	37	3		7.5	99.1045	25	96.4182	0.533022	0.0743284	0.0660448	0.925043		944	8	89	4		4.30108	99.1597	33.3333	91.3843	0.517304	0.0426493	0.0346074	0.957026		987	5
	EIKEN	R=3 / Pg1=10	44	0.0421053		966	35	35	9		20.4545	96.5035	20.4545	96.5035	0.58479	0.197394	0.16958	0.796223		969	36	32	8		20	96.4179	18.1818	96.8032	0.58209	0.192836	0.164179	0.800802		919	33	82	11		11.828	96.5336	25	91.8082	0.541808	0.11418	0.0836157	0.882402		967	25
	EIKEN	R=3 / Pg1=15	61	0.0583732		952	49	32	12		27.2727	95.1049	19.6721	96.748	0.611888	0.259377	0.223776	0.728918		955	50	29	11		27.5	95.0249	18.0328	97.0528	0.612624	0.261318	0.225249	0.726705		905	47	79	14		15.0538	95.063	22.9508	91.9715	0.550584	0.143106	0.101168	0.850896		953	39
	EIKEN	R=3 / Pg1=20	83	0.0794258		933	68	29	15		34.0909	93.2068	18.0723	96.9854	0.636489	0.31775	0.272977	0.662583		936	69	26	14		35	93.1343	16.8675	97.2973	0.640672	0.32597	0.281343	0.653616		888	64	74	19		20.4301	93.2773	22.8916	92.3077	0.568537	0.190567	0.137074	0.798534		935	57
	EIKEN	R=3 / Pg1=25	114	0.109091		903	98	28	16		36.3636	90.2098	14.0351	96.9925	0.632867	0.328036	0.265734	0.643851		906	99	25	15		37.5	90.1493	13.1579	97.3147	0.638246	0.33806	0.276493	0.632715		860	92	71	22		23.6559	90.3361	19.2982	92.3738	0.56996	0.213698	0.13992	0.769533		904	88
	EIKEN	R=3 / Pg1=30	138	0.132057		880	121	27	17		38.6364	87.9121	12.3188	97.0232	0.632742	0.33966	0.265485	0.625429		883	122	24	16		40	87.8607	11.5942	97.3539	0.639303	0.351443	0.278607	0.612157		838	114	69	24		25.8065	88.0252	17.3913	92.3925	0.569158	0.227162	0.138317	0.751537		881	111
	EIKEN	R=3 / Pg1=35	169	0.161722		853	148	23	21		47.7273	85.2148	12.426	97.3744	0.66471	0.406707	0.329421	0.543235		856	149	20	20		50	85.1741	11.8343	97.7169	0.675871	0.425871	0.351741	0.521518		815	137	61	32		34.4086	85.6092	18.9349	93.0365	0.600089	0.294569	0.200178	0.671515		852	140
	EIKEN	R=3 / Pg1=40	213	0.203828		810	191	22	22		50	80.9191	10.3286	97.3558	0.654595	0.404595	0.309191	0.535171		813	192	19	21		52.5	80.8955	9.85915	97.7163	0.666978	0.424701	0.333955	0.51198		775	177	57	36		38.7097	81.4076	16.9014	93.149	0.600586	0.315126	0.201172	0.640483		811	181
	EIKEN	R=3 / Pg1=45	250	0.239234		774	227	21	23		52.2727	77.3227	9.2	97.3585	0.647977	0.404187	0.295954	0.528408		777	228	18	22		55	77.3134	8.8	97.7358	0.661567	0.425224	0.323134	0.503952		744	208	51	42		45.1613	78.1513	16.8	93.5849	0.616563	0.352941	0.233126	0.590309		775	217
	EIKEN	R=3 / Pg1=50	287	0.274641		741	260	17	27		61.3636	74.026	9.40767	97.7573	0.676948	0.45425	0.353896	0.465555		742	263	16	24		60	73.8308	8.36237	97.8892	0.669154	0.442985	0.338308	0.477998		714	238	44	49		52.6882	75	17.0732	94.1953	0.638441	0.395161	0.276882	0.535108		743	249
	EIKEN	R=3 / Pg1=55	331	0.316746		698	303	16	28		63.6364	69.7303	8.45921	97.7591	0.666833	0.443738	0.333666	0.473135		698	307	16	24		60	69.4527	7.25076	97.7591	0.647264	0.416716	0.294527	0.503303		674	278	40	53		56.9892	70.7983	16.0121	94.3978	0.638938	0.403474	0.277876	0.519871		700	292
	EIKEN	R=3 / Pg1=60	366	0.350239		666	335	13	31		70.4545	66.5335	8.46995	98.0854	0.68494	0.468759	0.36988	0.446424		666	339	13	27		67.5	66.2687	7.37705	98.0854	0.668843	0.447313	0.337687	0.468407		642	310	37	56		60.2151	67.437	15.3005	94.5508	0.63826	0.406072	0.27652	0.51412		667	325
	EIKEN	R=3 / Pg1=65	391	0.374163		643	358	11	33		75	64.2358	8.4399	98.318	0.696179	0.481768	0.392358	0.436358		643	362	11	29		72.5	63.9801	7.41688	98.318	0.682401	0.463856	0.364801	0.453176		620	332	34	59		63.4409	65.1261	15.0895	94.8012	0.642835	0.413165	0.285669	0.505249		643	349
	EIKEN	R=3 / Pg1=70	419	0.400957		616	385	10	34		77.2727	61.5385	8.11456	98.4026	0.694056	0.475524	0.388112	0.446746		616	389	10	30		75	61.2935	7.1599	98.4026	0.681468	0.459701	0.362935	0.460781		596	356	30	63		67.7419	62.605	15.0358	95.2077	0.651735	0.424099	0.30347	0.493859		616	376
	EIKEN	R=3 / Pg1=75	430	0.411483		605	396	10	34		77.2727	60.4396	7.90698	98.374	0.688561	0.467033	0.377123	0.456241		605	400	10	30		75	60.199	6.97674	98.374	0.675995	0.451493	0.35199	0.470013		585	367	30	63		67.7419	61.4496	14.6512	95.122	0.645958	0.416271	0.291915	0.502665		605	387
	EIKEN	R=3 / Pg1=80	441	0.42201		594	407	10	34		77.2727	59.3407	7.70975	98.3444	0.683067	0.458541	0.366134	0.465802		594	411	10	30		75	59.1045	6.80272	98.3444	0.670522	0.443284	0.341045	0.479317		574	378	30	63		67.7419	60.2941	14.2857	95.0331	0.64018	0.408444	0.280361	0.51158		595	397
	EIKEN	R=3 / Pg1=85	448	0.428708		587	414	10	34		77.2727	58.6414	7.58929	98.325	0.67957	0.453138	0.359141	0.471918		587	418	10	30		75	58.408	6.69643	98.325	0.66704	0.43806	0.33408	0.485273		568	384	29	64		68.8172	59.6639	14.2857	95.1424	0.642405	0.41059	0.284811	0.50984		588	404
	EIKEN	R=3 / Pg1=90	452	0.432536		583	418	10	34		77.2727	58.2418	7.52212	98.3137	0.677572	0.45005	0.355145	0.475424		583	422	10	30		75	58.01	6.63717	98.3137	0.66505	0.435075	0.3301	0.488688		565	387	28	65		69.8925	59.3487	14.3805	95.2782	0.646206	0.414803	0.292412	0.505864		584	408
	EIKEN	R=3 / Pg1=95	456	0.436364		579	422	10	34		77.2727	57.8422	7.45614	98.3022	0.675574	0.446962	0.351149	0.478938		579	426	10	30		75	57.6119	6.57895	98.3022	0.66306	0.43209	0.326119	0.492113		561	391	28	65		69.8925	58.9286	14.2544	95.2462	0.644105	0.411866	0.28821	0.509247		580	412
	EIKEN	R=3 / Pg1=100	457	0.437321		578	423	10	34		77.2727	57.7423	7.43982	98.2993	0.675075	0.44619	0.35015	0.479817		578	427	10	30		75	57.5124	6.56455	98.2993	0.662562	0.431343	0.325124	0.49297		560	392	28	65		69.8925	58.8235	14.2232	95.2381	0.64358	0.411132	0.28716	0.510095		579	413
	EIKEN	R=3 / Pg1=105	460	0.440191		576	425	9	35		79.5455	57.5425	7.6087	98.4615	0.68544	0.457724	0.370879	0.471278		576	429	9	31		77.5	57.3134	6.73913	98.4615	0.674067	0.444179	0.348134	0.482534		559	393	26	67		72.043	58.7185	14.5652	95.5556	0.653808	0.423026	0.307615	0.498574		577	415
	EIKEN	R=3 / Pg1=110	463	0.443062		573	428	9	35		79.5455	57.2428	7.5594	98.4536	0.683941	0.45534	0.367882	0.47398		573	432	9	31		77.5	57.0149	6.69546	98.4536	0.672575	0.441866	0.345149	0.485177		556	396	26	67		72.043	58.4034	14.4708	95.5326	0.652232	0.420755	0.304464	0.501186		574	418
	EIKEN	R=3 / Pg1=115	465	0.444976		571	430	9	35		79.5455	57.043	7.52688	98.4483	0.682942	0.453751	0.365884	0.475783		571	434	9	31		77.5	56.8159	6.66667	98.4483	0.67158	0.440323	0.343159	0.486941		554	398	26	67		72.043	58.1933	14.4086	95.5172	0.651181	0.419242	0.302363	0.502931		572	420
	EIKEN	R=3 / Pg1=120	465	0.444976		571	430	9	35		79.5455	57.043	7.52688	98.4483	0.682942	0.453751	0.365884	0.475783		571	434	9	31		77.5	56.8159	6.66667	98.4483	0.67158	0.440323	0.343159	0.486941		554	398	26	67		72.043	58.1933	14.4086	95.5172	0.651181	0.419242	0.302363	0.502931		572	420
	EIKEN	R=3 / Pg1=125	467	0.44689		569	432	9	35		79.5455	56.8432	7.49465	98.4429	0.681943	0.452161	0.363886	0.477588		569	436	9	31		77.5	56.6169	6.63812	98.4429	0.670585	0.438781	0.341169	0.488707		552	400	26	67		72.043	57.9832	14.3469	95.5017	0.650131	0.417728	0.300262	0.504679		570	422
	EIKEN	R=3 / Pg1=130	467	0.44689		569	432	9	35		79.5455	56.8432	7.49465	98.4429	0.681943	0.452161	0.363886	0.477588		569	436	9	31		77.5	56.6169	6.63812	98.4429	0.670585	0.438781	0.341169	0.488707		552	400	26	67		72.043	57.9832	14.3469	95.5017	0.650131	0.417728	0.300262	0.504679		570	422
	EIKEN	R=3 / Pg1=135	468	0.447847		568	433	9	35		79.5455	56.7433	7.47863	98.4402	0.681444	0.451367	0.362887	0.478491		568	437	9	31		77.5	56.5174	6.62393	98.4402	0.670087	0.43801	0.340174	0.48959		551	401	26	67		72.043	57.8782	14.3162	95.4939	0.649606	0.416972	0.299212	0.505553		569	423
	EIKEN	R=3 / Pg1=140	468	0.447847		568	433	9	35		79.5455	56.7433	7.47863	98.4402	0.681444	0.451367	0.362887	0.478491		568	437	9	31		77.5	56.5174	6.62393	98.4402	0.670087	0.43801	0.340174	0.48959		551	401	26	67		72.043	57.8782	14.3162	95.4939	0.649606	0.416972	0.299212	0.505553		569	423
	EIKEN	R=3 / Pg1=145	468	0.447847		568	433	9	35		79.5455	56.7433	7.47863	98.4402	0.681444	0.451367	0.362887	0.478491		568	437	9	31		77.5	56.5174	6.62393	98.4402	0.670087	0.43801	0.340174	0.48959		551	401	26	67		72.043	57.8782	14.3162	95.4939	0.649606	0.416972	0.299212	0.505553		569	423
	EIKEN	R=3 / Pg1=150	468	0.447847		568	433	9	35		79.5455	56.7433	7.47863	98.4402	0.681444	0.451367	0.362887	0.478491		568	437	9	31		77.5	56.5174	6.62393	98.4402	0.670087	0.43801	0.340174	0.48959		551	401	26	67		72.043	57.8782	14.3162	95.4939	0.649606	0.416972	0.299212	0.505553		569	423
	EIKEN	R=3.5 / Pg1=5	12	0.0114833		993	8	40	4		9.09091	99.2008	33.3333	96.1278	0.541459	0.0901825	0.0829171	0.909126		996	9	37	3		7.5	99.1045	25	96.4182	0.533022	0.0743284	0.0660448	0.925043		944	8	89	4		4.30108	99.1597	33.3333	91.3843	0.517304	0.0426493	0.0346074	0.957026		987	5
	EIKEN	R=3.5 / Pg1=10	44	0.0421053		966	35	35	9		20.4545	96.5035	20.4545	96.5035	0.58479	0.197394	0.16958	0.796223		969	36	32	8		20	96.4179	18.1818	96.8032	0.58209	0.192836	0.164179	0.800802		919	33	82	11		11.828	96.5336	25	91.8082	0.541808	0.11418	0.0836157	0.882402		967	25
	EIKEN	R=3.5 / Pg1=15	61	0.0583732		952	49	32	12		27.2727	95.1049	19.6721	96.748	0.611888	0.259377	0.223776	0.728918		955	50	29	11		27.5	95.0249	18.0328	97.0528	0.612624	0.261318	0.225249	0.726705		905	47	79	14		15.0538	95.063	22.9508	91.9715	0.550584	0.143106	0.101168	0.850896		953	39
	EIKEN	R=3.5 / Pg1=20	85	0.0813397		931	70	29	15		34.0909	93.007	17.6471	96.9792	0.63549	0.317069	0.270979	0.66279		934	71	26	14		35	92.9353	16.4706	97.2917	0.639677	0.325274	0.279353	0.653828		886	66	74	19		20.4301	93.0672	22.3529	92.2917	0.567487	0.190137	0.134973	0.798713		933	59
	EIKEN	R=3.5 / Pg1=25	124	0.11866		893	108	28	16		36.3636	89.2108	12.9032	96.9598	0.627872	0.324403	0.255744	0.645445		896	109	25	15		37.5	89.1542	12.0968	97.2856	0.633271	0.334328	0.266542	0.634341		850	102	71	22		23.6559	89.2857	17.7419	92.291	0.564708	0.211214	0.129416	0.770923		894	98
	EIKEN	R=3.5 / Pg1=30	158	0.151196		860	141	27	17		38.6364	85.9141	10.7595	96.956	0.622752	0.331941	0.245504	0.629596		863	142	24	16		40	85.8706	10.1266	97.2943	0.629353	0.343483	0.258706	0.616412		818	134	69	24		25.8065	85.9244	15.1899	92.221	0.558654	0.22174	0.117308	0.755169		861	131
	EIKEN	R=3.5 / Pg1=35	200	0.191388		823	178	22	22		50	82.2178	11	97.3964	0.661089	0.411089	0.322178	0.530679		826	179	19	21		52.5	82.1891	10.5	97.7515	0.673445	0.431493	0.346891	0.507295		785	167	60	33		35.4839	82.458	16.5	92.8994	0.589709	0.292593	0.179419	0.668585		823	169
	EIKEN	R=3.5 / Pg1=40	261	0.249761		763	238	21	23		52.2727	76.2238	8.81226	97.3214	0.642483	0.398442	0.284965	0.533217		766	239	18	22		55	76.2189	8.42912	97.7041	0.656095	0.419204	0.312189	0.508974		728	224	56	37		39.7849	76.4706	14.1762	92.8571	0.581278	0.304238	0.162555	0.646489		765	227
	EIKEN	R=3.5 / Pg1=45	308	0.294737		717	284	20	24		54.5455	71.6284	7.79221	97.2863	0.630869	0.3907	0.261738	0.535823		720	285	17	23		57.5	71.6418	7.46753	97.6934	0.645709	0.41194	0.291418	0.510924		687	265	50	43		46.2366	72.1639	13.961	93.2157	0.592002	0.333661	0.184004	0.605422		719	273
	EIKEN	R=3.5 / Pg1=50	358	0.342584		671	330	16	28		63.6364	67.033	7.82123	97.671	0.653347	0.426573	0.306693	0.49083		672	333	15	25		62.5	66.8657	6.98324	97.8166	0.646828	0.41791	0.293657	0.500413		644	308	43	50		53.7634	67.6471	13.9665	93.7409	0.607053	0.363694	0.214105	0.564317		674	318
	EIKEN	R=3.5 / Pg1=55	410	0.392344		620	381	15	29		65.9091	61.9381	7.07317	97.6378	0.639236	0.408228	0.278472	0.51097		620	385	15	25		62.5	61.6915	6.09756	97.6378	0.620958	0.385572	0.241915	0.536077		596	356	39	54		58.0645	62.605	13.1707	93.8583	0.603348	0.363513	0.206696	0.561869		623	369
	EIKEN	R=3.5 / Pg1=60	455	0.435407		578	423	12	32		72.7273	57.7423	7.03297	97.9661	0.652348	0.419944	0.304695	0.502943		578	427	12	28		70	57.5124	6.15385	97.9661	0.637562	0.402587	0.275124	0.520115		555	397	35	58		62.3656	58.2983	12.7473	94.0678	0.60332	0.363581	0.206639	0.561728		580	412
	EIKEN	R=3.5 / Pg1=65	489	0.467943		546	455	10	34		77.2727	54.5455	6.95297	98.2014	0.659091	0.421488	0.318182	0.508197		546	459	10	30		75	54.3284	6.13497	98.2014	0.646642	0.407463	0.293284	0.520663		524	428	32	61		65.5914	55.042	12.4744	94.2446	0.603167	0.361028	0.206334	0.566142		547	445
	EIKEN	R=3.5 / Pg1=70	526	0.503349		511	490	8	36		81.8182	51.049	6.84411	98.4586	0.664336	0.417673	0.328671	0.522186		511	494	8	32		80	50.8458	6.08365	98.4586	0.654229	0.406766	0.308458	0.530673		492	460	27	66		70.9677	51.6807	12.5475	94.7977	0.613242	0.366766	0.226484	0.563705		512	480
	EIKEN	R=3.5 / Pg1=75	541	0.517703		496	505	8	36		81.8182	49.5504	6.65434	98.4127	0.656843	0.405413	0.313686	0.536259		496	509	8	32		80	49.3532	5.91497	98.4127	0.646766	0.394826	0.293532	0.544527		477	475	27	66		70.9677	50.105	12.1996	94.6429	0.605364	0.355584	0.210728	0.577268		497	495
	EIKEN	R=3.5 / Pg1=80	556	0.532057		481	520	8	36		81.8182	48.0519	6.47482	98.364	0.649351	0.393152	0.298701	0.55038		481	524	8	32		80	47.8607	5.7554	98.364	0.639303	0.382886	0.278607	0.558436		462	490	27	66		70.9677	48.5294	11.8705	94.4785	0.597486	0.344402	0.194972	0.590939		483	509
	EIKEN	R=3.5 / Pg1=85	565	0.54067		472	529	8	36		81.8182	47.1528	6.37168	98.3333	0.644855	0.385796	0.28971	0.558874		472	533	8	32		80	46.9652	5.66372	98.3333	0.634826	0.375721	0.269652	0.566806		454	498	26	67		72.043	47.6891	11.8584	94.5833	0.59866	0.343566	0.197321	0.59313		474	518
	EIKEN	R=3.5 / Pg1=90	570	0.545455		467	534	8	36		81.8182	46.6533	6.31579	98.3158	0.642358	0.381709	0.284715	0.563599		467	538	8	32		80	46.4677	5.61404	98.3158	0.632338	0.371741	0.264677	0.571464		450	502	25	68		73.1183	47.2689	11.9298	94.7368	0.601936	0.345622	0.203872	0.591878		469	523
	EIKEN	R=3.5 / Pg1=95	575	0.550239		462	539	8	36		81.8182	46.1538	6.26087	98.2979	0.63986	0.377622	0.27972	0.56833		462	543	8	32		80	45.9701	5.56522	98.2979	0.629851	0.367761	0.259701	0.576127		446	506	24	69		74.1935	46.8487	12	94.8936	0.605211	0.347587	0.210423	0.590849		464	528
	EIKEN	R=3.5 / Pg1=100	577	0.552153		460	541	8	36		81.8182	45.954	6.23917	98.2906	0.638861	0.375988	0.277722	0.570223		460	545	8	32		80	45.7711	5.54593	98.2906	0.628856	0.366169	0.257711	0.577994		444	508	24	69		74.1935	46.6387	11.9584	94.8718	0.604161	0.346029	0.208322	0.59274		462	530
	EIKEN	R=3.5 / Pg1=105	581	0.555981		457	544	7	37		84.0909	45.6543	6.36833	98.4914	0.648726	0.383912	0.297453	0.566264		457	548	7	33		82.5	45.4726	5.67986	98.4914	0.639863	0.375149	0.279726	0.572668		442	510	22	71		76.3441	46.4286	12.2203	95.2586	0.613863	0.354455	0.227727	0.585619		459	533
	EIKEN	R=3.5 / Pg1=110	585	0.559809		453	548	7	37		84.0909	45.2547	6.32479	98.4783	0.646728	0.380551	0.293457	0.5701		453	552	7	33		82.5	45.0746	5.64103	98.4783	0.637873	0.371866	0.275746	0.576459		439	513	21	72		77.4194	46.1134	12.3077	95.4348	0.617664	0.357007	0.235328	0.584264		455	537
	EIKEN	R=3.5 / Pg1=115	587	0.561722		451	550	7	37		84.0909	45.0549	6.30324	98.4716	0.645729	0.378871	0.291459	0.572019		451	554	7	33		82.5	44.8756	5.62181	98.4716	0.636878	0.370224	0.273756	0.578355		437	515	21	72		77.4194	45.9034	12.2658	95.4148	0.616614	0.355381	0.233227	0.586202		453	539
	EIKEN	R=3.5 / Pg1=120	589	0.563636		449	552	7	37		84.0909	44.8551	6.28183	98.4649	0.64473	0.377191	0.289461	0.573939		449	556	7	33		82.5	44.6766	5.60272	98.4649	0.635883	0.368582	0.271766	0.580252		436	516	20	73		78.4946	45.7983	12.3939	95.614	0.621465	0.359492	0.242929	0.583121		451	541
	EIKEN	R=3.5 / Pg1=125	592	0.566507		446	555	7	37		84.0909	44.5554	6.25	98.4547	0.643232	0.374671	0.286464	0.576819		446	559	7	33		82.5	44.3781	5.57432	98.4547	0.634391	0.366119	0.268781	0.583099		433	519	20	73		78.4946	45.4832	12.3311	95.585	0.619889	0.357019	0.239778	0.586051		448	544
	EIKEN	R=3.5 / Pg1=130	592	0.566507		446	555	7	37		84.0909	44.5554	6.25	98.4547	0.643232	0.374671	0.286464	0.576819		446	559	7	33		82.5	44.3781	5.57432	98.4547	0.634391	0.366119	0.268781	0.583099		433	519	20	73		78.4946	45.4832	12.3311	95.585	0.619889	0.357019	0.239778	0.586051		448	544
	EIKEN	R=3.5 / Pg1=135	593	0.567464		445	556	7	37		84.0909	44.4555	6.23946	98.4513	0.642732	0.373831	0.285465	0.577779		445	560	7	33		82.5	44.2786	5.56492	98.4513	0.633893	0.365299	0.267786	0.584048		432	520	20	73		78.4946	45.3782	12.3103	95.5752	0.619364	0.356194	0.238728	0.587029		447	545
	EIKEN	R=3.5 / Pg1=140	593	0.567464		445	556	7	37		84.0909	44.4555	6.23946	98.4513	0.642732	0.373831	0.285465	0.577779		445	560	7	33		82.5	44.2786	5.56492	98.4513	0.633893	0.365299	0.267786	0.584048		432	520	20	73		78.4946	45.3782	12.3103	95.5752	0.619364	0.356194	0.238728	0.587029		447	545
	EIKEN	R=3.5 / Pg1=145	593	0.567464		445	556	7	37		84.0909	44.4555	6.23946	98.4513	0.642732	0.373831	0.285465	0.577779		445	560	7	33		82.5	44.2786	5.56492	98.4513	0.633893	0.365299	0.267786	0.584048		432	520	20	73		78.4946	45.3782	12.3103	95.5752	0.619364	0.356194	0.238728	0.587029		447	545
	EIKEN	R=3.5 / Pg1=150	593	0.567464		445	556	7	37		84.0909	44.4555	6.23946	98.4513	0.642732	0.373831	0.285465	0.577779		445	560	7	33		82.5	44.2786	5.56492	98.4513	0.633893	0.365299	0.267786	0.584048		432	520	20	73		78.4946	45.3782	12.3103	95.5752	0.619364	0.356194	0.238728	0.587029		447	545
	EIKEN	R=4 / Pg1=5	12	0.0114833		993	8	40	4		9.09091	99.2008	33.3333	96.1278	0.541459	0.0901825	0.0829171	0.909126		996	9	37	3		7.5	99.1045	25	96.4182	0.533022	0.0743284	0.0660448	0.925043		944	8	89	4		4.30108	99.1597	33.3333	91.3843	0.517304	0.0426493	0.0346074	0.957026		987	5
	EIKEN	R=4 / Pg1=10	44	0.0421053		966	35	35	9		20.4545	96.5035	20.4545	96.5035	0.58479	0.197394	0.16958	0.796223		969	36	32	8		20	96.4179	18.1818	96.8032	0.58209	0.192836	0.164179	0.800802		919	33	82	11		11.828	96.5336	25	91.8082	0.541808	0.11418	0.0836157	0.882402		967	25
	EIKEN	R=4 / Pg1=15	61	0.0583732		952	49	32	12		27.2727	95.1049	19.6721	96.748	0.611888	0.259377	0.223776	0.728918		955	50	29	11		27.5	95.0249	18.0328	97.0528	0.612624	0.261318	0.225249	0.726705		905	47	79	14		15.0538	95.063	22.9508	91.9715	0.550584	0.143106	0.101168	0.850896		953	39
	EIKEN	R=4 / Pg1=20	88	0.0842105		928	73	29	15		34.0909	92.7073	17.0455	96.9697	0.633991	0.316048	0.267982	0.663113		931	74	26	14		35	92.6368	15.9091	97.2832	0.638184	0.324229	0.276368	0.654157		883	69	74	19		20.4301	92.7521	21.5909	92.2675	0.565911	0.189494	0.131822	0.798993		930	62
	EIKEN	R=4 / Pg1=25	133	0.127273		884	117	28	16		36.3636	88.3117	12.0301	96.9298	0.623377	0.321133	0.246753	0.647009		887	118	25	15		37.5	88.2587	11.2782	97.2588	0.628794	0.33097	0.257587	0.635933		842	110	70	23		24.7312	88.4454	17.2932	92.3246	0.565883	0.218736	0.131766	0.761505		885	107
	EIKEN	R=4 / Pg1=30	173	0.16555		845	156	27	17		38.6364	84.4156	9.82659	96.9037	0.61526	0.326151	0.230519	0.633117		848	157	24	16		40	84.3781	9.24855	97.2477	0.621891	0.337512	0.243781	0.620004		804	148	68	25		26.8817	84.4538	14.4509	92.2018	0.556678	0.227026	0.113355	0.747527		846	146
	EIKEN	R=4 / Pg1=35	231	0.221053		792	209	22	22		50	79.1209	9.52381	97.2973	0.645604	0.395604	0.291209	0.541843		795	210	19	21		52.5	79.1045	9.09091	97.6658	0.658022	0.415299	0.316045	0.518929		757	195	57	36		38.7097	79.5168	15.5844	92.9975	0.591132	0.307807	0.182265	0.646225		792	200
	EIKEN	R=4 / Pg1=40	306	0.292823		718	283	21	23		52.2727	71.7283	7.51634	97.1583	0.620005	0.374943	0.24001	0.554724		721	284	18	22		55	71.7413	7.18954	97.5643	0.633706	0.394577	0.267413	0.531371		687	265	52	41		44.086	72.1639	13.3987	92.9635	0.581249	0.318142	0.162499	0.624598		720	272
	EIKEN	R=4 / Pg1=45	368	0.352153		657	344	20	24		54.5455	65.6344	6.52174	97.0458	0.600899	0.358006	0.201798	0.569834		660	345	17	23		57.5	65.6716	6.25	97.4889	0.615858	0.377612	0.231716	0.546323		631	321	46	47		50.5376	66.2815	12.7717	93.2053	0.584096	0.334971	0.168191	0.59862		659	333
	EIKEN	R=4 / Pg1=50	429	0.410526		600	401	16	28		63.6364	59.9401	6.52681	97.4026	0.617882	0.381437	0.235764	0.541028		601	404	15	25		62.5	59.801	5.82751	97.5649	0.611505	0.373756	0.22301	0.549746		578	374	38	55		59.1398	60.7143	12.8205	93.8312	0.59927	0.359063	0.198541	0.566827		603	389
	EIKEN	R=4 / Pg1=55	490	0.4689		540	461	15	29		65.9091	53.9461	5.91837	97.2973	0.599276	0.355554	0.198551	0.572988		540	465	15	25		62.5	53.7313	5.10204	97.2973	0.581157	0.335821	0.162313	0.59557		521	431	34	59		63.4409	54.7269	12.0408	93.8739	0.590839	0.347192	0.181678	0.581913		544	448
	EIKEN	R=4 / Pg1=60	541	0.517703		492	509	12	32		72.7273	49.1508	5.91497	97.619	0.609391	0.357461	0.218781	0.577013		492	513	12	28		70	48.9552	5.1756	97.619	0.594776	0.342687	0.189552	0.592078		474	478	30	63		67.7419	49.7899	11.6451	94.0476	0.587659	0.337287	0.175319	0.596794		495	497
	EIKEN	R=4 / Pg1=65	579	0.554067		456	545	10	34		77.2727	45.5544	5.87219	97.8541	0.614136	0.352012	0.228272	0.589987		456	549	10	30		75	45.3731	5.18135	97.8541	0.601866	0.340299	0.203731	0.600757		439	513	27	66		70.9677	46.1134	11.399	94.206	0.585406	0.327257	0.170812	0.612097		458	534
	EIKEN	R=4 / Pg1=70	620	0.593301		417	584	8	36		81.8182	41.6583	5.80645	98.1176	0.617383	0.340841	0.234765	0.611091		417	588	8	32		80	41.4925	5.16129	98.1176	0.607463	0.33194	0.214925	0.618314		403	549	22	71		76.3441	42.3319	11.4516	94.8235	0.59338	0.323179	0.18676	0.623314		419	573
	EIKEN	R=4 / Pg1=75	639	0.611483		398	603	8	36		81.8182	39.7602	5.6338	98.0296	0.607892	0.325311	0.215784	0.629238		398	607	8	32		80	39.602	5.00782	98.0296	0.59801	0.316816	0.19602	0.636233		384	568	22	71		76.3441	40.3361	11.1111	94.5813	0.583401	0.307943	0.166802	0.641824		400	592
	EIKEN	R=4 / Pg1=80	659	0.630622		378	623	8	36		81.8182	37.7622	5.46282	97.9275	0.597902	0.308964	0.195804	0.648392		378	627	8	32		80	37.6119	4.85584	97.9275	0.58806	0.300896	0.176119	0.655154		364	588	22	71		76.3441	38.2353	10.7739	94.3005	0.572897	0.291904	0.145794	0.661399		381	611
	EIKEN	R=4 / Pg1=85	669	0.640191		368	633	8	36		81.8182	36.7632	5.38117	97.8723	0.592907	0.30079	0.185814	0.657987		368	637	8	32		80	36.6169	4.78326	97.8723	0.583085	0.292935	0.166169	0.664636		355	597	21	72		77.4194	37.2899	10.7623	94.4149	0.573546	0.288696	0.147093	0.666516		371	621
	EIKEN	R=4 / Pg1=90	674	0.644976		363	638	8	36		81.8182	36.2637	5.34125	97.8437	0.59041	0.296703	0.180819	0.662789		363	642	8	32		80	36.1194	4.74777	97.8437	0.580597	0.288955	0.161194	0.669383		351	601	20	73		78.4946	36.8697	10.8309	94.6092	0.576822	0.289408	0.153644	0.666927		366	626
	EIKEN	R=4 / Pg1=95	682	0.652632		355	646	8	36		81.8182	35.4645	5.27859	97.7961	0.586414	0.290164	0.172827	0.670478		355	650	8	32		80	35.3234	4.69208	97.7961	0.576617	0.282587	0.153234	0.676983		344	608	19	74		79.5699	36.1345	10.8504	94.7658	0.578522	0.287521	0.157043	0.670537		358	634
	EIKEN	R=4 / Pg1=100	684	0.654545		353	648	8	36		81.8182	35.2647	5.26316	97.7839	0.585415	0.28853	0.170829	0.672401		353	652	8	32		80	35.1244	4.67836	97.7839	0.575622	0.280995	0.151244	0.678885		342	610	19	74		79.5699	35.9244	10.8187	94.7368	0.577471	0.28585	0.154943	0.672538		356	636
	EIKEN	R=4 / Pg1=105	688	0.658373		350	651	7	37		84.0909	34.965	5.37791	98.0392	0.59528	0.294024	0.190559	0.669526		350	655	7	33		82.5	34.8259	4.79651	98.0392	0.586629	0.287313	0.173259	0.674827		340	612	17	76		81.7204	35.7143	11.0465	95.2381	0.587174	0.291859	0.174347	0.668341		353	639
	EIKEN	R=4 / Pg1=110	692	0.662201		346	655	7	37		84.0909	34.5654	5.34682	98.017	0.593282	0.290664	0.186563	0.673408		346	659	7	33		82.5	34.4279	4.76879	98.017	0.584639	0.28403	0.169279	0.678672		337	615	16	77		82.7957	35.3992	11.1272	95.4674	0.590974	0.29309	0.181949	0.668525		349	643
	EIKEN	R=4 / Pg1=115	694	0.664115		344	657	7	37		84.0909	34.3656	5.33141	98.0057	0.592283	0.288984	0.184565	0.675349		344	661	7	33		82.5	34.2289	4.75504	98.0057	0.583644	0.282388	0.167289	0.680595		335	617	16	77		82.7957	35.1891	11.0951	95.4416	0.589924	0.29135	0.179848	0.670555		347	645
	EIKEN	R=4 / Pg1=120	696	0.666029		342	659	7	37		84.0909	34.1658	5.31609	97.9943	0.591284	0.287304	0.182567	0.677291		342	663	7	33		82.5	34.0299	4.74138	97.9943	0.582649	0.280746	0.165299	0.682518		334	618	15	78		83.871	35.084	11.2069	95.702	0.594775	0.294253	0.18955	0.668897		345	647
	EIKEN	R=4 / Pg1=125	699	0.6689		339	662	7	37		84.0909	33.8661	5.29328	97.9769	0.589785	0.284783	0.17957	0.680205		339	666	7	33		82.5	33.7313	4.72103	97.9769	0.581157	0.278284	0.162313	0.685404		331	621	15	78		83.871	34.7689	11.1588	95.6647	0.593199	0.29161	0.186399	0.671955		342	650
	EIKEN	R=4 / Pg1=130	700	0.669856		338	663	7	37		84.0909	33.7662	5.28571	97.971	0.589286	0.283943	0.178571	0.681176		338	667	7	33		82.5	33.6318	4.71429	97.971	0.580659	0.277463	0.161318	0.686366		330	622	15	78		83.871	34.6639	11.1429	95.6522	0.592674	0.290729	0.185348	0.672975		341	651
	EIKEN	R=4 / Pg1=135	701	0.670813		337	664	7	37		84.0909	33.6663	5.27817	97.9651	0.588786	0.283103	0.177572	0.682148		337	668	7	33		82.5	33.5323	4.70756	97.9651	0.580162	0.276642	0.160323	0.687328		329	623	15	78		83.871	34.5588	11.127	95.6395	0.592149	0.289848	0.184298	0.673995		340	652
	EIKEN	R=4 / Pg1=140	701	0.670813		337	664	7	37		84.0909	33.6663	5.27817	97.9651	0.588786	0.283103	0.177572	0.682148		337	668	7	33		82.5	33.5323	4.70756	97.9651	0.580162	0.276642	0.160323	0.687328		329	623	15	78		83.871	34.5588	11.127	95.6395	0.592149	0.289848	0.184298	0.673995		340	652
	EIKEN	R=4 / Pg1=145	701	0.670813		337	664	7	37		84.0909	33.6663	5.27817	97.9651	0.588786	0.283103	0.177572	0.682148		337	668	7	33		82.5	33.5323	4.70756	97.9651	0.580162	0.276642	0.160323	0.687328		329	623	15	78		83.871	34.5588	11.127	95.6395	0.592149	0.289848	0.184298	0.673995		340	652
	EIKEN	R=4 / Pg1=150	701	0.670813		337	664	7	37		84.0909	33.6663	5.27817	97.9651	0.588786	0.283103	0.177572	0.682148		337	668	7	33		82.5	33.5323	4.70756	97.9651	0.580162	0.276642	0.160323	0.687328		329	623	15	78		83.871	34.5588	11.127	95.6395	0.592149	0.289848	0.184298	0.673995		340	652
	EIKEN	R=4.5 / Pg1=5	12	0.0114833		993	8	40	4		9.09091	99.2008	33.3333	96.1278	0.541459	0.0901825	0.0829171	0.909126		996	9	37	3		7.5	99.1045	25	96.4182	0.533022	0.0743284	0.0660448	0.925043		944	8	89	4		4.30108	99.1597	33.3333	91.3843	0.517304	0.0426493	0.0346074	0.957026		987	5
	EIKEN	R=4.5 / Pg1=10	44	0.0421053		966	35	35	9		20.4545	96.5035	20.4545	96.5035	0.58479	0.197394	0.16958	0.796223		969	36	32	8		20	96.4179	18.1818	96.8032	0.58209	0.192836	0.164179	0.800802		919	33	82	11		11.828	96.5336	25	91.8082	0.541808	0.11418	0.0836157	0.882402		967	25
	EIKEN	R=4.5 / Pg1=15	61	0.0583732		952	49	32	12		27.2727	95.1049	19.6721	96.748	0.611888	0.259377	0.223776	0.728918		955	50	29	11		27.5	95.0249	18.0328	97.0528	0.612624	0.261318	0.225249	0.726705		905	47	79	14		15.0538	95.063	22.9508	91.9715	0.550584	0.143106	0.101168	0.850896		953	39
	EIKEN	R=4.5 / Pg1=20	89	0.0851675		927	74	29	15		34.0909	92.6074	16.8539	96.9665	0.633492	0.315707	0.266983	0.663224		930	75	26	14		35	92.5373	15.7303	97.2803	0.637687	0.323881	0.275373	0.65427		882	70	74	19		20.4301	92.6471	21.3483	92.2594	0.565386	0.189279	0.130772	0.799089		929	63
	EIKEN	R=4.5 / Pg1=25	143	0.136842		875	126	27	17		38.6364	87.4126	11.8881	97.0067	0.630245	0.33773	0.26049	0.626414		878	127	24	16		40	87.3632	11.1888	97.3392	0.636816	0.349453	0.273632	0.613163		833	119	69	24		25.8065	87.5	16.7832	92.3503	0.566532	0.225806	0.133065	0.752392		876	116
	EIKEN	R=4.5 / Pg1=30	196	0.18756		823	178	26	18		40.9091	82.2178	9.18367	96.9376	0.615634	0.336345	0.231269	0.617085		826	179	23	17		42.5	82.1891	8.67347	97.2909	0.623445	0.349303	0.246891	0.601953		783	169	66	27		29.0323	82.2479	13.7755	92.2261	0.556401	0.238784	0.112802	0.731543		824	168
	EIKEN	R=4.5 / Pg1=35	270	0.258373		754	247	21	23		52.2727	75.3247	8.51852	97.2903	0.637987	0.393743	0.275974	0.537286		757	248	18	22		55	75.3234	8.14815	97.6774	0.651617	0.414279	0.303234	0.513219		720	232	55	38		40.8602	75.6303	14.0741	92.9032	0.582452	0.309027	0.164905	0.63964		754	238
	EIKEN	R=4.5 / Pg1=40	353	0.337799		673	328	19	25		56.8182	67.2328	7.08215	97.2543	0.620255	0.382004	0.240509	0.542067		676	329	16	24		60	67.2637	6.79887	97.6879	0.636318	0.403582	0.272637	0.516882		643	309	49	44		47.3118	67.542	12.4646	92.9191	0.574269	0.319554	0.148538	0.618835		674	318
	EIKEN	R=4.5 / Pg1=45	425	0.406699		602	399	18	26		59.0909	60.1399	6.11765	97.0968	0.596154	0.355372	0.192308	0.571173		605	400	15	25		62.5	60.199	5.88235	97.5806	0.613495	0.376244	0.22699	0.546843		577	375	43	50		53.7634	60.6092	11.7647	93.0645	0.571863	0.325856	0.143727	0.607409		603	389
	EIKEN	R=4.5 / Pg1=50	504	0.482297		527	474	14	30		68.1818	52.6474	5.95238	97.4122	0.604146	0.358959	0.208292	0.570497		528	477	13	27		67.5	52.5373	5.35714	97.597	0.600187	0.354627	0.200373	0.575235		506	446	35	58		62.3656	53.1513	11.5079	93.5305	0.577584	0.331481	0.155169	0.600929		529	463
	EIKEN	R=4.5 / Pg1=55	577	0.552153		455	546	13	31		70.4545	45.4545	5.37262	97.2222	0.579545	0.320248	0.159091	0.620334		455	550	13	27		67.5	45.2736	4.67938	97.2222	0.563868	0.305597	0.127736	0.636492		438	514	30	63		67.7419	46.0084	10.9185	93.5897	0.568752	0.31167	0.137503	0.628942		458	534
	EIKEN	R=4.5 / Pg1=60	636	0.608612		399	602	10	34		77.2727	39.8601	5.34591	97.555	0.585664	0.30801	0.171329	0.64291		399	606	10	30		75	39.7015	4.71698	97.555	0.573507	0.297761	0.147015	0.652756		383	569	26	67		72.043	40.2311	10.5346	93.643	0.561371	0.289837	0.122741	0.659842		401	591
	EIKEN	R=4.5 / Pg1=65	675	0.645933		362	639	8	36		81.8182	36.1638	5.33333	97.8378	0.58991	0.295886	0.17982	0.66375		362	643	8	32		80	36.0199	4.74074	97.8378	0.5801	0.288159	0.160199	0.670332		347	605	23	70		75.2688	36.4496	10.3704	93.7838	0.558592	0.274352	0.117184	0.68193		363	629
	EIKEN	R=4.5 / Pg1=70	722	0.690909		317	684	6	38		86.3636	31.6683	5.26316	98.1424	0.59016	0.273499	0.18032	0.69679		317	688	6	34		85	31.5423	4.70914	98.1424	0.582711	0.268109	0.165423	0.700818		306	646	17	76		81.7204	32.1429	10.5263	94.7368	0.569316	0.262673	0.138633	0.702761		318	674
	EIKEN	R=4.5 / Pg1=75	743	0.711005		296	705	6	38		86.3636	29.5704	5.1144	98.0132	0.57967	0.255381	0.159341	0.717375		296	709	6	34		85	29.4527	4.57604	98.0132	0.572264	0.250348	0.144527	0.721243		285	667	17	76		81.7204	29.937	10.2288	94.3709	0.558287	0.244646	0.116574	0.724084		297	695
	EIKEN	R=4.5 / Pg1=80	763	0.730144		276	725	6	38		86.3636	27.5724	4.98034	97.8723	0.56968	0.238126	0.139361	0.737001		276	729	6	34		85	27.4627	4.45609	97.8723	0.562313	0.233433	0.124627	0.74072		265	687	17	76		81.7204	27.8361	9.96068	93.9716	0.547783	0.227478	0.0955656	0.74443		278	714
	EIKEN	R=4.5 / Pg1=85	775	0.741627		264	737	6	38		86.3636	26.3736	4.90323	97.7778	0.563686	0.227772	0.127373	0.748785		264	741	6	34		85	26.2687	4.3871	97.7778	0.556343	0.223284	0.112687	0.752417		254	698	16	77		82.7957	26.6807	9.93548	94.0741	0.547382	0.220904	0.0947637	0.753108		266	726
	EIKEN	R=4.5 / Pg1=90	780	0.746411		259	742	6	38		86.3636	25.8741	4.87179	97.7358	0.561189	0.223458	0.122378	0.753697		259	746	6	34		85	25.7711	4.35897	97.7358	0.553856	0.219055	0.107711	0.757293		250	702	15	78		83.871	26.2605	10	94.3396	0.550657	0.220249	0.101315	0.754828		261	731
	EIKEN	R=4.5 / Pg1=95	788	0.754067		251	750	6	38		86.3636	25.0749	4.82234	97.6654	0.557193	0.216556	0.114386	0.761559		251	754	6	34		85	24.9751	4.31472	97.6654	0.549876	0.212289	0.0997512	0.765097		243	709	14	79		84.9462	25.5252	10.0254	94.5525	0.552357	0.216827	0.104714	0.75981		253	739
	EIKEN	R=4.5 / Pg1=100	790	0.755981		249	752	6	38		86.3636	24.8751	4.81013	97.6471	0.556194	0.214831	0.112388	0.763525		249	756	6	34		85	24.7761	4.3038	97.6471	0.548881	0.210597	0.0977612	0.767048		241	711	14	79		84.9462	25.3151	10	94.5098	0.551307	0.215042	0.102614	0.761869		251	741
	EIKEN	R=4.5 / Pg1=105	795	0.760766		245	756	5	39		88.6364	24.4755	4.90566	98	0.565559	0.216942	0.131119	0.763746		245	760	5	35		87.5	24.3781	4.40252	98	0.559391	0.213308	0.118781	0.76648		238	714	12	81		87.0968	25	10.1887	95.2	0.560484	0.217742	0.120968	0.761019		247	745
	EIKEN	R=4.5 / Pg1=110	801	0.766507		239	762	5	39		88.6364	23.8761	4.86891	97.9508	0.562562	0.211629	0.125125	0.769674		239	766	5	35		87.5	23.7811	4.36954	97.9508	0.556405	0.208085	0.112811	0.772371		233	719	11	82		88.172	24.4748	10.2372	95.4918	0.563234	0.215799	0.126468	0.764458		241	751
	EIKEN	R=4.5 / Pg1=115	804	0.769378		236	765	5	39		88.6364	23.5764	4.85075	97.9253	0.561064	0.208973	0.122128	0.772638		236	769	5	35		87.5	23.4826	4.35323	97.9253	0.554913	0.205473	0.109826	0.775317		230	722	11	82		88.172	24.1597	10.199	95.4357	0.561659	0.213021	0.123317	0.767571		238	754
	EIKEN	R=4.5 / Pg1=120	807	0.772249		233	768	5	39		88.6364	23.2767	4.83271	97.8992	0.559565	0.206316	0.119131	0.775603		233	772	5	35		87.5	23.1841	4.33705	97.8992	0.55342	0.202861	0.106841	0.778263		228	724	10	83		89.2473	23.9496	10.285	95.7983	0.565984	0.213744	0.131969	0.768068		235	757
	EIKEN	R=4.5 / Pg1=125	810	0.77512		230	771	5	39		88.6364	22.977	4.81481	97.8723	0.558067	0.20366	0.116134	0.778567		230	775	5	35		87.5	22.8856	4.32099	97.8723	0.551928	0.200249	0.103856	0.78121		225	727	10	83		89.2473	23.6345	10.2469	95.7447	0.564409	0.210931	0.128818	0.771188		232	760
	EIKEN	R=4.5 / Pg1=130	811	0.776077		229	772	5	39		88.6364	22.8771	4.80888	97.8632	0.557567	0.202774	0.115135	0.779556		229	776	5	35		87.5	22.7861	4.31566	97.8632	0.55143	0.199378	0.102861	0.782192		224	728	10	83		89.2473	23.5294	10.2343	95.7265	0.563884	0.209994	0.127767	0.772229		231	761
	EIKEN	R=4.5 / Pg1=135	813	0.77799		227	774	5	39		88.6364	22.6773	4.79705	97.8448	0.556568	0.201004	0.113137	0.781532		227	778	5	35		87.5	22.5871	4.30504	97.8448	0.550435	0.197637	0.100871	0.784156		222	730	10	83		89.2473	23.3193	10.2091	95.6897	0.562833	0.208119	0.125666	0.774309		229	763
	EIKEN	R=4.5 / Pg1=140	813	0.77799		227	774	5	39		88.6364	22.6773	4.79705	97.8448	0.556568	0.201004	0.113137	0.781532		227	778	5	35		87.5	22.5871	4.30504	97.8448	0.550435	0.197637	0.100871	0.784156		222	730	10	83		89.2473	23.3193	10.2091	95.6897	0.562833	0.208119	0.125666	0.774309		229	763
	EIKEN	R=4.5 / Pg1=145	813	0.77799		227	774	5	39		88.6364	22.6773	4.79705	97.8448	0.556568	0.201004	0.113137	0.781532		227	778	5	35		87.5	22.5871	4.30504	97.8448	0.550435	0.197637	0.100871	0.784156		222	730	10	83		89.2473	23.3193	10.2091	95.6897	0.562833	0.208119	0.125666	0.774309		229	763
	EIKEN	R=4.5 / Pg1=150	813	0.77799		227	774	5	39		88.6364	22.6773	4.79705	97.8448	0.556568	0.201004	0.113137	0.781532		227	778	5	35		87.5	22.5871	4.30504	97.8448	0.550435	0.197637	0.100871	0.784156		222	730	10	83		89.2473	23.3193	10.2091	95.6897	0.562833	0.208119	0.125666	0.774309		229	763
	EIKEN	R=5 / Pg1=5	12	0.0114833		993	8	40	4		9.09091	99.2008	33.3333	96.1278	0.541459	0.0901825	0.0829171	0.909126		996	9	37	3		7.5	99.1045	25	96.4182	0.533022	0.0743284	0.0660448	0.925043		944	8	89	4		4.30108	99.1597	33.3333	91.3843	0.517304	0.0426493	0.0346074	0.957026		987	5
	EIKEN	R=5 / Pg1=10	44	0.0421053		966	35	35	9		20.4545	96.5035	20.4545	96.5035	0.58479	0.197394	0.16958	0.796223		969	36	32	8		20	96.4179	18.1818	96.8032	0.58209	0.192836	0.164179	0.800802		919	33	82	11		11.828	96.5336	25	91.8082	0.541808	0.11418	0.0836157	0.882402		967	25
	EIKEN	R=5 / Pg1=15	61	0.0583732		952	49	32	12		27.2727	95.1049	19.6721	96.748	0.611888	0.259377	0.223776	0.728918		955	50	29	11		27.5	95.0249	18.0328	97.0528	0.612624	0.261318	0.225249	0.726705		905	47	79	14		15.0538	95.063	22.9508	91.9715	0.550584	0.143106	0.101168	0.850896		953	39
	EIKEN	R=5 / Pg1=20	90	0.0861244		926	75	29	15		34.0909	92.5075	16.6667	96.9634	0.632992	0.315366	0.265984	0.663336		929	76	26	14		35	92.4378	15.5556	97.2775	0.637189	0.323532	0.274378	0.654384		881	71	74	19		20.4301	92.542	21.1111	92.2513	0.564861	0.189064	0.129721	0.799186		928	64
	EIKEN	R=5 / Pg1=25	147	0.14067		871	130	27	17		38.6364	87.013	11.5646	96.9933	0.628247	0.336187	0.256494	0.627229		874	131	24	16		40	86.9652	10.8844	97.3274	0.634826	0.347861	0.269652	0.613996		829	123	69	24		25.8065	87.0798	16.3265	92.3163	0.564431	0.224722	0.128863	0.753101		872	120
	EIKEN	R=5 / Pg1=30	208	0.199043		811	190	26	18		40.9091	81.019	8.65385	96.8937	0.60964	0.331441	0.219281	0.620646		814	191	23	17		42.5	80.995	8.17308	97.2521	0.617475	0.344229	0.23495	0.605594		771	181	66	27		29.0323	80.9874	12.9808	92.1147	0.550098	0.235125	0.100197	0.734704		812	180
	EIKEN	R=5 / Pg1=35	295	0.282297		730	271	20	24		54.5455	72.9271	8.13559	97.3333	0.637363	0.397784	0.274725	0.529061		733	272	17	23		57.5	72.9353	7.79661	97.7333	0.652177	0.419378	0.304353	0.50386		696	256	54	39		41.9355	73.1092	13.2203	92.8	0.575224	0.306587	0.150447	0.639891		729	263
	EIKEN	R=5 / Pg1=40	393	0.376077		634	367	18	26		59.0909	63.3367	6.61578	97.2393	0.612138	0.374262	0.224276	0.549341		637	368	15	25		62.5	63.3831	6.36132	97.6994	0.629415	0.396144	0.258831	0.524123		604	348	48	45		48.3871	63.4454	11.4504	92.638	0.559162	0.306994	0.118325	0.632466		634	358
	EIKEN	R=5 / Pg1=45	478	0.457416		550	451	17	27		61.3636	54.9451	5.64854	97.0018	0.581543	0.337163	0.163087	0.593525		553	452	14	26		65	55.0249	5.43933	97.5309	0.600124	0.357662	0.200249	0.569891		527	425	40	53		56.9892	55.3571	11.0879	92.9453	0.561732	0.315476	0.123464	0.619912		550	442
	EIKEN	R=5 / Pg1=50	563	0.538756		469	532	13	31		70.4545	46.8531	5.50622	97.3029	0.586538	0.330102	0.173077	0.608073		470	535	12	28		70	46.7662	4.97336	97.5104	0.583831	0.327363	0.167662	0.611052		450	502	32	61		65.5914	47.2689	10.8348	93.361	0.564302	0.310043	0.128603	0.629644		470	522
	EIKEN	R=5 / Pg1=55	643	0.615311		390	611	12	32		72.7273	38.961	4.97667	97.0149	0.558442	0.283353	0.116883	0.668547		390	615	12	28		70	38.806	4.35459	97.0149	0.54403	0.271642	0.0880597	0.681521		375	577	27	66		70.9677	39.3908	10.2644	93.2836	0.551792	0.279547	0.103585	0.672038		392	600
	EIKEN	R=5 / Pg1=60	707	0.676555		329	672	9	35		79.5455	32.8671	4.9505	97.3373	0.562063	0.261443	0.124126	0.701798		329	676	9	31		77.5	32.7363	4.38472	97.3373	0.551182	0.253706	0.102363	0.709271		315	637	23	70		75.2688	33.0882	9.90099	93.1953	0.541785	0.249051	0.0835705	0.713359		330	662
	EIKEN	R=5 / Pg1=65	749	0.716746		289	712	7	37		84.0909	28.8711	4.93992	97.6351	0.56481	0.24278	0.12962	0.728863		289	716	7	33		82.5	28.7562	4.40587	97.6351	0.556281	0.237239	0.112562	0.733616		276	676	20	73		78.4946	28.9916	9.74633	93.2432	0.537431	0.227568	0.0748622	0.741935		289	703
	EIKEN	R=5 / Pg1=70	798	0.763636		242	759	5	39		88.6364	24.1758	4.88722	97.9757	0.564061	0.214286	0.128122	0.76671		242	763	5	35		87.5	24.0796	4.38596	97.9757	0.557898	0.210697	0.115796	0.769426		233	719	14	79		84.9462	24.4748	9.89975	94.332	0.547105	0.207904	0.0942103	0.770109		242	750
	EIKEN	R=5 / Pg1=75	820	0.784689		220	781	5	39		88.6364	21.978	4.7561	97.7778	0.553072	0.194805	0.106144	0.788452		220	785	5	35		87.5	21.8905	4.26829	97.7778	0.546953	0.191542	0.0939055	0.791033		211	741	14	79		84.9462	22.1639	9.63415	93.7778	0.535551	0.188274	0.071101	0.792785		220	772
	EIKEN	R=5 / Pg1=80	840	0.803828		200	801	5	39		88.6364	19.98	4.64286	97.561	0.543082	0.177096	0.0861638	0.808228		200	805	5	35		87.5	19.9005	4.16667	97.561	0.537002	0.174129	0.074005	0.81069		191	761	14	79		84.9462	20.063	9.40476	93.1707	0.525046	0.170428	0.0500926	0.813421		201	791
	EIKEN	R=5 / Pg1=85	854	0.817225		186	815	5	39		88.6364	18.5814	4.56674	97.3822	0.536089	0.164699	0.0721778	0.822078		186	819	5	35		87.5	18.5075	4.09836	97.3822	0.530037	0.16194	0.0600746	0.824456		178	774	13	80		86.0215	18.6975	9.36768	93.1937	0.523595	0.160839	0.0471898	0.824954		187	805
	EIKEN	R=5 / Pg1=90	860	0.822967		180	821	5	39		88.6364	17.982	4.53488	97.2973	0.533092	0.159386	0.0661838	0.828015		180	825	5	35		87.5	17.9104	4.06977	97.2973	0.527052	0.156716	0.0541045	0.830358		173	779	12	81		87.0968	18.1723	9.4186	93.5135	0.526345	0.158275	0.0526904	0.828388		181	811
	EIKEN	R=5 / Pg1=95	869	0.831579		171	830	5	39		88.6364	17.0829	4.48792	97.1591	0.528596	0.151417	0.0571928	0.836921		171	834	5	35		87.5	17.0149	4.02762	97.1591	0.522575	0.148881	0.0451493	0.839212		165	787	11	82		88.172	17.3319	9.43613	93.75	0.52752	0.152819	0.0550398	0.835099		172	820
	EIKEN	R=5 / Pg1=100	871	0.833493		169	832	5	39		88.6364	16.8831	4.47761	97.1264	0.527597	0.149646	0.0551948	0.838901		169	836	5	35		87.5	16.8159	4.01837	97.1264	0.52158	0.147139	0.0431592	0.84118		163	789	11	82		88.172	17.1218	9.41447	93.6782	0.526469	0.150967	0.0529389	0.837179		170	822
	EIKEN	R=5 / Pg1=105	876	0.838278		165	836	4	40		90.9091	16.4835	4.56621	97.6331	0.536963	0.14985	0.0739261	0.840098		165	840	4	36		90	16.4179	4.10959	97.6331	0.53209	0.147761	0.0641791	0.841782		160	792	9	84		90.3226	16.8067	9.58904	94.6746	0.535646	0.151803	0.071293	0.837542		166	826
	EIKEN	R=5 / Pg1=110	882	0.844019		159	842	4	40		90.9091	15.8841	4.53515	97.546	0.533966	0.144401	0.0679321	0.846057		159	846	4	36		90	15.8209	4.08163	97.546	0.529104	0.142388	0.058209	0.84771		155	797	8	85		91.3978	16.2815	9.63719	95.092	0.538397	0.14881	0.0767936	0.841593		160	832
	EIKEN	R=5 / Pg1=115	885	0.84689		156	845	4	40		90.9091	15.5844	4.51977	97.5	0.532468	0.141677	0.0649351	0.849037		156	849	4	36		90	15.5224	4.0678	97.5	0.527612	0.139701	0.0552239	0.850674		152	800	8	85		91.3978	15.9664	9.60452	95	0.536821	0.145929	0.0736424	0.844727		157	835
	EIKEN	R=5 / Pg1=120	888	0.849761		153	848	4	40		90.9091	15.2847	4.5045	97.4522	0.530969	0.138952	0.0619381	0.852017		153	852	4	36		90	15.2239	4.05405	97.4522	0.526119	0.137015	0.0522388	0.853639		150	802	7	86		92.4731	15.7563	9.68468	95.5414	0.541147	0.145703	0.0822942	0.845793		154	838
	EIKEN	R=5 / Pg1=125	891	0.852632		150	851	4	40		90.9091	14.985	4.48934	97.4026	0.529471	0.136227	0.0589411	0.854997		150	855	4	36		90	14.9254	4.0404	97.4026	0.524627	0.134328	0.0492537	0.856603		147	805	7	86		92.4731	15.4412	9.65208	95.4545	0.539571	0.142789	0.0791429	0.848932		151	841
	EIKEN	R=5 / Pg1=130	892	0.853589		149	852	4	40		90.9091	14.8851	4.4843	97.3856	0.528971	0.135319	0.0579421	0.85599		149	856	4	36		90	14.8259	4.03587	97.3856	0.524129	0.133433	0.0482587	0.857592		146	806	7	86		92.4731	15.3361	9.64126	95.4248	0.539046	0.141818	0.0780925	0.849978		150	842
	EIKEN	R=5 / Pg1=135	894	0.855502		147	854	4	40		90.9091	14.6853	4.47427	97.351	0.527972	0.133503	0.0559441	0.857977		147	858	4	36		90	14.6269	4.02685	97.351	0.523134	0.131642	0.0462687	0.859568		144	808	7	86		92.4731	15.1261	9.61969	95.3642	0.537996	0.139875	0.0759917	0.85207		148	844
	EIKEN	R=5 / Pg1=140	894	0.855502		147	854	4	40		90.9091	14.6853	4.47427	97.351	0.527972	0.133503	0.0559441	0.857977		147	858	4	36		90	14.6269	4.02685	97.351	0.523134	0.131642	0.0462687	0.859568		144	808	7	86		92.4731	15.1261	9.61969	95.3642	0.537996	0.139875	0.0759917	0.85207		148	844
	EIKEN	R=5 / Pg1=145	894	0.855502		147	854	4	40		90.9091	14.6853	4.47427	97.351	0.527972	0.133503	0.0559441	0.857977		147	858	4	36		90	14.6269	4.02685	97.351	0.523134	0.131642	0.0462687	0.859568		144	808	7	86		92.4731	15.1261	9.61969	95.3642	0.537996	0.139875	0.0759917	0.85207		148	844
	EIKEN	R=5 / Pg1=150	894	0.855502		147	854	4	40		90.9091	14.6853	4.47427	97.351	0.527972	0.133503	0.0559441	0.857977		147	858	4	36		90	14.6269	4.02685	97.351	0.523134	0.131642	0.0462687	0.859568		144	808	7	86		92.4731	15.1261	9.61969	95.3642	0.537996	0.139875	0.0759917	0.85207		148	844
	EIKEN	R=5.5 / Pg1=5	12	0.0114833		993	8	40	4		9.09091	99.2008	33.3333	96.1278	0.541459	0.0901825	0.0829171	0.909126		996	9	37	3		7.5	99.1045	25	96.4182	0.533022	0.0743284	0.0660448	0.925043		944	8	89	4		4.30108	99.1597	33.3333	91.3843	0.517304	0.0426493	0.0346074	0.957026		987	5
	EIKEN	R=5.5 / Pg1=10	44	0.0421053		966	35	35	9		20.4545	96.5035	20.4545	96.5035	0.58479	0.197394	0.16958	0.796223		969	36	32	8		20	96.4179	18.1818	96.8032	0.58209	0.192836	0.164179	0.800802		919	33	82	11		11.828	96.5336	25	91.8082	0.541808	0.11418	0.0836157	0.882402		967	25
	EIKEN	R=5.5 / Pg1=15	61	0.0583732		952	49	32	12		27.2727	95.1049	19.6721	96.748	0.611888	0.259377	0.223776	0.728918		955	50	29	11		27.5	95.0249	18.0328	97.0528	0.612624	0.261318	0.225249	0.726705		905	47	79	14		15.0538	95.063	22.9508	91.9715	0.550584	0.143106	0.101168	0.850896		953	39
	EIKEN	R=5.5 / Pg1=20	90	0.0861244		926	75	29	15		34.0909	92.5075	16.6667	96.9634	0.632992	0.315366	0.265984	0.663336		929	76	26	14		35	92.4378	15.5556	97.2775	0.637189	0.323532	0.274378	0.654384		881	71	74	19		20.4301	92.542	21.1111	92.2513	0.564861	0.189064	0.129721	0.799186		928	64
	EIKEN	R=5.5 / Pg1=25	150	0.143541		868	133	27	17		38.6364	86.7133	11.3333	96.9832	0.626748	0.335029	0.253497	0.627856		871	134	24	16		40	86.6667	10.6667	97.3184	0.633333	0.346667	0.266667	0.614636		826	126	69	24		25.8065	86.7647	16	92.2905	0.562856	0.223909	0.125712	0.753648		869	123
	EIKEN	R=5.5 / Pg1=30	216	0.206699		803	198	26	18		40.9091	80.2198	8.33333	96.8637	0.605644	0.328172	0.211289	0.623137		806	199	23	17		42.5	80.199	7.87037	97.2256	0.613495	0.340846	0.22699	0.608139		763	189	66	27		29.0323	80.1471	12.5	92.0386	0.545897	0.232685	0.0917932	0.736923		804	188
	EIKEN	R=5.5 / Pg1=35	312	0.298565		713	288	20	24		54.5455	71.2288	7.69231	97.2715	0.628871	0.388521	0.257742	0.53795		716	289	17	23		57.5	71.2438	7.37179	97.6808	0.643719	0.409652	0.287438	0.513144		679	273	54	39		41.9355	71.3235	12.5	92.633	0.566295	0.299099	0.13259	0.647598		712	280
	EIKEN	R=5.5 / Pg1=40	420	0.401914		607	394	18	26		59.0909	60.6394	6.19048	97.12	0.598651	0.358323	0.197303	0.567698		610	395	15	25		62.5	60.6965	5.95238	97.6	0.615983	0.379353	0.231965	0.543232		577	375	48	45		48.3871	60.6092	10.7143	92.32	0.544982	0.293271	0.0899634	0.649271		607	385
	EIKEN	R=5.5 / Pg1=45	511	0.488995		517	484	17	27		61.3636	51.6484	5.28376	96.8165	0.56506	0.316933	0.13012	0.618922		520	485	14	26		65	51.7413	5.08806	97.3783	0.583706	0.336318	0.167413	0.596146		494	458	40	53		56.9892	51.8908	10.3718	92.5094	0.5444	0.295722	0.0888	0.645323		517	475
	EIKEN	R=5.5 / Pg1=50	600	0.574163		432	569	13	31		70.4545	43.1568	5.16667	97.0787	0.568057	0.30406	0.136114	0.640631		433	572	12	28		70	43.0846	4.66667	97.3034	0.565423	0.301592	0.130846	0.643379		413	539	32	61		65.5914	43.3824	10.1667	92.809	0.544869	0.284551	0.0897375	0.662534		433	559
	EIKEN	R=5.5 / Pg1=55	685	0.655502		348	653	12	32		72.7273	34.7652	4.67153	96.6667	0.537463	0.252838	0.0749251	0.707063		348	657	12	28		70	34.6269	4.08759	96.6667	0.523134	0.242388	0.0462687	0.719281		333	619	27	66		70.9677	34.979	9.63504	92.5	0.529734	0.248238	0.0594673	0.712082		350	642
	EIKEN	R=5.5 / Pg1=60	753	0.720574		283	718	9	35		79.5455	28.2717	4.64807	96.9178	0.539086	0.224889	0.0781718	0.745878		283	722	9	31		77.5	28.1592	4.11687	96.9178	0.528296	0.218234	0.056592	0.752818		269	683	23	70		75.2688	28.2563	9.29615	92.1233	0.517626	0.212682	0.0352512	0.758867		284	708
	EIKEN	R=5.5 / Pg1=65	799	0.764593		240	761	6	38		86.3636	23.976	4.75594	97.561	0.551698	0.207066	0.103397	0.772373		240	765	6	34		85	23.8806	4.25532	97.561	0.544403	0.202985	0.088806	0.775833		227	725	19	74		79.5699	23.8445	9.26158	92.2764	0.517072	0.189731	0.0341443	0.788482		239	753
	EIKEN	R=5.5 / Pg1=70	850	0.813397		192	809	3	41		93.1818	19.1808	4.82353	98.4615	0.561813	0.17873	0.123626	0.811063		192	813	3	37		92.5	19.1045	4.35294	98.4615	0.558022	0.176716	0.116045	0.812424		183	769	12	81		87.0968	19.2227	9.52941	93.8462	0.531597	0.167423	0.0631946	0.818014		190	802
	EIKEN	R=5.5 / Pg1=75	872	0.83445		170	831	3	41		93.1818	16.983	4.70183	98.2659	0.550824	0.158251	0.101648	0.832965		170	835	3	37		92.5	16.9154	4.24312	98.2659	0.547077	0.156468	0.0941542	0.834224		161	791	12	81		87.0968	16.9118	9.28899	93.0636	0.520043	0.147296	0.0400854	0.840842		168	824
	EIKEN	R=5.5 / Pg1=80	892	0.853589		150	851	3	41		93.1818	14.985	4.59641	98.0392	0.540834	0.139633	0.0816683	0.85288		150	855	3	37		92.5	14.9254	4.14798	98.0392	0.537127	0.13806	0.0742537	0.854046		141	811	12	81		87.0968	14.8109	9.08072	92.1569	0.509539	0.128998	0.019077	0.861607		149	843
	EIKEN	R=5.5 / Pg1=85	906	0.866986		136	865	3	41		93.1818	13.5864	4.52539	97.8417	0.533841	0.126601	0.0676823	0.866822		136	869	3	37		92.5	13.5323	4.08389	97.8417	0.530162	0.125174	0.0603234	0.867923		128	824	11	82		88.172	13.4454	9.05077	92.0863	0.508087	0.118551	0.0161742	0.87359		135	857
	EIKEN	R=5.5 / Pg1=90	912	0.872727		130	871	3	41		93.1818	12.987	4.49561	97.7444	0.530844	0.121015	0.0616883	0.872797		130	875	3	37		92.5	12.9353	4.05702	97.7444	0.527177	0.119652	0.0543532	0.873871		123	829	10	83		89.2473	12.9202	9.10088	92.4812	0.510837	0.115309	0.0216748	0.877412		129	863
	EIKEN	R=5.5 / Pg1=95	924	0.884211		118	883	3	41		93.1818	11.7882	4.43723	97.5207	0.52485	0.109845	0.0497003	0.884749		118	887	3	37		92.5	11.7413	4.00433	97.5207	0.521206	0.108607	0.0424129	0.885768		112	840	9	84		90.3226	11.7647	9.09091	92.562	0.510436	0.106262	0.0208729	0.887644		117	875
	EIKEN	R=5.5 / Pg1=100	927	0.887081		115	886	3	41		93.1818	11.4885	4.42287	97.4576	0.523352	0.107052	0.0467033	0.887737		115	890	3	37		92.5	11.4428	3.99137	97.4576	0.519714	0.105846	0.0394279	0.888742		109	843	9	84		90.3226	11.4496	9.06149	92.3729	0.508861	0.103416	0.0177216	0.890777		114	878
	EIKEN	R=5.5 / Pg1=105	932	0.891866		111	890	2	42		95.4545	11.0889	4.50644	98.2301	0.532717	0.105849	0.0654346	0.890272		111	894	2	38		95	11.0448	4.07725	98.2301	0.530224	0.104925	0.0604478	0.890956		106	846	7	86		92.4731	11.1345	9.22747	93.8053	0.518038	0.102964	0.0360757	0.891837		110	882
	EIKEN	R=5.5 / Pg1=110	938	0.897608		105	896	2	42		95.4545	10.4895	4.47761	98.1308	0.52972	0.100127	0.0594406	0.896258		105	900	2	38		95	10.4478	4.05117	98.1308	0.527239	0.0992537	0.0544776	0.896917		101	851	6	87		93.5484	10.6092	9.27505	94.3925	0.520788	0.0992478	0.0415763	0.896233		104	888
	EIKEN	R=5.5 / Pg1=115	941	0.900478		102	899	2	42		95.4545	10.1898	4.46334	98.0769	0.528222	0.0972664	0.0564436	0.899251		102	903	2	38		95	10.1493	4.03826	98.0769	0.525746	0.0964179	0.0514925	0.899898		98	854	6	87		93.5484	10.2941	9.24548	94.2308	0.519213	0.0962998	0.038425	0.899376		101	891
	EIKEN	R=5.5 / Pg1=120	944	0.903349		99	902	2	42		95.4545	9.89011	4.44915	98.0198	0.526723	0.0944056	0.0534466	0.902245		99	906	2	38		95	9.85075	4.02542	98.0198	0.524254	0.0935821	0.0485075	0.902878		96	856	5	88		94.6237	10.084	9.32203	95.0495	0.523538	0.0954188	0.0470769	0.900766		98	894
	EIKEN	R=5.5 / Pg1=125	948	0.907177		95	906	2	42		95.4545	9.49051	4.43038	97.9381	0.524725	0.0905912	0.0494505	0.906236		95	910	2	38		95	9.45274	4.00844	97.9381	0.522264	0.089801	0.0445274	0.906852		92	860	5	88		94.6237	9.66387	9.2827	94.8454	0.521438	0.091443	0.0428752	0.90496		94	898
	EIKEN	R=5.5 / Pg1=130	949	0.908134		94	907	2	42		95.4545	9.39061	4.42571	97.9167	0.524226	0.0896376	0.0484515	0.907233		94	911	2	38		95	9.35323	4.00421	97.9167	0.521766	0.0888557	0.0435323	0.907846		91	861	5	88		94.6237	9.55882	9.27292	94.7917	0.520912	0.0904491	0.0418248	0.906008		93	899
	EIKEN	R=5.5 / Pg1=135	951	0.910048		92	909	2	42		95.4545	9.19081	4.4164	97.8723	0.523227	0.0877305	0.0464535	0.909229		92	913	2	38		95	9.15423	3.99579	97.8723	0.520771	0.0869652	0.0415423	0.909833		89	863	5	88		94.6237	9.34874	9.25342	94.6809	0.519862	0.0884612	0.039724	0.908106		91	901
	EIKEN	R=5.5 / Pg1=140	951	0.910048		92	909	2	42		95.4545	9.19081	4.4164	97.8723	0.523227	0.0877305	0.0464535	0.909229		92	913	2	38		95	9.15423	3.99579	97.8723	0.520771	0.0869652	0.0415423	0.909833		89	863	5	88		94.6237	9.34874	9.25342	94.6809	0.519862	0.0884612	0.039724	0.908106		91	901
	EIKEN	R=5.5 / Pg1=145	951	0.910048		92	909	2	42		95.4545	9.19081	4.4164	97.8723	0.523227	0.0877305	0.0464535	0.909229		92	913	2	38		95	9.15423	3.99579	97.8723	0.520771	0.0869652	0.0415423	0.909833		89	863	5	88		94.6237	9.34874	9.25342	94.6809	0.519862	0.0884612	0.039724	0.908106		91	901
	EIKEN	R=5.5 / Pg1=150	951	0.910048		92	909	2	42		95.4545	9.19081	4.4164	97.8723	0.523227	0.0877305	0.0464535	0.909229		92	913	2	38		95	9.15423	3.99579	97.8723	0.520771	0.0869652	0.0415423	0.909833		89	863	5	88		94.6237	9.34874	9.25342	94.6809	0.519862	0.0884612	0.039724	0.908106		91	901
	EIKEN	R=6 / Pg1=5	12	0.0114833		993	8	40	4		9.09091	99.2008	33.3333	96.1278	0.541459	0.0901825	0.0829171	0.909126		996	9	37	3		7.5	99.1045	25	96.4182	0.533022	0.0743284	0.0660448	0.925043		944	8	89	4		4.30108	99.1597	33.3333	91.3843	0.517304	0.0426493	0.0346074	0.957026		987	5
	EIKEN	R=6 / Pg1=10	44	0.0421053		966	35	35	9		20.4545	96.5035	20.4545	96.5035	0.58479	0.197394	0.16958	0.796223		969	36	32	8		20	96.4179	18.1818	96.8032	0.58209	0.192836	0.164179	0.800802		919	33	82	11		11.828	96.5336	25	91.8082	0.541808	0.11418	0.0836157	0.882402		967	25
	EIKEN	R=6 / Pg1=15	61	0.0583732		952	49	32	12		27.2727	95.1049	19.6721	96.748	0.611888	0.259377	0.223776	0.728918		955	50	29	11		27.5	95.0249	18.0328	97.0528	0.612624	0.261318	0.225249	0.726705		905	47	79	14		15.0538	95.063	22.9508	91.9715	0.550584	0.143106	0.101168	0.850896		953	39
	EIKEN	R=6 / Pg1=20	90	0.0861244		926	75	29	15		34.0909	92.5075	16.6667	96.9634	0.632992	0.315366	0.265984	0.663336		929	76	26	14		35	92.4378	15.5556	97.2775	0.637189	0.323532	0.274378	0.654384		881	71	74	19		20.4301	92.542	21.1111	92.2513	0.564861	0.189064	0.129721	0.799186		928	64
	EIKEN	R=6 / Pg1=25	150	0.143541		868	133	27	17		38.6364	86.7133	11.3333	96.9832	0.626748	0.335029	0.253497	0.627856		871	134	24	16		40	86.6667	10.6667	97.3184	0.633333	0.346667	0.266667	0.614636		826	126	69	24		25.8065	86.7647	16	92.2905	0.562856	0.223909	0.125712	0.753648		869	123
	EIKEN	R=6 / Pg1=30	218	0.208612		801	200	26	18		40.9091	80.02	8.25688	96.8561	0.604645	0.327354	0.209291	0.623774		804	201	23	17		42.5	80	7.79817	97.2189	0.6125	0.34	0.225	0.60879		761	191	66	27		29.0323	79.937	12.3853	92.0193	0.544846	0.232075	0.0896923	0.737492		803	189
	EIKEN	R=6 / Pg1=35	317	0.303349		708	293	20	24		54.5455	70.7293	7.57098	97.2527	0.626374	0.385796	0.252747	0.540638		711	294	17	23		57.5	70.7463	7.25552	97.6648	0.641231	0.406791	0.282463	0.515949		674	278	54	39		41.9355	70.7983	12.3028	92.5824	0.563669	0.296896	0.127338	0.64994		708	284
	EIKEN	R=6 / Pg1=40	431	0.41244		596	405	18	26		59.0909	59.5405	6.03248	97.0684	0.593157	0.35183	0.186314	0.575372		599	406	15	25		62.5	59.602	5.80046	97.557	0.61051	0.372512	0.22102	0.551203		566	386	48	45		48.3871	59.4538	10.4408	92.1824	0.539204	0.28768	0.0784088	0.656345		597	395
	EIKEN	R=6 / Pg1=45	529	0.50622		499	502	17	27		61.3636	49.8501	5.10397	96.7054	0.556069	0.305899	0.112138	0.63307		502	503	14	26		65	49.9502	4.91493	97.2868	0.574751	0.324677	0.149502	0.610735		476	476	40	53		56.9892	50	10.0189	92.2481	0.534946	0.284946	0.0698925	0.65954		500	492
	EIKEN	R=6 / Pg1=50	621	0.594258		411	590	13	31		70.4545	41.0589	4.99195	96.934	0.557567	0.289279	0.115135	0.659316		412	593	12	28		70	40.995	4.50886	97.1698	0.554975	0.286965	0.10995	0.661936		392	560	32	61		65.5914	41.1765	9.82287	92.4528	0.533839	0.270082	0.0676787	0.681481		413	579
	EIKEN	R=6 / Pg1=55	709	0.678469		324	677	12	32		72.7273	32.3676	4.5134	96.4286	0.525475	0.235401	0.0509491	0.729242		324	681	12	28		70	32.2388	3.94922	96.4286	0.511194	0.225672	0.0223881	0.741052		309	643	27	66		70.9677	32.458	9.30889	91.9643	0.517129	0.230347	0.0342573	0.735173		327	665
	EIKEN	R=6 / Pg1=60	778	0.744498		258	743	9	35		79.5455	25.7742	4.49871	96.6292	0.526598	0.205022	0.0531968	0.769926		258	747	9	31		77.5	25.6716	3.98458	96.6292	0.515858	0.198955	0.0317164	0.776592		244	708	23	70		75.2688	25.6303	8.99743	91.3858	0.504495	0.192916	0.00899069	0.78374		260	732
	EIKEN	R=6 / Pg1=65	825	0.789474		214	787	6	38		86.3636	21.3786	4.60606	97.2727	0.538711	0.184634	0.0774226	0.797952		214	791	6	34		85	21.2935	4.12121	97.2727	0.531468	0.180995	0.0629353	0.801231		201	751	19	74		79.5699	21.1134	8.9697	91.3636	0.503417	0.167999	0.00683338	0.814891		214	778
	EIKEN	R=6 / Pg1=70	879	0.841148		163	838	3	41		93.1818	16.2837	4.66439	98.1928	0.547328	0.151735	0.0946553	0.839935		163	842	3	37		92.5	16.2189	4.20933	98.1928	0.543595	0.150025	0.0871891	0.841161		154	798	12	81		87.0968	16.1765	9.21502	92.7711	0.516366	0.140892	0.0327324	0.848108		162	830
	EIKEN	R=6 / Pg1=75	901	0.862201		141	860	3	41		93.1818	14.0859	4.5505	97.9167	0.536339	0.131255	0.0726773	0.861842		141	864	3	37		92.5	14.0299	4.10655	97.9167	0.532649	0.129776	0.0652985	0.862967		132	820	12	81		87.0968	13.8655	8.99001	91.6667	0.504812	0.120764	0.0096232	0.870956		140	852
	EIKEN	R=6 / Pg1=80	922	0.882297		120	881	3	41		93.1818	11.988	4.44685	97.561	0.525849	0.111706	0.0516983	0.882757		120	885	3	37		92.5	11.9403	4.01302	97.561	0.522202	0.110448	0.044403	0.883785		111	841	12	81		87.0968	11.6597	8.78525	90.2439	0.493782	0.101552	-0.0124356	0.892777		120	872
	EIKEN	R=6 / Pg1=85	936	0.895694		106	895	3	41		93.1818	10.5894	4.38034	97.2477	0.518856	0.0986741	0.0377123	0.896702		106	899	3	37		92.5	10.5473	3.95299	97.2477	0.515236	0.0975622	0.0304726	0.897666		98	854	11	82		88.172	10.2941	8.76068	89.9083	0.492331	0.0907653	-0.0153384	0.904823		106	886
	EIKEN	R=6 / Pg1=90	942	0.901435		100	901	3	41		93.1818	9.99001	4.35244	97.0874	0.515859	0.0930887	0.0317183	0.902679		100	905	3	37		92.5	9.95025	3.92781	97.0874	0.512251	0.0920398	0.0245025	0.903615		93	859	10	83		89.2473	9.76891	8.81104	90.2913	0.495081	0.0871849	-0.00983781	0.908695		100	892
	EIKEN	R=6 / Pg1=95	954	0.912919		88	913	3	41		93.1818	8.79121	4.29769	96.7033	0.509865	0.0819181	0.0197303	0.914633		88	917	3	37		92.5	8.75622	3.87841	96.7033	0.506281	0.080995	0.0125622	0.915515		82	870	9	84		90.3226	8.61345	8.80503	90.1099	0.49468	0.0777989	-0.0106397	0.918975		88	904
	EIKEN	R=6 / Pg1=100	957	0.915789		85	916	3	41		93.1818	8.49151	4.28422	96.5909	0.508367	0.0791254	0.0167333	0.917621		85	920	3	37		92.5	8.45771	3.86625	96.5909	0.504789	0.0782338	0.00957711	0.91849		79	873	9	84		90.3226	8.29832	8.77743	89.7727	0.493105	0.0749526	-0.013791	0.922109		85	907
	EIKEN	R=6 / Pg1=105	962	0.920574		81	920	2	42		95.4545	8.09191	4.3659	97.5904	0.517732	0.0772409	0.0354645	0.920204		81	924	2	38		95	8.0597	3.9501	97.5904	0.515299	0.0765672	0.030597	0.920762		76	876	7	86		92.4731	7.98319	8.93971	91.5663	0.502282	0.0738231	0.00456312	0.923241		81	911
	EIKEN	R=6 / Pg1=110	968	0.926316		75	926	2	42		95.4545	7.49251	4.33884	97.4026	0.514735	0.0715194	0.0294705	0.926191		75	930	2	38		95	7.46269	3.92562	97.4026	0.512313	0.0708955	0.0246269	0.926723		71	881	6	87		93.5484	7.45798	8.9876	92.2078	0.505032	0.0697682	0.0100637	0.927666		75	917
	EIKEN	R=6 / Pg1=115	971	0.929187		72	929	2	42		95.4545	7.19281	4.32544	97.2973	0.513237	0.0686586	0.0264735	0.929184		72	933	2	38		95	7.16418	3.91349	97.2973	0.510821	0.0680597	0.0216418	0.929704		68	884	6	87		93.5484	7.14286	8.95984	91.8919	0.503456	0.0668203	0.00691244	0.93081		72	920
	EIKEN	R=6 / Pg1=120	975	0.933014		68	933	2	42		95.4545	6.79321	4.30769	97.1429	0.511239	0.0648442	0.0224775	0.933176		68	937	2	38		95	6.76617	3.89744	97.1429	0.508831	0.0642786	0.0176617	0.933678		65	887	5	88		94.6237	6.82773	9.02564	92.8571	0.507257	0.0646065	0.0145139	0.933273		68	924
	EIKEN	R=6 / Pg1=125	979	0.936842		64	937	2	42		95.4545	6.39361	4.29009	96.9697	0.509241	0.0610299	0.0184815	0.937167		64	941	2	38		95	6.36816	3.88151	96.9697	0.506841	0.0604975	0.0136816	0.937652		61	891	5	88		94.6237	6.40756	8.98876	92.4242	0.505156	0.0606307	0.0103122	0.937467		64	928
	EIKEN	R=6 / Pg1=130	980	0.937799		63	938	2	42		95.4545	6.29371	4.28571	96.9231	0.508741	0.0600763	0.0174825	0.938165		63	942	2	38		95	6.26866	3.87755	96.9231	0.506343	0.0595522	0.0126866	0.938646		60	892	5	88		94.6237	6.30252	8.97959	92.3077	0.504631	0.0596368	0.00926177	0.938516		63	929
	EIKEN	R=6 / Pg1=135	982	0.939713		61	940	2	42		95.4545	6.09391	4.27699	96.8254	0.507742	0.0581691	0.0154845	0.94016		61	944	2	38		95	6.06965	3.86965	96.8254	0.505348	0.0576617	0.0106965	0.940633		58	894	5	88		94.6237	6.09244	8.9613	92.0635	0.50358	0.0576489	0.00716093	0.940613		61	931
	EIKEN	R=6 / Pg1=140	983	0.94067		60	941	2	42		95.4545	5.99401	4.27263	96.7742	0.507243	0.0572155	0.0144855	0.941158		60	945	2	38		95	5.97015	3.86572	96.7742	0.504851	0.0567164	0.00970149	0.941627		57	895	5	88		94.6237	5.98739	8.95219	91.9355	0.503055	0.0566549	0.00611051	0.941662		60	932
	EIKEN	R=6 / Pg1=145	983	0.94067		60	941	2	42		95.4545	5.99401	4.27263	96.7742	0.507243	0.0572155	0.0144855	0.941158		60	945	2	38		95	5.97015	3.86572	96.7742	0.504851	0.0567164	0.00970149	0.941627		57	895	5	88		94.6237	5.98739	8.95219	91.9355	0.503055	0.0566549	0.00611051	0.941662		60	932
	EIKEN	R=6 / Pg1=150	983	0.94067		60	941	2	42		95.4545	5.99401	4.27263	96.7742	0.507243	0.0572155	0.0144855	0.941158		60	945	2	38		95	5.97015	3.86572	96.7742	0.504851	0.0567164	0.00970149	0.941627		57	895	5	88		94.6237	5.98739	8.95219	91.9355	0.503055	0.0566549	0.00611051	0.941662		60	932
	EIKEN	R=6.5 / Pg1=5	12	0.0114833		993	8	40	4		9.09091	99.2008	33.3333	96.1278	0.541459	0.0901825	0.0829171	0.909126		996	9	37	3		7.5	99.1045	25	96.4182	0.533022	0.0743284	0.0660448	0.925043		944	8	89	4		4.30108	99.1597	33.3333	91.3843	0.517304	0.0426493	0.0346074	0.957026		987	5
	EIKEN	R=6.5 / Pg1=10	44	0.0421053		966	35	35	9		20.4545	96.5035	20.4545	96.5035	0.58479	0.197394	0.16958	0.796223		969	36	32	8		20	96.4179	18.1818	96.8032	0.58209	0.192836	0.164179	0.800802		919	33	82	11		11.828	96.5336	25	91.8082	0.541808	0.11418	0.0836157	0.882402		967	25
	EIKEN	R=6.5 / Pg1=15	61	0.0583732		952	49	32	12		27.2727	95.1049	19.6721	96.748	0.611888	0.259377	0.223776	0.728918		955	50	29	11		27.5	95.0249	18.0328	97.0528	0.612624	0.261318	0.225249	0.726705		905	47	79	14		15.0538	95.063	22.9508	91.9715	0.550584	0.143106	0.101168	0.850896		953	39
	EIKEN	R=6.5 / Pg1=20	90	0.0861244		926	75	29	15		34.0909	92.5075	16.6667	96.9634	0.632992	0.315366	0.265984	0.663336		929	76	26	14		35	92.4378	15.5556	97.2775	0.637189	0.323532	0.274378	0.654384		881	71	74	19		20.4301	92.542	21.1111	92.2513	0.564861	0.189064	0.129721	0.799186		928	64
	EIKEN	R=6.5 / Pg1=25	150	0.143541		868	133	27	17		38.6364	86.7133	11.3333	96.9832	0.626748	0.335029	0.253497	0.627856		871	134	24	16		40	86.6667	10.6667	97.3184	0.633333	0.346667	0.266667	0.614636		826	126	69	24		25.8065	86.7647	16	92.2905	0.562856	0.223909	0.125712	0.753648		869	123
	EIKEN	R=6.5 / Pg1=30	220	0.210526		799	202	26	18		40.9091	79.8202	8.18182	96.8485	0.603646	0.326537	0.207293	0.624417		802	203	23	17		42.5	79.801	7.72727	97.2121	0.611505	0.339154	0.22301	0.609446		759	193	66	27		29.0323	79.7269	12.2727	92	0.543796	0.231465	0.0875915	0.738066		801	191
	EIKEN	R=6.5 / Pg1=35	321	0.307177		704	297	20	24		54.5455	70.3297	7.47664	97.2376	0.624376	0.383616	0.248751	0.542812		707	298	17	23		57.5	70.3483	7.16511	97.6519	0.639241	0.404502	0.278483	0.518216		671	281	53	40		43.0108	70.4832	12.4611	92.6796	0.56747	0.303154	0.134939	0.641796		704	288
	EIKEN	R=6.5 / Pg1=40	439	0.420096		588	413	18	26		59.0909	58.7413	5.92255	97.0297	0.589161	0.347107	0.178322	0.58102		591	414	15	25		62.5	58.806	5.69476	97.5248	0.60653	0.367537	0.21306	0.557064		559	393	47	46		49.4624	58.7185	10.4784	92.2442	0.540904	0.290436	0.0818085	0.65255		589	403
	EIKEN	R=6.5 / Pg1=45	538	0.514833		490	511	17	27		61.3636	48.951	5.01859	96.6469	0.551573	0.300381	0.103147	0.640216		493	512	14	26		65	49.0547	4.83271	97.2387	0.570274	0.318856	0.140547	0.618096		468	484	39	54		58.0645	49.1597	10.0372	92.3077	0.536121	0.285443	0.0722418	0.659039		491	501
	EIKEN	R=6.5 / Pg1=50	633	0.605742		399	602	13	31		70.4545	39.8601	4.89731	96.8447	0.551573	0.280833	0.103147	0.670055		400	605	12	28		70	39.801	4.42338	97.0874	0.549005	0.278607	0.09801	0.672601		382	570	30	63		67.7419	40.1261	9.95261	92.7184	0.53934	0.271822	0.0786799	0.680108		401	591
	EIKEN	R=6.5 / Pg1=55	724	0.692823		309	692	12	32		72.7273	30.8691	4.41989	96.2617	0.517982	0.224503	0.035964	0.743161		309	696	12	28		70	30.7463	3.8674	96.2617	0.503731	0.215224	0.00746269	0.754724		296	656	25	68		73.1183	31.0924	9.39227	92.2118	0.521054	0.227343	0.0421072	0.739654		312	680
	EIKEN	R=6.5 / Pg1=60	796	0.761722		240	761	9	35		79.5455	23.976	4.39698	96.3855	0.517607	0.190718	0.0352148	0.787276		240	765	9	31		77.5	23.8806	3.89447	96.3855	0.506903	0.185075	0.013806	0.793751		228	724	21	72		77.4194	23.9496	9.04523	91.5663	0.506845	0.185416	0.0136893	0.793319		242	750
	EIKEN	R=6.5 / Pg1=65	844	0.807656		195	806	6	38		86.3636	19.4805	4.50237	97.0149	0.529221	0.168241	0.0584416	0.81666		195	810	6	34		85	19.403	4.02844	97.0149	0.522015	0.164925	0.0440299	0.81981		184	768	17	76		81.7204	19.3277	9.00474	91.5423	0.505241	0.157947	0.0104816	0.827173		195	797
	EIKEN	R=6.5 / Pg1=70	900	0.861244		143	858	2	42		95.4545	14.2857	4.66667	98.6207	0.548701	0.136364	0.0974026	0.858347		143	862	2	38		95	14.2289	4.22222	98.6207	0.546144	0.135174	0.0922886	0.859168		137	815	8	85		91.3978	14.3908	9.44444	94.4828	0.528943	0.131528	0.0578861	0.860403		142	850
	EIKEN	R=6.5 / Pg1=75	922	0.882297		121	880	2	42		95.4545	12.0879	4.55531	98.374	0.537712	0.115385	0.0754246	0.880295		121	884	2	38		95	12.0398	4.12148	98.374	0.535199	0.114378	0.070398	0.881022		115	837	8	85		91.3978	12.0798	9.21909	93.4959	0.517388	0.110407	0.0347768	0.8834		120	872
	EIKEN	R=6.5 / Pg1=80	943	0.902392		100	901	2	42		95.4545	9.99001	4.45387	98.0392	0.527223	0.0953592	0.0544456	0.901247		100	905	2	38		95	9.95025	4.02969	98.0392	0.524751	0.0945274	0.0495025	0.901885		94	858	8	85		91.3978	9.87395	9.01379	92.1569	0.506359	0.0902458	0.012718	0.905356		100	892
	EIKEN	R=6.5 / Pg1=85	957	0.915789		86	915	2	42		95.4545	8.59141	4.38871	97.7273	0.52023	0.0820089	0.0404595	0.915215		86	919	2	38		95	8.55721	3.97074	97.7273	0.517786	0.0812935	0.0355721	0.915794		81	871	7	86		92.4731	8.5084	8.98642	92.0455	0.504908	0.0786799	0.00981522	0.918007		86	906
	EIKEN	R=6.5 / Pg1=90	963	0.921531		80	921	2	42		95.4545	7.99201	4.36137	97.561	0.517233	0.0762873	0.0344655	0.921202		80	925	2	38		95	7.9602	3.946	97.561	0.514801	0.0756219	0.029602	0.921755		76	876	6	87		93.5484	7.98319	9.03427	92.6829	0.507658	0.0746815	0.0153158	0.922427		80	912
	EIKEN	R=6.5 / Pg1=95	975	0.933014		68	933	2	42		95.4545	6.79321	4.30769	97.1429	0.511239	0.0648442	0.0224775	0.933176		68	937	2	38		95	6.76617	3.89744	97.1429	0.508831	0.0642786	0.0176617	0.933678		65	887	5	88		94.6237	6.82773	9.02564	92.8571	0.507257	0.0646065	0.0145139	0.933273		68	924
	EIKEN	R=6.5 / Pg1=100	979	0.936842		64	937	2	42		95.4545	6.39361	4.29009	96.9697	0.509241	0.0610299	0.0184815	0.937167		64	941	2	38		95	6.36816	3.88151	96.9697	0.506841	0.0604975	0.0136816	0.937652		61	891	5	88		94.6237	6.40756	8.98876	92.4242	0.505156	0.0606307	0.0103122	0.937467		64	928
	EIKEN	R=6.5 / Pg1=105	984	0.941627		60	941	1	43		97.7273	5.99401	4.36992	98.3607	0.518606	0.0585778	0.0372128	0.940335		60	945	1	39		97.5	5.97015	3.96341	98.3607	0.517351	0.058209	0.0347015	0.940631		58	894	3	90		96.7742	6.09244	9.14634	95.082	0.514333	0.0589591	0.0286663	0.93963		60	932
	EIKEN	R=6.5 / Pg1=110	990	0.947368		54	947	1	43		97.7273	5.39461	4.34343	98.1818	0.515609	0.05272	0.0312188	0.946327		54	951	1	39		97.5	5.37313	3.93939	98.1818	0.514366	0.0523881	0.0287313	0.946599		53	899	2	91		97.8495	5.56723	9.19192	96.3636	0.517083	0.054475	0.0341669	0.944573		54	938
	EIKEN	R=6.5 / Pg1=115	993	0.950239		51	950	1	43		97.7273	5.09491	4.33031	98.0769	0.514111	0.0497911	0.0282218	0.949323		51	954	1	39		97.5	5.07463	3.92749	98.0769	0.512873	0.0494776	0.0257463	0.949583		50	902	2	91		97.8495	5.2521	9.16415	96.1538	0.515508	0.0513915	0.0310156	0.947723		51	941
	EIKEN	R=6.5 / Pg1=120	997	0.954067		47	954	1	43		97.7273	4.6953	4.31294	97.9167	0.512113	0.0458859	0.0242258	0.953318		47	958	1	39		97.5	4.67662	3.91174	97.9167	0.510883	0.045597	0.0217662	0.953562		47	905	1	92		98.9247	4.93697	9.22768	97.9167	0.519309	0.0488389	0.0386171	0.950691		47	945
	EIKEN	R=6.5 / Pg1=125	1001	0.957895		43	958	1	43		97.7273	4.2957	4.2957	97.7273	0.510115	0.0419807	0.0202298	0.957313		43	962	1	39		97.5	4.27861	3.8961	97.7273	0.508893	0.0417164	0.0177861	0.95754		43	909	1	92		98.9247	4.51681	9.19081	97.7273	0.517208	0.0446824	0.0344154	0.954892		43	949
	EIKEN	R=6.5 / Pg1=130	1002	0.958852		42	959	1	43		97.7273	4.1958	4.29142	97.6744	0.509615	0.0410045	0.0192308	0.958311		42	963	1	39		97.5	4.1791	3.89222	97.6744	0.508396	0.0407463	0.016791	0.958535		42	910	1	92		98.9247	4.41176	9.18164	97.6744	0.516682	0.0436433	0.033365	0.955943		42	950
	EIKEN	R=6.5 / Pg1=135	1004	0.960766		40	961	1	43		97.7273	3.996	4.28287	97.561	0.508616	0.0390519	0.0172328	0.960309		40	965	1	39		97.5	3.9801	3.88446	97.561	0.507401	0.038806	0.014801	0.960524		40	912	1	92		98.9247	4.20168	9.16335	97.561	0.515632	0.041565	0.0312641	0.958044		40	952
	EIKEN	R=6.5 / Pg1=140	1005	0.961722		39	962	1	43		97.7273	3.8961	4.27861	97.5	0.508117	0.0380756	0.0162338	0.961308		39	966	1	39		97.5	3.8806	3.8806	97.5	0.506903	0.0378358	0.013806	0.961519		39	913	1	92		98.9247	4.09664	9.15423	97.5	0.515107	0.0405259	0.0302137	0.959094		39	953
	EIKEN	R=6.5 / Pg1=145	1005	0.961722		39	962	1	43		97.7273	3.8961	4.27861	97.5	0.508117	0.0380756	0.0162338	0.961308		39	966	1	39		97.5	3.8806	3.8806	97.5	0.506903	0.0378358	0.013806	0.961519		39	913	1	92		98.9247	4.09664	9.15423	97.5	0.515107	0.0405259	0.0302137	0.959094		39	953
	EIKEN	R=6.5 / Pg1=150	1006	0.962679		38	963	1	43		97.7273	3.7962	4.27435	97.4359	0.507617	0.0370993	0.0152348	0.962306		38	967	1	39		97.5	3.78109	3.87674	97.4359	0.506405	0.0368657	0.0128109	0.962514		38	914	1	92		98.9247	3.9916	9.14513	97.4359	0.514582	0.0394868	0.0291633	0.960144		38	954
	EIKEN	R=7 / Pg1=5	12	0.0114833		993	8	40	4		9.09091	99.2008	33.3333	96.1278	0.541459	0.0901825	0.0829171	0.909126		996	9	37	3		7.5	99.1045	25	96.4182	0.533022	0.0743284	0.0660448	0.925043		944	8	89	4		4.30108	99.1597	33.3333	91.3843	0.517304	0.0426493	0.0346074	0.957026		987	5
	EIKEN	R=7 / Pg1=10	44	0.0421053		966	35	35	9		20.4545	96.5035	20.4545	96.5035	0.58479	0.197394	0.16958	0.796223		969	36	32	8		20	96.4179	18.1818	96.8032	0.58209	0.192836	0.164179	0.800802		919	33	82	11		11.828	96.5336	25	91.8082	0.541808	0.11418	0.0836157	0.882402		967	25
	EIKEN	R=7 / Pg1=15	61	0.0583732		952	49	32	12		27.2727	95.1049	19.6721	96.748	0.611888	0.259377	0.223776	0.728918		955	50	29	11		27.5	95.0249	18.0328	97.0528	0.612624	0.261318	0.225249	0.726705		905	47	79	14		15.0538	95.063	22.9508	91.9715	0.550584	0.143106	0.101168	0.850896		953	39
	EIKEN	R=7 / Pg1=20	90	0.0861244		926	75	29	15		34.0909	92.5075	16.6667	96.9634	0.632992	0.315366	0.265984	0.663336		929	76	26	14		35	92.4378	15.5556	97.2775	0.637189	0.323532	0.274378	0.654384		881	71	74	19		20.4301	92.542	21.1111	92.2513	0.564861	0.189064	0.129721	0.799186		928	64
	EIKEN	R=7 / Pg1=25	150	0.143541		868	133	27	17		38.6364	86.7133	11.3333	96.9832	0.626748	0.335029	0.253497	0.627856		871	134	24	16		40	86.6667	10.6667	97.3184	0.633333	0.346667	0.266667	0.614636		826	126	69	24		25.8065	86.7647	16	92.2905	0.562856	0.223909	0.125712	0.753648		869	123
	EIKEN	R=7 / Pg1=30	220	0.210526		799	202	26	18		40.9091	79.8202	8.18182	96.8485	0.603646	0.326537	0.207293	0.624417		802	203	23	17		42.5	79.801	7.72727	97.2121	0.611505	0.339154	0.22301	0.609446		759	193	66	27		29.0323	79.7269	12.2727	92	0.543796	0.231465	0.0875915	0.738066		801	191
	EIKEN	R=7 / Pg1=35	323	0.309091		702	299	20	24		54.5455	70.1299	7.43034	97.2299	0.623377	0.382527	0.246753	0.543906		705	300	17	23		57.5	70.1493	7.12074	97.6454	0.638246	0.403358	0.276493	0.519357		669	283	53	40		43.0108	70.2731	12.3839	92.6593	0.566419	0.30225	0.132839	0.642765		702	290
	EIKEN	R=7 / Pg1=40	443	0.423923		584	417	18	26		59.0909	58.3417	5.86907	97.01	0.587163	0.344746	0.174326	0.583864		587	418	15	25		62.5	58.408	5.64334	97.5083	0.60454	0.36505	0.20908	0.560013		555	397	47	46		49.4624	58.2983	10.3837	92.1927	0.538803	0.288357	0.0776068	0.655216		585	407
	EIKEN	R=7 / Pg1=45	543	0.519617		485	516	17	27		61.3636	48.4515	4.97238	96.6135	0.549076	0.297316	0.0981518	0.644206		488	517	14	26		65	48.5572	4.78821	97.2112	0.567786	0.315622	0.135572	0.622203		463	489	39	54		58.0645	48.6345	9.94475	92.2311	0.533495	0.282394	0.0669897	0.663099		486	506
	EIKEN	R=7 / Pg1=50	639	0.611483		393	608	13	31		70.4545	39.2607	4.85133	96.798	0.548576	0.27661	0.0971528	0.67544		394	611	12	28		70	39.204	4.38185	97.0443	0.54602	0.274428	0.0920398	0.67795		376	576	30	63		67.7419	39.4958	9.85915	92.6108	0.536189	0.267552	0.0723773	0.685663		395	597
	EIKEN	R=7 / Pg1=55	730	0.698565		303	698	12	32		72.7273	30.2697	4.38356	96.1905	0.514985	0.220143	0.02997	0.74874		303	702	12	28		70	30.1493	3.83562	96.1905	0.500746	0.211045	0.00149254	0.760206		290	662	25	68		73.1183	30.4622	9.31507	92.0635	0.517902	0.222734	0.0358046	0.745529		306	686
	EIKEN	R=7 / Pg1=60	802	0.767464		234	767	9	35		79.5455	23.3766	4.36409	96.2963	0.51461	0.18595	0.0292208	0.793066		234	771	9	31		77.5	23.2836	3.86534	96.2963	0.503918	0.180448	0.00783582	0.799479		222	730	21	72		77.4194	23.3193	8.97756	91.358	0.503693	0.180537	0.00738683	0.799363		236	756
	EIKEN	R=7 / Pg1=65	851	0.814354		188	813	6	38		86.3636	18.7812	4.46533	96.9072	0.525724	0.162201	0.0514486	0.823556		188	817	6	34		85	18.7065	3.9953	96.9072	0.518532	0.159005	0.0370647	0.826658		177	775	17	76		81.7204	18.5924	8.93067	91.2371	0.501564	0.151938	0.00312867	0.834346		188	804
	EIKEN	R=7 / Pg1=70	910	0.870813		133	868	2	42		95.4545	13.2867	4.61538	98.5185	0.543706	0.126828	0.0874126	0.868323		133	872	2	38		95	13.2338	4.17582	98.5185	0.541169	0.125721	0.0823383	0.869101		127	825	8	85		91.3978	13.3403	9.34066	94.0741	0.523691	0.121928	0.0473819	0.870856		132	860
	EIKEN	R=7 / Pg1=75	932	0.891866		111	890	2	42		95.4545	11.0889	4.50644	98.2301	0.532717	0.105849	0.0654346	0.890272		111	894	2	38		95	11.0448	4.07725	98.2301	0.530224	0.104925	0.0604478	0.890956		105	847	8	85		91.3978	11.0294	9.12017	92.9204	0.512136	0.100806	0.0242726	0.893855		110	882
	EIKEN	R=7 / Pg1=80	953	0.911962		90	911	2	42		95.4545	8.99101	4.40714	97.8261	0.522228	0.0858233	0.0444555	0.911224		90	915	2	38		95	8.95522	3.98741	97.8261	0.519776	0.0850746	0.0395522	0.91182		84	868	8	85		91.3978	8.82353	8.9192	91.3043	0.501107	0.0806452	0.00221379	0.915814		90	902
	EIKEN	R=7 / Pg1=85	968	0.926316		75	926	2	42		95.4545	7.49251	4.33884	97.4026	0.514735	0.0715194	0.0294705	0.926191		75	930	2	38		95	7.46269	3.92562	97.4026	0.512313	0.0708955	0.0246269	0.926723		70	882	7	86		92.4731	7.35294	8.8843	90.9091	0.49913	0.0679949	-0.00173941	0.929523		75	917
	EIKEN	R=7 / Pg1=90	974	0.932057		69	932	2	42		95.4545	6.89311	4.31211	97.1831	0.511738	0.0657978	0.0234765	0.932178		69	936	2	38		95	6.86567	3.90144	97.1831	0.509328	0.0652239	0.0186567	0.932684		65	887	6	87		93.5484	6.82773	8.93224	91.5493	0.501881	0.0638723	0.00376118	0.933954		69	923
	EIKEN	R=7 / Pg1=95	986	0.943541		57	944	2	42		95.4545	5.69431	4.25963	96.6102	0.505744	0.0543547	0.0114885	0.944152		57	948	2	38		95	5.67164	3.85396	96.6102	0.503358	0.0538806	0.00671642	0.944608		54	898	5	88		94.6237	5.67227	8.92495	91.5254	0.50148	0.0536731	0.00295925	0.944808		57	935
	EIKEN	R=7 / Pg1=100	990	0.947368		53	948	2	42		95.4545	5.29471	4.24242	96.3636	0.503746	0.0505404	0.00749251	0.948143		53	952	2	38		95	5.27363	3.83838	96.3636	0.501368	0.0500995	0.00273632	0.948582		50	902	5	88		94.6237	5.2521	8.88889	90.9091	0.499379	0.0496973	-0.00124243	0.949003		53	939
	EIKEN	R=7 / Pg1=105	995	0.952153		49	952	1	43		97.7273	4.8951	4.32161	98	0.513112	0.0478385	0.0262238	0.95132		49	956	1	39		97.5	4.87562	3.9196	98	0.511878	0.0475373	0.0237562	0.951572		47	905	3	90		96.7742	4.93697	9.04523	94	0.508556	0.0477772	0.0171117	0.951177		49	943
	EIKEN	R=7 / Pg1=110	1001	0.957895		43	958	1	43		97.7273	4.2957	4.2957	97.7273	0.510115	0.0419807	0.0202298	0.957313		43	962	1	39		97.5	4.27861	3.8961	97.7273	0.508893	0.0417164	0.0177861	0.95754		42	910	2	91		97.8495	4.41176	9.09091	95.4545	0.511306	0.0431689	0.0226123	0.956124		43	949
	EIKEN	R=7 / Pg1=115	1004	0.960766		40	961	1	43		97.7273	3.996	4.28287	97.561	0.508616	0.0390519	0.0172328	0.960309		40	965	1	39		97.5	3.9801	3.88446	97.561	0.507401	0.038806	0.014801	0.960524		39	913	2	91		97.8495	4.09664	9.06375	95.122	0.509731	0.0400854	0.019461	0.959275		40	952
	EIKEN	R=7 / Pg1=120	1008	0.964593		36	965	1	43		97.7273	3.5964	4.26587	97.2973	0.506618	0.0351467	0.0132368	0.964304		36	969	1	39		97.5	3.58209	3.86905	97.2973	0.50541	0.0349254	0.0108209	0.964503		36	916	1	92		98.9247	3.78151	9.12698	97.2973	0.513531	0.0374085	0.0270624	0.962245		36	956
	EIKEN	R=7 / Pg1=125	1012	0.968421		32	969	1	43		97.7273	3.1968	4.24901	96.9697	0.50462	0.0312415	0.00924076	0.968299		32	973	1	39		97.5	3.18408	3.85375	96.9697	0.50342	0.0310448	0.0068408	0.968482		32	920	1	92		98.9247	3.36134	9.09091	96.9697	0.51143	0.033252	0.0228608	0.966446		32	960
	EIKEN	R=7 / Pg1=130	1013	0.969378		31	970	1	43		97.7273	3.0969	4.24482	96.875	0.504121	0.0302652	0.00824176	0.969297		31	974	1	39		97.5	3.08458	3.84995	96.875	0.502923	0.0300746	0.00584577	0.969477		31	921	1	92		98.9247	3.2563	9.08193	96.875	0.510905	0.0322129	0.0218103	0.967497		31	961
	EIKEN	R=7 / Pg1=135	1015	0.971292		29	972	1	43		97.7273	2.8971	4.23645	96.6667	0.503122	0.0283126	0.00624376	0.971295		29	976	1	39		97.5	2.88557	3.84236	96.6667	0.501928	0.0281343	0.00385572	0.971466		29	923	1	92		98.9247	3.04622	9.06404	96.6667	0.509855	0.0301346	0.0197095	0.969597		29	963
	EIKEN	R=7 / Pg1=140	1016	0.972249		28	973	1	43		97.7273	2.7972	4.23228	96.5517	0.502622	0.0273363	0.00524476	0.972294		28	977	1	39		97.5	2.78607	3.83858	96.5517	0.50143	0.0271642	0.0028607	0.972461		28	924	1	92		98.9247	2.94118	9.05512	96.5517	0.50933	0.0290955	0.0186591	0.970648		28	964
	EIKEN	R=7 / Pg1=145	1016	0.972249		28	973	1	43		97.7273	2.7972	4.23228	96.5517	0.502622	0.0273363	0.00524476	0.972294		28	977	1	39		97.5	2.78607	3.83858	96.5517	0.50143	0.0271642	0.0028607	0.972461		28	924	1	92		98.9247	2.94118	9.05512	96.5517	0.50933	0.0290955	0.0186591	0.970648		28	964
	EIKEN	R=7 / Pg1=150	1017	0.973206		27	974	1	43		97.7273	2.6973	4.22812	96.4286	0.502123	0.02636	0.00424575	0.973292		27	978	1	39		97.5	2.68657	3.83481	96.4286	0.500933	0.026194	0.00186567	0.973455		27	925	1	92		98.9247	2.83613	9.04621	96.4286	0.508804	0.0280564	0.0176087	0.971698		27	965
	EIKEN	R=7.5 / Pg1=5	12	0.0114833		993	8	40	4		9.09091	99.2008	33.3333	96.1278	0.541459	0.0901825	0.0829171	0.909126		996	9	37	3		7.5	99.1045	25	96.4182	0.533022	0.0743284	0.0660448	0.925043		944	8	89	4		4.30108	99.1597	33.3333	91.3843	0.517304	0.0426493	0.0346074	0.957026		987	5
	EIKEN	R=7.5 / Pg1=10	44	0.0421053		966	35	35	9		20.4545	96.5035	20.4545	96.5035	0.58479	0.197394	0.16958	0.796223		969	36	32	8		20	96.4179	18.1818	96.8032	0.58209	0.192836	0.164179	0.800802		919	33	82	11		11.828	96.5336	25	91.8082	0.541808	0.11418	0.0836157	0.882402		967	25
	EIKEN	R=7.5 / Pg1=15	61	0.0583732		952	49	32	12		27.2727	95.1049	19.6721	96.748	0.611888	0.259377	0.223776	0.728918		955	50	29	11		27.5	95.0249	18.0328	97.0528	0.612624	0.261318	0.225249	0.726705		905	47	79	14		15.0538	95.063	22.9508	91.9715	0.550584	0.143106	0.101168	0.850896		953	39
	EIKEN	R=7.5 / Pg1=20	90	0.0861244		926	75	29	15		34.0909	92.5075	16.6667	96.9634	0.632992	0.315366	0.265984	0.663336		929	76	26	14		35	92.4378	15.5556	97.2775	0.637189	0.323532	0.274378	0.654384		881	71	74	19		20.4301	92.542	21.1111	92.2513	0.564861	0.189064	0.129721	0.799186		928	64
	EIKEN	R=7.5 / Pg1=25	150	0.143541		868	133	27	17		38.6364	86.7133	11.3333	96.9832	0.626748	0.335029	0.253497	0.627856		871	134	24	16		40	86.6667	10.6667	97.3184	0.633333	0.346667	0.266667	0.614636		826	126	69	24		25.8065	86.7647	16	92.2905	0.562856	0.223909	0.125712	0.753648		869	123
	EIKEN	R=7.5 / Pg1=30	220	0.210526		799	202	26	18		40.9091	79.8202	8.18182	96.8485	0.603646	0.326537	0.207293	0.624417		802	203	23	17		42.5	79.801	7.72727	97.2121	0.611505	0.339154	0.22301	0.609446		759	193	66	27		29.0323	79.7269	12.2727	92	0.543796	0.231465	0.0875915	0.738066		801	191
	EIKEN	R=7.5 / Pg1=35	324	0.310048		701	300	20	24		54.5455	70.03	7.40741	97.2261	0.622877	0.381982	0.245754	0.544456		704	301	17	23		57.5	70.0498	7.09877	97.6422	0.637749	0.402786	0.275498	0.51993		668	284	53	40		43.0108	70.1681	12.3457	92.6491	0.565894	0.301798	0.131788	0.643251		701	291
	EIKEN	R=7.5 / Pg1=40	444	0.42488		583	418	18	26		59.0909	58.2418	5.85586	97.005	0.586663	0.344156	0.173327	0.584577		586	419	15	25		62.5	58.3085	5.63063	97.5042	0.604042	0.364428	0.208085	0.560753		554	398	47	46		49.4624	58.1933	10.3604	92.1797	0.538278	0.287838	0.0765564	0.655885		584	408
	EIKEN	R=7.5 / Pg1=45	545	0.521531		483	518	17	27		61.3636	48.2517	4.95413	96.6	0.548077	0.29609	0.0961538	0.645806		486	519	14	26		65	48.3582	4.77064	97.2	0.566791	0.314328	0.133582	0.623849		461	491	39	54		58.0645	48.4244	9.90826	92.2	0.532444	0.281174	0.0648889	0.664728		484	508
	EIKEN	R=7.5 / Pg1=50	642	0.614354		390	611	13	31		70.4545	38.961	4.82866	96.7742	0.547078	0.274498	0.0941558	0.678136		391	614	12	28		70	38.9055	4.36137	97.0223	0.544527	0.272338	0.0890547	0.680628		373	579	30	63		67.7419	39.1807	9.81308	92.5558	0.534613	0.265417	0.0692261	0.688446		392	600
	EIKEN	R=7.5 / Pg1=55	734	0.702392		299	702	12	32		72.7273	29.8701	4.35967	96.1415	0.512987	0.217237	0.025974	0.752463		299	706	12	28		70	29.7512	3.81471	96.1415	0.498756	0.208259	-0.00248756	0.763864		286	666	25	68		73.1183	30.042	9.26431	91.9614	0.515801	0.219662	0.031603	0.74945		302	690
	EIKEN	R=7.5 / Pg1=60	807	0.772249		229	772	9	35		79.5455	22.8771	4.33705	96.2185	0.512113	0.181977	0.0242258	0.797893		229	776	9	31		77.5	22.7861	3.84139	96.2185	0.50143	0.176592	0.0028607	0.804254		217	735	21	72		77.4194	22.7941	8.92193	91.1765	0.501067	0.176471	0.00213472	0.804402		231	761
	EIKEN	R=7.5 / Pg1=65	856	0.819139		183	818	6	38		86.3636	18.2817	4.43925	96.8254	0.523227	0.157888	0.0464535	0.828482		183	822	6	34		85	18.209	3.97196	96.8254	0.516045	0.154776	0.0320896	0.831551		172	780	17	76		81.7204	18.0672	8.8785	91.0053	0.498938	0.147646	-0.00212343	0.839471		183	809
	EIKEN	R=7.5 / Pg1=70	915	0.875598		128	873	2	42		95.4545	12.7872	4.59016	98.4615	0.541209	0.12206	0.0824176	0.873312		128	877	2	38		95	12.7363	4.15301	98.4615	0.538682	0.120995	0.0773632	0.874068		122	830	8	85		91.3978	12.8151	9.28962	93.8462	0.521065	0.117127	0.0421298	0.876082		127	865
	EIKEN	R=7.5 / Pg1=75	937	0.896651		106	895	2	42		95.4545	10.5894	4.48239	98.1481	0.53022	0.101081	0.0604396	0.895261		106	899	2	38		95	10.5473	4.0555	98.1481	0.527736	0.100199	0.0554726	0.895924		100	852	8	85		91.3978	10.5042	9.0715	92.5926	0.50951	0.0960061	0.0190205	0.899083		105	887
	EIKEN	R=7.5 / Pg1=80	958	0.916746		85	916	2	42		95.4545	8.49151	4.38413	97.7011	0.51973	0.0810553	0.0394605	0.916213		85	920	2	38		95	8.45771	3.9666	97.7011	0.517289	0.0803483	0.0345771	0.916787		79	873	8	85		91.3978	8.29832	8.87265	90.8046	0.498481	0.0758449	-0.00303831	0.921043		85	907
	EIKEN	R=7.5 / Pg1=85	973	0.9311		70	931	2	42		95.4545	6.99301	4.31655	97.2222	0.512238	0.0667514	0.0244755	0.93118		70	935	2	38		95	6.96517	3.90545	97.2222	0.509826	0.0661692	0.0196517	0.931691		65	887	7	86		92.4731	6.82773	8.83864	90.2778	0.496504	0.0631382	-0.00699151	0.934758		70	922
	EIKEN	R=7.5 / Pg1=90	979	0.936842		64	937	2	42		95.4545	6.39361	4.29009	96.9697	0.509241	0.0610299	0.0184815	0.937167		64	941	2	38		95	6.36816	3.88151	96.9697	0.506841	0.0604975	0.0136816	0.937652		60	892	6	87		93.5484	6.30252	8.88662	90.9091	0.499255	0.0589591	-0.00149092	0.939193		64	928
	EIKEN	R=7.5 / Pg1=95	991	0.948325		52	949	2	42		95.4545	5.19481	4.23814	96.2963	0.503247	0.0495868	0.00649351	0.949141		52	953	2	38		95	5.17413	3.83451	96.2963	0.500871	0.0491542	0.00174129	0.949576		49	903	5	88		94.6237	5.14706	8.87992	90.7407	0.498854	0.0487034	-0.00229285	0.950052		52	940
	EIKEN	R=7.5 / Pg1=100	995	0.952153		48	953	2	42		95.4545	4.7952	4.22111	96	0.501249	0.0457724	0.0024975	0.953132		48	957	2	38		95	4.77612	3.8191	96	0.498881	0.0453731	-0.00223881	0.953551		45	907	5	88		94.6237	4.72689	8.84422	90	0.496753	0.0447276	-0.00649453	0.954247		48	944
	EIKEN	R=7.5 / Pg1=105	1000	0.956938		44	957	1	43		97.7273	4.3956	4.3	97.7778	0.510614	0.042957	0.0212288	0.956314		44	961	1	39		97.5	4.37811	3.9	97.7778	0.509391	0.0426866	0.0187811	0.956546		42	910	3	90		96.7742	4.41176	9	93.3333	0.50593	0.0426945	0.0118596	0.956427		44	948
	EIKEN	R=7.5 / Pg1=110	1006	0.962679		38	963	1	43		97.7273	3.7962	4.27435	97.4359	0.507617	0.0370993	0.0152348	0.962306		38	967	1	39		97.5	3.78109	3.87674	97.4359	0.506405	0.0368657	0.0128109	0.962514		37	915	2	91		97.8495	3.88655	9.04573	94.8718	0.50868	0.0380297	0.0173602	0.961375		38	954
	EIKEN	R=7.5 / Pg1=115	1009	0.96555		35	966	1	43		97.7273	3.4965	4.26165	97.2222	0.506119	0.0341704	0.0122378	0.965303		35	970	1	39		97.5	3.48259	3.86521	97.2222	0.504913	0.0339552	0.00982587	0.965498		34	918	2	91		97.8495	3.57143	9.01883	94.4444	0.507104	0.0349462	0.0142089	0.964525		35	957
	EIKEN	R=7.5 / Pg1=120	1013	0.969378		31	970	1	43		97.7273	3.0969	4.24482	96.875	0.504121	0.0302652	0.00824176	0.969297		31	974	1	39		97.5	3.08458	3.84995	96.875	0.502923	0.0300746	0.00584577	0.969477		31	921	1	92		98.9247	3.2563	9.08193	96.875	0.510905	0.0322129	0.0218103	0.967497		31	961
	EIKEN	R=7.5 / Pg1=125	1017	0.973206		27	974	1	43		97.7273	2.6973	4.22812	96.4286	0.502123	0.02636	0.00424575	0.973292		27	978	1	39		97.5	2.68657	3.83481	96.4286	0.500933	0.026194	0.00186567	0.973455		27	925	1	92		98.9247	2.83613	9.04621	96.4286	0.508804	0.0280564	0.0176087	0.971698		27	965
	EIKEN	R=7.5 / Pg1=130	1018	0.974163		26	975	1	43		97.7273	2.5974	4.22397	96.2963	0.501623	0.0253837	0.00324675	0.974291		26	979	1	39		97.5	2.58706	3.83104	96.2963	0.500435	0.0252239	0.000870647	0.97445		26	926	1	92		98.9247	2.73109	9.03733	96.2963	0.508279	0.0270173	0.0165582	0.972749		26	966
	EIKEN	R=7.5 / Pg1=135	1020	0.976077		24	977	1	43		97.7273	2.3976	4.21569	96	0.500624	0.0234311	0.00124875	0.976289		24	981	1	39		97.5	2.38806	3.82353	96	0.49944	0.0232836	-0.0011194	0.976439		24	928	1	92		98.9247	2.52101	9.01961	96	0.507229	0.024939	0.0144574	0.974849		24	968
	EIKEN	R=7.5 / Pg1=140	1021	0.977033		23	978	1	43		97.7273	2.2977	4.21156	95.8333	0.500125	0.0224548	0.00024975	0.977287		23	982	1	39		97.5	2.28856	3.81978	95.8333	0.498943	0.0223134	-0.00211443	0.977434		23	929	1	92		98.9247	2.41597	9.01077	95.8333	0.506703	0.0238999	0.013407	0.9759		23	969
	EIKEN	R=7.5 / Pg1=145	1021	0.977033		23	978	1	43		97.7273	2.2977	4.21156	95.8333	0.500125	0.0224548	0.00024975	0.977287		23	982	1	39		97.5	2.28856	3.81978	95.8333	0.498943	0.0223134	-0.00211443	0.977434		23	929	1	92		98.9247	2.41597	9.01077	95.8333	0.506703	0.0238999	0.013407	0.9759		23	969
	EIKEN	R=7.5 / Pg1=150	1022	0.97799		22	979	1	43		97.7273	2.1978	4.20744	95.6522	0.499625	0.0214785	-0.000749251	0.978286		22	983	1	39		97.5	2.18905	3.81605	95.6522	0.498445	0.0213433	-0.00310945	0.978429		22	930	1	92		98.9247	2.31092	9.00196	95.6522	0.506178	0.0228608	0.0123566	0.97695		22	970
	EIKEN	R=8 / Pg1=5	12	0.0114833		993	8	40	4		9.09091	99.2008	33.3333	96.1278	0.541459	0.0901825	0.0829171	0.909126		996	9	37	3		7.5	99.1045	25	96.4182	0.533022	0.0743284	0.0660448	0.925043		944	8	89	4		4.30108	99.1597	33.3333	91.3843	0.517304	0.0426493	0.0346074	0.957026		987	5
	EIKEN	R=8 / Pg1=10	44	0.0421053		966	35	35	9		20.4545	96.5035	20.4545	96.5035	0.58479	0.197394	0.16958	0.796223		969	36	32	8		20	96.4179	18.1818	96.8032	0.58209	0.192836	0.164179	0.800802		919	33	82	11		11.828	96.5336	25	91.8082	0.541808	0.11418	0.0836157	0.882402		967	25
	EIKEN	R=8 / Pg1=15	61	0.0583732		952	49	32	12		27.2727	95.1049	19.6721	96.748	0.611888	0.259377	0.223776	0.728918		955	50	29	11		27.5	95.0249	18.0328	97.0528	0.612624	0.261318	0.225249	0.726705		905	47	79	14		15.0538	95.063	22.9508	91.9715	0.550584	0.143106	0.101168	0.850896		953	39
	EIKEN	R=8 / Pg1=20	90	0.0861244		926	75	29	15		34.0909	92.5075	16.6667	96.9634	0.632992	0.315366	0.265984	0.663336		929	76	26	14		35	92.4378	15.5556	97.2775	0.637189	0.323532	0.274378	0.654384		881	71	74	19		20.4301	92.542	21.1111	92.2513	0.564861	0.189064	0.129721	0.799186		928	64
	EIKEN	R=8 / Pg1=25	150	0.143541		868	133	27	17		38.6364	86.7133	11.3333	96.9832	0.626748	0.335029	0.253497	0.627856		871	134	24	16		40	86.6667	10.6667	97.3184	0.633333	0.346667	0.266667	0.614636		826	126	69	24		25.8065	86.7647	16	92.2905	0.562856	0.223909	0.125712	0.753648		869	123
	EIKEN	R=8 / Pg1=30	220	0.210526		799	202	26	18		40.9091	79.8202	8.18182	96.8485	0.603646	0.326537	0.207293	0.624417		802	203	23	17		42.5	79.801	7.72727	97.2121	0.611505	0.339154	0.22301	0.609446		759	193	66	27		29.0323	79.7269	12.2727	92	0.543796	0.231465	0.0875915	0.738066		801	191
	EIKEN	R=8 / Pg1=35	324	0.310048		701	300	20	24		54.5455	70.03	7.40741	97.2261	0.622877	0.381982	0.245754	0.544456		704	301	17	23		57.5	70.0498	7.09877	97.6422	0.637749	0.402786	0.275498	0.51993		668	284	53	40		43.0108	70.1681	12.3457	92.6491	0.565894	0.301798	0.131788	0.643251		701	291
	EIKEN	R=8 / Pg1=40	444	0.42488		583	418	18	26		59.0909	58.2418	5.85586	97.005	0.586663	0.344156	0.173327	0.584577		586	419	15	25		62.5	58.3085	5.63063	97.5042	0.604042	0.364428	0.208085	0.560753		554	398	47	46		49.4624	58.1933	10.3604	92.1797	0.538278	0.287838	0.0765564	0.655885		584	408
	EIKEN	R=8 / Pg1=45	545	0.521531		483	518	17	27		61.3636	48.2517	4.95413	96.6	0.548077	0.29609	0.0961538	0.645806		486	519	14	26		65	48.3582	4.77064	97.2	0.566791	0.314328	0.133582	0.623849		461	491	39	54		58.0645	48.4244	9.90826	92.2	0.532444	0.281174	0.0648889	0.664728		484	508
	EIKEN	R=8 / Pg1=50	642	0.614354		390	611	13	31		70.4545	38.961	4.82866	96.7742	0.547078	0.274498	0.0941558	0.678136		391	614	12	28		70	38.9055	4.36137	97.0223	0.544527	0.272338	0.0890547	0.680628		373	579	30	63		67.7419	39.1807	9.81308	92.5558	0.534613	0.265417	0.0692261	0.688446		392	600
	EIKEN	R=8 / Pg1=55	735	0.703349		298	703	12	32		72.7273	29.7702	4.35374	96.129	0.512488	0.216511	0.024975	0.753394		298	707	12	28		70	29.6517	3.80952	96.129	0.498259	0.207562	-0.00348259	0.76478		285	667	25	68		73.1183	29.937	9.2517	91.9355	0.515276	0.218894	0.0305525	0.75043		301	691
	EIKEN	R=8 / Pg1=60	809	0.774163		227	774	9	35		79.5455	22.6773	4.32633	96.1864	0.511114	0.180388	0.0222278	0.799824		227	778	9	31		77.5	22.5871	3.83189	96.1864	0.500435	0.17505	0.000870647	0.806165		215	737	21	72		77.4194	22.584	8.89988	91.1017	0.500017	0.174844	3.38845e-05	0.806419		229	763
	EIKEN	R=8 / Pg1=65	858	0.821053		181	820	6	38		86.3636	18.0819	4.4289	96.7914	0.522228	0.156162	0.0444555	0.830453		181	824	6	34		85	18.01	3.9627	96.7914	0.51505	0.153085	0.0300995	0.833509		170	782	17	76		81.7204	17.8571	8.85781	90.9091	0.497888	0.145929	-0.00422427	0.841522		181	811
	EIKEN	R=8 / Pg1=70	917	0.877512		126	875	2	42		95.4545	12.5874	4.58015	98.4375	0.54021	0.120153	0.0804196	0.875307		126	879	2	38		95	12.5373	4.14395	98.4375	0.537687	0.119104	0.0753731	0.876055		120	832	8	85		91.3978	12.605	9.26936	93.75	0.520014	0.115207	0.0400289	0.878173		125	867
	EIKEN	R=8 / Pg1=75	939	0.898565		104	897	2	42		95.4545	10.3896	4.47284	98.1132	0.529221	0.0991736	0.0584416	0.897256		104	901	2	38		95	10.3483	4.04686	98.1132	0.526741	0.0983085	0.0534826	0.897911		98	854	8	85		91.3978	10.2941	9.05218	92.4528	0.50846	0.094086	0.0169197	0.901174		103	889
	EIKEN	R=8 / Pg1=80	960	0.91866		83	918	2	42		95.4545	8.29171	4.375	97.6471	0.518731	0.0791481	0.0374625	0.918209		83	922	2	38		95	8.25871	3.95833	97.6471	0.516294	0.0784577	0.0325871	0.918774		77	875	8	85		91.3978	8.08824	8.85417	90.5882	0.49743	0.0739247	-0.00513915	0.923134		83	909
	EIKEN	R=8 / Pg1=85	975	0.933014		68	933	2	42		95.4545	6.79321	4.30769	97.1429	0.511239	0.0648442	0.0224775	0.933176		68	937	2	38		95	6.76617	3.89744	97.1429	0.508831	0.0642786	0.0176617	0.933678		63	889	7	86		92.4731	6.61765	8.82051	90	0.495454	0.0611954	-0.00909235	0.936852		68	924
	EIKEN	R=8 / Pg1=90	981	0.938756		62	939	2	42		95.4545	6.19381	4.28135	96.875	0.508242	0.0591227	0.0164835	0.939163		62	943	2	38		95	6.16915	3.8736	96.875	0.505846	0.058607	0.0116915	0.93964		58	894	6	87		93.5484	6.09244	8.8685	90.625	0.498204	0.0569938	-0.00359176	0.941289		62	930
	EIKEN	R=8 / Pg1=95	993	0.950239		50	951	2	42		95.4545	4.995	4.22961	96.1538	0.502248	0.0476796	0.0044955	0.951137		50	955	2	38		95	4.97512	3.82679	96.1538	0.499876	0.0472637	-0.000248756	0.951563		47	905	5	88		94.6237	4.93697	8.86203	90.3846	0.497803	0.0467155	-0.00439369	0.952149		50	942
	EIKEN	R=8 / Pg1=100	997	0.954067		46	955	2	42		95.4545	4.5954	4.21264	95.8333	0.50025	0.0438652	0.0004995	0.955128		46	959	2	38		95	4.57711	3.81143	95.8333	0.497886	0.0434826	-0.00422886	0.955538		43	909	5	88		94.6237	4.51681	8.82648	89.5833	0.495702	0.0427397	-0.00859537	0.956344		46	946
	EIKEN	R=8 / Pg1=105	1002	0.958852		42	959	1	43		97.7273	4.1958	4.29142	97.6744	0.509615	0.0410045	0.0192308	0.958311		42	963	1	39		97.5	4.1791	3.89222	97.6744	0.508396	0.0407463	0.016791	0.958535		40	912	3	90		96.7742	4.20168	8.98204	93.0233	0.504879	0.0406614	0.00975874	0.958526		42	950
	EIKEN	R=8 / Pg1=110	1008	0.964593		36	965	1	43		97.7273	3.5964	4.26587	97.2973	0.506618	0.0351467	0.0132368	0.964304		36	969	1	39		97.5	3.58209	3.86905	97.2973	0.50541	0.0349254	0.0108209	0.964503		35	917	2	91		97.8495	3.67647	9.02778	94.5946	0.50763	0.0359741	0.0152593	0.963475		36	956
	EIKEN	R=8 / Pg1=115	1011	0.967464		33	968	1	43		97.7273	3.2967	4.25321	97.0588	0.50512	0.0322178	0.0102398	0.9673		33	972	1	39		97.5	3.28358	3.85757	97.0588	0.503918	0.0320149	0.00783582	0.967487		32	920	2	91		97.8495	3.36134	9.00099	94.1176	0.506054	0.0328906	0.0121081	0.966626		33	959
	EIKEN	R=8 / Pg1=120	1015	0.971292		29	972	1	43		97.7273	2.8971	4.23645	96.6667	0.503122	0.0283126	0.00624376	0.971295		29	976	1	39		97.5	2.88557	3.84236	96.6667	0.501928	0.0281343	0.00385572	0.971466		29	923	1	92		98.9247	3.04622	9.06404	96.6667	0.509855	0.0301346	0.0197095	0.969597		29	963
	EIKEN	R=8 / Pg1=125	1019	0.97512		25	976	1	43		97.7273	2.4975	4.21982	96.1538	0.501124	0.0244074	0.00224775	0.97529		25	980	1	39		97.5	2.48756	3.82728	96.1538	0.499938	0.0242537	-0.000124378	0.975445		25	927	1	92		98.9247	2.62605	9.02846	96.1538	0.507754	0.0259781	0.0155078	0.973799		25	967
	EIKEN	R=8 / Pg1=130	1020	0.976077		24	977	1	43		97.7273	2.3976	4.21569	96	0.500624	0.0234311	0.00124875	0.976289		24	981	1	39		97.5	2.38806	3.82353	96	0.49944	0.0232836	-0.0011194	0.976439		24	928	1	92		98.9247	2.52101	9.01961	96	0.507229	0.024939	0.0144574	0.974849		24	968
	EIKEN	R=8 / Pg1=135	1022	0.97799		22	979	1	43		97.7273	2.1978	4.20744	95.6522	0.499625	0.0214785	-0.000749251	0.978286		22	983	1	39		97.5	2.18905	3.81605	95.6522	0.498445	0.0213433	-0.00310945	0.978429		22	930	1	92		98.9247	2.31092	9.00196	95.6522	0.506178	0.0228608	0.0123566	0.97695		22	970
	EIKEN	R=8 / Pg1=140	1023	0.978947		21	980	1	43		97.7273	2.0979	4.20332	95.4545	0.499126	0.0205022	-0.00174825	0.979285		21	984	1	39		97.5	2.08955	3.81232	95.4545	0.497948	0.0203731	-0.00410448	0.979424		21	931	1	92		98.9247	2.20588	8.99316	95.4545	0.505653	0.0218216	0.0113061	0.978		21	971
	EIKEN	R=8 / Pg1=145	1023	0.978947		21	980	1	43		97.7273	2.0979	4.20332	95.4545	0.499126	0.0205022	-0.00174825	0.979285		21	984	1	39		97.5	2.08955	3.81232	95.4545	0.497948	0.0203731	-0.00410448	0.979424		21	931	1	92		98.9247	2.20588	8.99316	95.4545	0.505653	0.0218216	0.0113061	0.978		21	971
	EIKEN	R=8 / Pg1=150	1024	0.979904		20	981	1	43		97.7273	1.998	4.19922	95.2381	0.498626	0.0195259	-0.00274725	0.980283		20	985	1	39		97.5	1.99005	3.80859	95.2381	0.49745	0.019403	-0.0050995	0.980418		20	932	1	92		98.9247	2.10084	8.98438	95.2381	0.505128	0.0207825	0.0102557	0.979051		20	972
	GASTRIN	0.5	334	0.319617		671	330	40	4		9.09091	67.033	1.1976	94.3741	0.380619	0.0609391	-0.238761	0.967021		675	330	36	4		10	67.1642	1.1976	94.9367	0.385821	0.0671642	-0.228358	0.958029		634	318	77	16		17.2043	66.5966	4.79042	89.1702	0.419005	0.114575	-0.161991	0.8928		664	328
	GASTRIN	0.6	357	0.341627		648	353	40	4		9.09091	64.7353	1.12045	94.186	0.369131	0.0588502	-0.261738	0.975093		652	353	36	4		10	64.8756	1.12045	94.7674	0.374378	0.0648756	-0.251244	0.966112		611	341	77	16		17.2043	64.1807	4.48179	88.8081	0.406925	0.110418	-0.18615	0.902117		641	351
	GASTRIN	0.7	378	0.361722		627	374	40	4		9.09091	62.6374	1.0582	94.003	0.358641	0.0569431	-0.282717	0.982875		631	374	36	4		10	62.7861	1.0582	94.6027	0.36393	0.0627861	-0.272139	0.973903		591	361	76	17		18.2796	62.0798	4.49735	88.6057	0.401797	0.113479	-0.196406	0.900898		620	372
	GASTRIN	0.8	389	0.372249		616	385	40	4		9.09091	61.5385	1.02828	93.9024	0.353147	0.0559441	-0.293706	0.987104		620	385	36	4		10	61.6915	1.02828	94.5122	0.358458	0.0616915	-0.283085	0.978138		581	371	75	18		19.3548	61.0294	4.62725	88.5671	0.401921	0.118121	-0.196157	0.895676		609	383
	GASTRIN	0.9	406	0.388517		599	402	40	4		9.09091	59.8402	0.985222	93.7402	0.344655	0.0544001	-0.310689	0.993845		603	402	36	4		10	60	0.985222	94.3662	0.35	0.06	-0.3	0.984886		564	388	75	18		19.3548	59.2437	4.4335	88.2629	0.392993	0.114665	-0.214015	0.903588		592	400
	GASTRIN	1	422	0.403828		583	418	40	4		9.09091	58.2418	0.947867	93.5795	0.336663	0.0529471	-0.326673	1.00041		587	418	36	4		10	58.408	0.947867	94.2215	0.34204	0.058408	-0.31592	0.991458		550	402	73	20		21.5054	57.7731	4.73934	88.2825	0.396392	0.124243	-0.207215	0.89132		576	416
	GASTRIN	1.1	434	0.415311		571	430	40	4		9.09091	57.043	0.921659	93.4534	0.330669	0.0518572	-0.338661	1.00547		575	430	36	4		10	57.2139	0.921659	94.108	0.33607	0.0572139	-0.327861	0.996526		539	413	72	21		22.5806	56.6176	4.83871	88.216	0.395991	0.127846	-0.208017	0.887456		564	428
	GASTRIN	1.2	442	0.422967		564	437	39	5		11.3636	56.3437	1.13122	93.5323	0.338536	0.0640269	-0.322927	0.988043		568	437	35	5		12.5	56.5174	1.13122	94.1957	0.345087	0.0706468	-0.309826	0.977087		532	420	71	22		23.6559	55.8824	4.97738	88.2255	0.397691	0.132195	-0.204617	0.881747		556	436
	GASTRIN	1.3	451	0.431579		555	446	39	5		11.3636	55.4446	1.10865	93.4343	0.334041	0.0630052	-0.331918	0.992048		559	446	35	5		12.5	55.6219	1.10865	94.1077	0.340609	0.0695274	-0.318781	0.981105		523	429	71	22		23.6559	54.937	4.87805	88.0471	0.392964	0.129958	-0.214071	0.886515		547	445
	GASTRIN	1.4	462	0.442105		545	456	38	6		13.6364	54.4456	1.2987	93.482	0.34041	0.0742439	-0.319181	0.976416		549	456	34	6		15	54.6269	1.2987	94.1681	0.348134	0.0819403	-0.303731	0.963521		513	439	70	23		24.7312	53.8866	4.97835	87.9931	0.393089	0.133268	-0.213823	0.882714		536	456
	GASTRIN	1.5	479	0.458373		529	472	37	7		15.9091	52.8472	1.46138	93.4629	0.343781	0.084075	-0.312438	0.964089		533	472	33	7		17.5	53.0348	1.46138	94.1696	0.352674	0.0928109	-0.294652	0.949314		500	452	66	27		29.0323	52.521	5.63674	88.3392	0.407766	0.15248	-0.184467	0.853854		519	473
[truncated: 25 more columns]
